# Supplementary material for: German primary care data collection projects: a scoping review
Source: PubMed Central journal article supplement — BMJ Open. 2024 Feb 20;14(2):e074566. doi: 10.1136/bmjopen-2023-074566 (PMC10882319; doi:10.1136/bmjopen-2023-074566), 2024-02-20
Supplement: bmjopen-2023-074566.draft_revisions.pdf [file bmjopen-2023-074566.draft_revisions.pdf]

# BMJ Open

BMJ Open is committed to open peer review. As part of this commitment we make the peer review history of every article we publish publicly available.

When an article is published we post the peer reviewers' comments and the authors' responses online. We also post the versions of the paper that were used during peer review. These are the versions that the peer review comments apply to.

The versions of the paper that follow are the versions that were submitted during the peer review process. They are not the versions of record or the final published versions. They should not be cited or distributed as the published version of this manuscript.

BMJ Open is an open access journal and the full, final, typeset and author-corrected version of record of the manuscript is available on our site with no access controls, subscription charges or pay-per-view fees (<http://bmjopen.bmj.com>).

If you have any questions on BMJ Open's open peer review process please email [info.bmjopen@bmj.com](mailto:info.bmjopen@bmj.com)

# BMJ Open

## German primary care data collection projects: a scoping review

|                               |                                                                                                                                                                                                                                                                                                                                                                                                                                                                                                                                                                                                                                                                                                                                                                                                                                                                                                                                                                                                                                                                                                                                                                                                                                                                                                                               |
|-------------------------------|-------------------------------------------------------------------------------------------------------------------------------------------------------------------------------------------------------------------------------------------------------------------------------------------------------------------------------------------------------------------------------------------------------------------------------------------------------------------------------------------------------------------------------------------------------------------------------------------------------------------------------------------------------------------------------------------------------------------------------------------------------------------------------------------------------------------------------------------------------------------------------------------------------------------------------------------------------------------------------------------------------------------------------------------------------------------------------------------------------------------------------------------------------------------------------------------------------------------------------------------------------------------------------------------------------------------------------|
| Journal:                      | <i>BMJ Open</i>                                                                                                                                                                                                                                                                                                                                                                                                                                                                                                                                                                                                                                                                                                                                                                                                                                                                                                                                                                                                                                                                                                                                                                                                                                                                                                               |
| Manuscript ID                 | bmjopen-2023-074566                                                                                                                                                                                                                                                                                                                                                                                                                                                                                                                                                                                                                                                                                                                                                                                                                                                                                                                                                                                                                                                                                                                                                                                                                                                                                                           |
| Article Type:                 | Original research                                                                                                                                                                                                                                                                                                                                                                                                                                                                                                                                                                                                                                                                                                                                                                                                                                                                                                                                                                                                                                                                                                                                                                                                                                                                                                             |
| Date Submitted by the Author: | 10-Apr-2023                                                                                                                                                                                                                                                                                                                                                                                                                                                                                                                                                                                                                                                                                                                                                                                                                                                                                                                                                                                                                                                                                                                                                                                                                                                                                                                   |
| Complete List of Authors:     | <p>Moser, Konstantin; Institute of General Practice &amp; Family Medicine, Medical Faculty of the Martin Luther University Halle-Wittenberg; Institute of Medical Epidemiology, Biometrics, and Informatics, Medical Faculty of the Martin Luther University Halle-Wittenberg</p> <p>Massag, Janka; Institute of Medical Epidemiology, Biometrics, and Informatics , Medical Faculty of the Martin Luther University Halle-Wittenberg</p> <p>Frese, T; University of Halle-Wittenberg,, Institute of General Practitce &amp; Family Medicine of the Medical Faculty</p> <p>Mikolajczyk, Rafael; Martin Luther University Halle Wittenberg, Institute for Medical Epidemiology, Biometrics and Informatics</p> <p>Christoph, Jan; Junior Research Group (Bio-)Medical Data Science , Institute of Medical Epidemiology, Biometrics, and Informatics</p> <p>Pushpa, Joshi; Institute of General Practice &amp; Family Medicine, Medical Faculty of the Martin Luther University Halle-Wittenberg</p> <p>Straube, Johanna; Medical Faculty of the Martin Luther University Halle-Wittenberg, Institute of General Practice &amp; Family Medicine</p> <p>Unverzagt, Susanne; Institute of General Practice and Family Medicine, Martin-Luther University Halle-Wittenberg; Department of General Practice, University Leipzig</p> |
| Keywords:                     | Primary Care < Primary Health Care, GENERAL MEDICINE (see Internal Medicine), Health informatics < BIOTECHNOLOGY & BIOINFORMATICS                                                                                                                                                                                                                                                                                                                                                                                                                                                                                                                                                                                                                                                                                                                                                                                                                                                                                                                                                                                                                                                                                                                                                                                             |
|                               |                                                                                                                                                                                                                                                                                                                                                                                                                                                                                                                                                                                                                                                                                                                                                                                                                                                                                                                                                                                                                                                                                                                                                                                                                                                                                                                               |

SCHOLARONE™  
Manuscripts

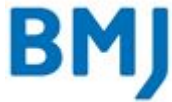

I, the Submitting Author has the right to grant and does grant on behalf of all authors of the Work (as defined in the below author licence), an exclusive licence and/or a non-exclusive licence for contributions from authors who are: i) UK Crown employees; ii) where BMJ has agreed a CC-BY licence shall apply, and/or iii) in accordance with the terms applicable for US Federal Government officers or employees acting as part of their official duties; on a worldwide, perpetual, irrevocable, royalty-free basis to BMJ Publishing Group Ltd ("BMJ") its licensees and where the relevant Journal is co-owned by BMJ to the co-owners of the Journal, to publish the Work in this journal and any other BMJ products and to exploit all rights, as set out in our [licence](#).

The Submitting Author accepts and understands that any supply made under these terms is made by BMJ to the Submitting Author unless you are acting as an employee on behalf of your employer or a postgraduate student of an affiliated institution which is paying any applicable article publishing charge ("APC") for Open Access articles. Where the Submitting Author wishes to make the Work available on an Open Access basis (and intends to pay the relevant APC), the terms of reuse of such Open Access shall be governed by a Creative Commons licence – details of these licences and which [Creative Commons](#) licence will apply to this Work are set out in our licence referred to above.

Other than as permitted in any relevant BMJ Author's Self Archiving Policies, I confirm this Work has not been accepted for publication elsewhere, is not being considered for publication elsewhere and does not duplicate material already published. I confirm all authors consent to publication of this Work and authorise the granting of this licence.

# German primary care data collection projects: a scoping review

Konstantin Moser<sup>1,2</sup>, Janka Massag<sup>2</sup>, Thomas Frese<sup>1</sup>, Rafael Mikolajczyk<sup>2</sup>, Jan Christoph<sup>3</sup>, Joshi Pushpa<sup>1</sup>, Johanna Straube<sup>1</sup>, Susanne Unverzagt<sup>1</sup>

<sup>1</sup>Institute of General Practice & Family Medicine, Interdisciplinary Center of Health Sciences, Medical Faculty of the Martin Luther University Halle-Wittenberg, Halle (Saale), Germany

<sup>2</sup>Institute of Medical Epidemiology, Biometrics, and Informatics, Interdisciplinary Center of Health Sciences, Medical Faculty of the Martin Luther University Halle-Wittenberg, Halle (Saale), Germany

<sup>3</sup>Junior Research Group (Bio-)Medical Data Science, Interdisciplinary Center of Health Sciences, Medical Faculty of the Martin Luther University Halle-Wittenberg, Halle (Saale), Germany

## Corresponding author:

Konstantin Moser (M. Sc.)

Institute of General Practice & Family Medicine

Magdeburger Str. 8

06112, Halle (Saale)

Germany

konstantin.moser@uk-halle.de

## Abstract

**Background:** The widespread use of electronic health records (EHRs) has led to a growing number of large routine primary care data collection projects globally, making these records a valuable resource for health services and epidemiological and clinical research. This scoping review aims to comprehensively assess and compare strengths and limitations of all German primary care data collection projects and relevant research publications that extract data directly from practice management systems.

**Methods:** A literature search was conducted in the electronic databases in May 2021 and in June 2022. The search string included terms related to general practice, routine data, and Germany. The retrieved studies were classified as applied studies and methodological studies, and categorized by type of research, subject area, sample of publications, disease category, or main medication analyzed.

**Results:** A total of 962 references were identified, of which 291 potentially eligible studies were screened, and 241 studies based on six German EHR database projects were included. Five of the databases were publicly funded and one was privately funded. The projects showed strong heterogeneity in terms of project size, methods of data collection, and variables collected. The majority of the studies (85%) were contributed by only one database and most of the studies (52%) focused on pharmacoepidemiologic topics, including prescription patterns (n = 68) and studies about treatment outcomes, compliance, and treatment effectiveness (n = 34). Epidemiologic studies (32%) mainly focused on incidence and prevalence studies (n = 41) and risk and comorbidity analysis studies (n = 31). A small proportion (n = 23) of studies were in the field of health services research, such as hospitalization.

**Conclusion:** The development and durability of primary care data collection projects in Germany is hindered by insufficient public funding, technical issues of data extraction, and strict data protection regulations. There is a need for further research and collaboration to improve the usability of EHRs for health services and research.

**Keywords:** Data collection; Electronic health records; Primary care; Database projects; Routine data; Scoping review.

**Count:** 3268 words

75  
76  
77

## Introduction

Electronic health records (EHRs) serve as a comprehensive record of a patient's health information, capturing crucial details from each medical visit (1). While originally created for clinical purposes, EHRs are now widely utilized in epidemiological and clinical research, as well as for improving healthcare services (2, 3). Currently, about 36 large routine primary care data collection projects exist globally, in which EHRs are directly collected from practice management systems (PMS). These projects, which allow millions of patients to anonymously contribute data for health sciences, are mainly carried out in English-speaking (United Kingdom, USA, and Canada) and European countries. The success and longevity of these projects is influenced by factors such as strong academic and governmental support as well as the use of comprehensive technical facilities for data extraction and analysis (4).

In Germany, the analysis of EHRs in primary care is largely based on health insurance data rather than primary care data collection projects (5). However, health insurance data is primarily recorded for accounting purposes and lacks valuable information such as clinical input data, reasons for encounters, or diagnostic procedures (6). Additionally, privately insured patients, which account for approximately 13% of the German population, are often not included in such health insurance databases, potentially leading to selection bias (7).

In Germany, primary care is predominantly delivered by general practitioners (GPs) but may also encompass any outpatient physician that can be visited without a referral, regardless of their specialty (8). Between 2002-2010, the Federal Ministry of Education and Research (Bundesministerium für Bildung und Forschung [BMBF]) recognized the importance of family medicine in the improvement of health services and research (9). During this time, the ministry also funded two primary care data collection projects, MedVip (Medizinische Versorgung in Praxen) and CONTENT (CONTinuous morbidity registration Epidemiologic NeTwork) (10). However, these projects ended due to limited funding and technical challenges, and a standardized interface for extracting EHRs is still lacking, even though there are over 132 different PMS available on the German market (11-13). Despite these challenges, the use of EHRs in outpatient care continues to grow due to the vast amount of data available. In 2020, for example, approximately 688 million outpatient cases were treated by 161,400 outpatient physicians in Germany, representing a "real world data treasure" (14).

EHRs have evolved from their initial purpose of billing to becoming a valuable tool for epidemiologic and clinical research (2, 3). The increasing functionality and quality of EHRs have made them an affordable and accessible data source (15). In clinical research, for example, EHRs can facilitate patient identification and recruitment, assess study feasibility, and streamline data collection at baseline and follow-up (15-17).

The aim of this scoping review is to identify and describe all German primary care data collection projects and research publications dedicated to extracting data from PMS. This might facilitate further research by describing the methodologic problems, amplifying possible solutions, and proposing the potential of the projects to inform health policy and practice.

## 115 Methods

### 116 Search strategy

117 This scoping review follows the Preferred Reporting Items for Systematic Reviews and Meta-Analyses  
118 extension for Scoping Reviews (PRISMA-ScR) checklist (18). In order to identify studies relevant for our  
119 research question, we explored two electronic databases, Medline (via OVID) and LIVIVO, the latter of  
120 which is a German database for life sciences. The search was conducted in May 2021 and updated in  
121 June 2022, searching for all records until this time point without any time restrictions. The search string  
122 combined the terms "general practice" with synonyms like "family physician" as well as "routine data".  
123 Other terms such as "electronic health record" or "Germany" were included to cover all relevant  
124 aspects of our research questions. For each keyword, relevant Medical Subject Headings (MeSH) terms  
125 were identified for the Medline exploration. The LIVIVO search was conducted in German with the  
126 equivalent terms. When relevant projects were identified, the project names were added to the search  
127 string to find further publications. In addition, we searched the project websites and contacted the  
128 project's principal investigators (PIs) using a comprehensive checklist that included a list of  
129 publications retrieved by the search to identify any missing project information that was not publicly  
130 available. With encouragement from the PI of the IQVIA™ Disease Analyzer, we also conducted a  
131 search on PubMed (National Library of Medicine [NLM]) using the keywords "Disease Analyzer" and  
132 "Germany" to gather all relevant publications from this database. The complete search strategy can be  
133 found in the supplement (Table S1).

### 134 Inclusion/Exclusion Criteria

135 Abstract, title, and subsequently full-texts were reviewed independently by three researchers (KM, JM,  
136 and JS) and checked for eligibility. All disagreements were resolved through consensus. If no consensus  
137 was reached, a fourth researcher was consulted (SU).

138 Studies were eligible if they met the following inclusion criteria: 1) the study population consisted of  
139 patients who received treatment from primary care physicians but could also include patients who  
140 received care from other specialists who were not considered primary care physicians; 2) study data  
141 were routinely collected and directly extracted from PMS; and 3) full-text publications in English or  
142 German language. The following were excluded: 1) health research studies using primary data, health  
143 insurance data, and data from disease registries; 2) conference contributions and publications in  
144 languages other than English or German.

### 145 Data extraction

146 Information from the retrieved publications was extracted by KM, JM, and JS. JM and JS each reviewed  
147 the included publications using a standardized data extraction template. The data was double checked  
148 by KM and entered in Table S4. We extracted information on the following: German primary care data  
149 collection projects including general information, data collection methods, data evaluation, and  
150 recruitment strategies, and classified studies as applied studies and methodological studies and  
151 categorized type of research into subject area, sample of publications, disease category, or main  
152 medication analyzed.

## 153 Results

154 We identified 962 references, screened a 291 of those as potentially eligible studies, and included 241  
155 studies conducted with data from six German EHR database projects (see Figure 1).

1  
2  
3 156 **Figure 1: PRISMA 2020 flow diagram for new systematic reviews which included searches of**  
4 157 **databases and registers only**

### 6 158 Database characteristics

8 159 Four out of six primary health care data collection projects are currently active and two have been  
9 160 completed (Table 1). This overview is sorted by the year in which data collection began.

11 161 Of the six, the IQVIA™ Disease Analyser (DA) is the only German project out of the six identified by this  
12 162 review that is exclusively funded by the pharmaceutical sector. It is specialized in  
13 163 pharmacoepidemiologic research and is used as an information system for federal health monitoring  
14 164 (19). Currently, it includes patient records from around 2815 practices, mostly general practices but  
15 165 also including other specialties like cardiology, dermatology, and pediatrics, which are not linked across  
16 166 practices (20). With approximately 34 million cases included, it is the largest German primary data  
17 167 collection database and considered to be nationally representative (21).

20 168 The other five primary care data collection databases are publicly funded and organized by local  
21 169 academic research groups. Main financiers are the BMBF and the German Research Foundation (DFG).  
22 170 The MedVip project aimed to realize first solutions for the use of routine data documentation in the  
23 171 general practice setting. At its peak, a total of 165 practices with approximately 153,000 patient  
24 172 datasets were extracted from 21 different PMS providers. The CONTENT project was based on the  
25 173 International Classification of Primary Care (ICPC) of episodes of care as the primary classification  
26 174 system (22, 23). Up to 23 practices provided data including approximately 200,000 cases. The project  
27 175 ended because of very high costs and organizational demand. BeoNet (Beobachtungspraxen-  
28 176 Netzwerk)-Hannover was integrated within the German Center for Lung Research with an initial focus  
29 177 on lung diseases and collects data from approximately 16 practices. Currently, the database includes  
30 178 343.796 cases. RADARplus (Routine Anonymised Data for Advanced Health Services Research plus)  
31 179 aims to develop the infrastructure and technologies, including electronic consent management due to  
32 180 the German data protection regulations, and collects data from seven practices including 100  
33 181 pseudonymous cases. BeoNet-Halle (24) is the most recent database and includes anonymized as well  
34 182 as linked pseudonymized datasets from general practices and other types of practices in Germany. The  
35 183 database includes 71,911 anonymized and 471 pseudonymized datasets from five practices in Saxony-  
36 184 Anhalt region.

41 185 The frequency of data collection by the projects ranges from weekly (BeoNet-Hannover), monthly (DA,  
42 186 BeoNet-Halle), and quarterly (CONTENT), to time points without a fixed interval (MedVip, RADARplus).  
43 187 It is crucial to note that in principle the data export interval can be configured to any desired value,  
44 188 including very short intervals.



189 *Table 1: Overview of German primary care data collection projects*

|                                                                                                                                                                                          | <b>IQVIA™ Disease Analyzer (DA, Mediplus)</b>               | <b>MedVip (not active)</b>                       | <b>CONTENT (not active)</b>                                                                 | <b>BeoNet-Hannover</b>                                                                | <b>RADARplus*</b>                                                                                                                       | <b>BeoNet-Halle</b>                                              |
|------------------------------------------------------------------------------------------------------------------------------------------------------------------------------------------|-------------------------------------------------------------|--------------------------------------------------|---------------------------------------------------------------------------------------------|---------------------------------------------------------------------------------------|-----------------------------------------------------------------------------------------------------------------------------------------|------------------------------------------------------------------|
| Funding sources                                                                                                                                                                          | Private                                                     |                                                  |                                                                                             | Public                                                                                |                                                                                                                                         |                                                                  |
| Homepage                                                                                                                                                                                 | <a href="https://www.iqvia.com/">https://www.iqvia.com/</a> | n.a.                                             | <a href="http://content-info.org/">http://content-info.org/</a>                             | <a href="https://www.mhh.de/forschung/beonet">https://www.mhh.de/forschung/beonet</a> | <a href="https://generalpractice.umg.eu/forschung/projekte/radarplus/">https://generalpractice.umg.eu/forschung/projekte/radarplus/</a> | <a href="http://www.beonet.org">http://www.beonet.org</a>        |
| Research group                                                                                                                                                                           | IQVIA™ Commercial GmbH & Co. OHG                            | University Medical Center Goettingen             | Department of general practice and health services research, Heidelberg University Hospital | Hannover Medical School and German Center for Lung Research                           | University Medical Center Goettingen                                                                                                    | Medical Faculty of the Martin Luther University Halle-Wittenberg |
| Period of data collection                                                                                                                                                                | Since 1992                                                  | 2002 to 2010                                     | 2003 to 2014                                                                                | Since 2016                                                                            | Since 2016                                                                                                                              | Since 2020                                                       |
| Included region                                                                                                                                                                          | Whole Germany                                               | Goettingen and Freiburg                          | Baden-Wuerttemberg, Hessen, Lower Saxony and Rhineland-Palatinate                           | Whole Germany                                                                         | Goettingen                                                                                                                              | Whole Germany                                                    |
| Frequency                                                                                                                                                                                | Monthly                                                     | No fixed interval (after a practice appointment) | Quarterly                                                                                   | Weekly                                                                                | No fixed interval (after a practice appointment)                                                                                        | Monthly                                                          |
| Total number of practices (physicians) included (n)                                                                                                                                      | 2815 (3540) (November 2022)                                 | 165 (n.a.) (May 2008)                            | 23 (41) (March 2014)                                                                        | 16 (27) (March 2023)                                                                  | 7 (n.a.) (February 2022)                                                                                                                | 5 (40) (February 2023)                                           |
| Total number of anonymized (pseudonymized) patients included (n)                                                                                                                         | 34 million (-)                                              | 153,000 (-)                                      | 200,000 (-)                                                                                 | 343.796 (-)                                                                           | n.a. (100)                                                                                                                              | 71.911 (471)                                                     |
| The data sources include both published and unpublished sources. *Data provided refers to the completed project RADAR, as data from the ongoing project RADARplus are not yet available. |                                                             |                                                  |                                                                                             |                                                                                       |                                                                                                                                         |                                                                  |
| n: number; n.a.: not available                                                                                                                                                           |                                                             |                                                  |                                                                                             |                                                                                       |                                                                                                                                         |                                                                  |

190

## 191 Data collection methods

192 While some projects exclusively collect anonymized data (DA, MedVip, CONTENT), other projects  
193 (BeoNet-Hannover, RADARplus, BeoNet-Halle) implement informed consent procedures, whereby  
194 identifiable data leaves the practice in accordance with data protection regulations (Table 2). The  
195 projects are very heterogeneous in terms of workflows for collection, transfer, and storage of data,  
196 including insertion of trust offices (RADARplus and BeoNet-Halle). These two projects also obtain  
197 patient consent to re-contact patients.

198 Three projects (MedVip, BeoNet-Hannover, RADARplus) extract data using a universal interface  
199 (Behandlungsdatentransfer [BDT]). BDT was implemented by the central institute for statutory health  
200 care to support data exchange between different PMS. The MedVip project has shown the feasibility  
201 of data extraction using BDT with various implementations by different software providers. However,  
202 its use requires partly that PMS providers assist on-site in extracting the requested data. Despite  
203 several updates to the BDT interface, it may still cause inadequate data quality when extracting data  
204 from different PMS. Since June 2021, an “archive and exchange interface” is mandatory in PMS which  
205 shall replace BDT. It is based on the interoperability standard HL7 FHIR (Health Level Seven  
206 International Fast Healthcare Interoperability Resources), which has gained widespread adoption in  
207 the healthcare industry and facilitates interoperability.

208 The other projects (DA, CONTENT, BeoNet-Halle) developed their own software solutions to extract  
209 predefined datasets. The CONTENT project developed a tailored data extraction software and a  
210 modular ICPC software. For BeoNet-Halle, specific exporting modules allow anonymized or  
211 pseudonymized data extraction depending on a patient's consent status.

212 Some projects (DA, CONTENT, BeoNet-Hannover, and BeoNet-Halle) provide training on how to use  
213 the software and others provide on-site support to extract data (MedVip and RADARplus). For most  
214 projects, data can be uploaded manually by the physician. Some projects have also implemented  
215 automatic upload to a secure network within the database location. Data validation and integrity  
216 checks are run in all projects before data is uploaded to the database and subsequently to an analysis  
217 server that can be assessed by researchers. This process is generally facilitated by a database  
218 administrator.

1  
2  
3 219

Table 2: Data collection methods

|                                                    |                                | IQVIA™ Disease Analyzer                                                                                                                                             | MedVip (not active)                               | CONTENT (not active)                                                             | BeoNet-Hannover                       | RADARplus                                                                 | BeoNet-Halle                                             |
|----------------------------------------------------|--------------------------------|---------------------------------------------------------------------------------------------------------------------------------------------------------------------|---------------------------------------------------|----------------------------------------------------------------------------------|---------------------------------------|---------------------------------------------------------------------------|----------------------------------------------------------|
| <b>Export types</b>                                | Anonymous                      | ✓                                                                                                                                                                   | ✓                                                 | ✓                                                                                | ✓                                     | ✓                                                                         | ✓                                                        |
|                                                    | Pseudonymous                   | -                                                                                                                                                                   | -                                                 | -                                                                                | ✓                                     | ✓                                                                         | ✓                                                        |
| <b>Upload medium</b>                               |                                | n.a.                                                                                                                                                                | Floppy disc or CD send via mail or on-site export | CD, Disc, DVD, email, direct website upload, digital data transfer using GUS box | Automatically or manually to database | Via USB into software and ultimately to database                          | Automatically or manually to database                    |
| <b>Software Details</b>                            | Interface                      | Not based on BDT interface                                                                                                                                          | Interface for BDT-data export                     | Modular ICPC classification software                                             | Interface for BDT-data export         | Interface for BDT-data export                                             | Universal interface to create a copy of the PMS database |
|                                                    | Export from different PMSs (n) | 2                                                                                                                                                                   | PMSs with BDT interface                           | 2                                                                                | 2                                     | PMSs with BDT interface                                                   | >70                                                      |
| <b>Database details</b>                            | Location                       | Unknown                                                                                                                                                             | Medical Center Goettingen                         | Heidelberg University Clinic hospital                                            | Hannover Medical School Location      | Medical Center Goettingen                                                 | Martin Luther University Halle-Wittenberg                |
|                                                    | Database                       | n.a.                                                                                                                                                                | MySQL                                             | n.a.                                                                             | Postgre SQL                           | MySQL                                                                     | Postgre SQL                                              |
|                                                    | Developer                      | n.a.                                                                                                                                                                | Self                                              | Self                                                                             | MUGS Informationsgesellschaft mbH     | Gesellschaft für wissenschaftliche Datenverarbeitung mbH Göttingen (GWDG) | Self                                                     |
|                                                    | Graphical user interface       | n.a.                                                                                                                                                                | Perl                                              | n.a.                                                                             | PrimeFaces                            | n.a.                                                                      | -                                                        |
|                                                    | Operating language             | n.a.                                                                                                                                                                | Java                                              | n.a.                                                                             | Java EE6                              | n.a.                                                                      | Python                                                   |
| <b>Linkage to other databases or death records</b> |                                | <ul style="list-style-type: none"> <li>No linkage to other IQVIA™ databases</li> <li>Linkage to death records available in a subgroup of patients (~20%)</li> </ul> | -                                                 | -                                                                                | -                                     | -                                                                         | -                                                        |

The data sources include both published and unpublished sources.

n.a.: not available

37  
38  
39  
40  
41  
42  
43  
44  
45  
46

## 221 Collected variables and data quality

222 Due to the use of health insurance data and rules for structuring billing data, all primary care databases  
223 generally contain data on patient demographics, drug prescriptions, diagnoses, and the frequency of  
224 physician-patient contacts (25).

225 Lab tests (e.g., HbA1c) and health utilization variables, such as referrals or hospitalizations, are  
226 recorded by all projects (Table S2). The majority of active projects (DA, MedVip, BeoNet-Hannover,  
227 BeoNet-Halle) extract vital signs (e.g., blood pressure, height, weight, and Body Mass Index [BMI]) as  
228 well as lifestyle-related factors (e.g., smoking status or allergies) (DA, BeoNet-Hannover, BeoNet-  
229 Halle). Free text fields are not exported in active projects for data protection reasons, but some project  
230 aims revolve around only extracting desired features from such entries (RADARplus, BeoNet-Halle).  
231 The MedVip project partially extracted free texts because of missing data protection regulations during  
232 that time. Regarding sociodemographic variables (e.g., education, income), number of children, or  
233 substance abuse, these variables are not systematically recorded in German PMS. These variables may  
234 be entered into structured or free text fields. To fill this information gap, some projects use  
235 standardized questionnaires (BeoNet-Hannover, BeoNet-Halle) given out to patients who consented.

236 The CONTENT project can be considered the only project that attempted to improve data quality at  
237 the point of data entry. Several quality circles were implemented and proposed solutions were  
238 discussed on a regular basis including training on ICPC-2 coding.

## 239 Recruitment strategies

240 Strategies to recruit GPs and other specialists comprise various financial and non-financial incentives  
241 (Table S3). The DA provides financial incentives of an undisclosed amount, supports practices by using  
242 the exporting software, and provides quarterly feedback reports. Its popularity further seems to  
243 contribute to its recruitment success.

244 Publicly funded projects use only some of these recruitment strategies along their project trajectories.  
245 Snowball recruitment is usually implemented at the start of the project to get it running. There have  
246 been some “cold” acquisition attempts (MedVip, RADARplus) including the distribution of circulars,  
247 but they were associated with low recruitment rates. Some projects use regular or one-time financial  
248 incentives (MedVip, BeoNet-Halle, and CONTENT) while others claim to support practices with  
249 establishing a research infrastructure (BeoNet-Hannover, BeoNet-Halle, and CONTENT). Regular  
250 feedback reports are provided by some projects (DA, MedVip, CONTENT, and BeoNet-Halle). CONTENT  
251 particularly targeted practices with long-term commitment and willingness to code with ICPC. It is also  
252 the only project that developed a protected access area where the patients’ own data could be  
253 accessed. BeoNet-Halle and RADARplus favor practices that integrate consent management.

## 254 Applications of the databases

255 A total of 240 publications were identified (Table S4). Most articles described applied studies (n=230)  
256 and 10 articles described methods (Figure 2). Methodologic studies mainly deal with project-specific  
257 issues, such as project descriptions or data collection issues. Of the 230 applied studies, 31% were  
258 industry-funded. Only 21 publications used data from more than one database. The mean time of  
259 recruitment varied from study to study. However, the overall mean time of recruitment across all  
260 studies was seven years in the DA, 4.75 years in MedVip, and three years in CONTENT.

### 261 **Figure 2: Flow diagram of the extracted articles and their arrangement**

262 Of the 240 publications included, 85% were contributed by the DA (Table S4).

1  
2  
3 263 Over the past two decades, the DA published a total of 205 articles on applied studies (*Figure 2*). Most  
4 264 of them (59%) deal with pharmacoepidemiologic topics including prescription patterns (n = 63) and  
5 265 studies on treatment outcomes, compliance, and treatment effectiveness (n = 38). Epidemiologic  
6 266 studies (36%) mainly focused on incidence and prevalence (n = 37) along with risk and comorbidity  
7 267 analysis (n = 29). A small proportion included health services research studies (n = 10) with topics such  
8 268 as hospitalization.

## 11 12 269 Discussion

13  
14 270 In 2018, a European ranking on the status of EHR implementation placed Germany at 16<sup>th</sup> out of 20  
15 271 analyzed countries. Especially Scandinavian countries, but also Estonia and the UK, can be considered  
16 272 precursors and pioneers in EHR implementation (26, 27). Estonia, for example, introduced a country-  
17 273 wide eHealth strategy in 2008 by relying on a mix of statutory financial incentives and sanctions to  
18 274 encourage providers to implement technology to build a consistent eHealth infrastructure (28). Not  
19 275 surprisingly, the pace of health system digitalization has highly impacted the development of primary  
20 276 care data collection projects and the production of evidence using EHR.

21  
22  
23 277 Many countries introduced primary care data collection projects already in the late 1990s contributing  
24 278 to many years of experience with EHRs (4). (4). For instance, the Clinical Practice Research Datalink  
25 279 (CPRD), a large representative EHR database from the UK, was set up in 1987 and provided data for  
26 280 over 3000 publications alone. This is more than 12 times the number of all German publications  
27 281 retrieved by the projects in the present review (29). Moreover, CPRD links ambulatory datasets to  
28 282 secondary care and death records, which is currently hampered in Germany due to data protection  
29 283 restrictions.

30  
31  
32 284 The success of projects like CPRD is also due to the measures of improving quality of data entry having  
33 285 been implemented early on in participating general practices. While documentation quality is  
34 286 important, another vital aspect here is the involvement of PMS vendors in adapting PMS to implement  
35 287 standardized fields instead of free text fields. As an example, symptoms in PMS in the UK may be  
36 288 entered using a preformatted drop-down menu, which makes them categorical variables.

37  
38  
39 289 One main reason for the slow development and short duration of the publicly funded primary care  
40 290 data collection projects identified by this scoping review might be a shortage of funding. Interestingly,  
41 291 only the early projects identified in this review had comparatively large public funding at their disposal.  
42 292 These projects also had a modest recruitment rate, compared to the most recent projects. The funding  
43 293 of recent active projects is small, especially compared to governmentally supported projects from  
44 294 other countries.

45  
46 295 The funding of the DA by pharmaceutical companies appears to contribute to its success. EHRs are  
47 296 particularly suited for pharmacoepidemiological research to detect uncommon and unexpected  
48 297 adverse events. In 2011, the European Commission issued the EU-ADR Project ("Exploring and  
49 298 Understanding Adverse Drug Reactions by integrative mining of clinical records and biomedical  
50 299 knowledge") to develop new methods for early detection and drug safety monitoring by combining  
51 300 large EHR databases (30).

52  
53  
54 301 Another problem seems to lie in the difficulty in extracting data from multiple PMS despite mandatory  
55 302 exchange interfaces like BDT or the "archive and exchange" interface mandated by § 371 Abs. 1 SGB V  
56 303 (31). The development of such standardized interfaces is a major collaborative work as several  
57 304 stakeholders are concerned with or affected by issues around the use of EHR data. These include  
58 305 patients and patient advocacy groups, PMS vendors and the vendor community, standards  
59 306 organizations, academic institutions, and others (3). National institutions are highly needed in the

process of standardization (11). Currently, interfaces based on HL7 FHIR standard are in development in the hospital sector (11). However, in ambulatory sector, no such standard is in development which is why we conclude that PMS vendors were generally successful in restricting any external software modification to their systems that impeded using EHRs more efficiently. Currently, it is not clear when the gradual conversion of PMS to FHIR formats will take place, which would be attractive for health care researchers in the face of interoperability (32).

The problem of data extraction is aggravated by most entries in German PMS being done in free text fields and because no data entry standard exists today. These free text fields cannot be fully anonymized. The close collaboration with the Medical Informatics Initiative (MII) regarding data protection issues and data linkage can be regarded as an important building block for the projects. The initiative was successful in developing the concept of a broad consent (33). Obtaining broad consent seems to be an inevitable requirement for obtaining unstructured medical data.

We therefore conclude that the ambulatory eHealth landscape in Germany is still not favorable for carrying out EHR research.

## Limitations

One major limitation of this scoping review is incomplete information about some projects. Some information, especially from the DA, is not publicly available due to company confidentiality reasons. A second limitation was mainly identified during the phase of classifying the publications. We developed our own classification system, as we were not able to identify a common classification method in the literature. Some publications listed by the projects' homepages were not included in our final analysis, because we were not able to verify that they included data using EHR databases. Furthermore, out of all publications we were only able to retrieve 210 full-text papers and many studies did not describe their study design in detail and might have been classified wrongly. Finally, we only used three literature databases for our investigation, including one database (LIVIVO) that also includes gray literature.

## Conclusion

The development and sustainability of German primary care data collection projects are hindered by limited funding, technical issues of data extraction, and strict data protection regulations. Interfaces for data exchange and research are still not sufficiently implemented. Questions of data quality remain as much of the information entered in PMS is done in free text fields, which can only partially be exported with patients' informed consent. This limits the scope of publications identified in this review mainly to (pharmaco-)epidemiologic topics from one privately funded database. The full potential of research that is possible using EHRs is therefore still not realized in Germany.

## References

1. The Office of the National Coordinator for Health Information Technology (ONC). FAQ: what is an electronic health record 2023 [Available from: [https://www.healthit.gov/faq/what-electronic-health-record-ehr#:~:text=An%20electronic%20health%20record%20\(EHR\)%20is%20a%20digital%20version%20of, and%20securely%20to%20authorized%20users.](https://www.healthit.gov/faq/what-electronic-health-record-ehr#:~:text=An%20electronic%20health%20record%20(EHR)%20is%20a%20digital%20version%20of, and%20securely%20to%20authorized%20users.)
2. Modi S, Feldman SS. The Value of Electronic Health Records Since the Health Information Technology for Economic and Clinical Health Act: Systematic Review. *JMIR Med Inform.* 2022;10(9):e37283.

- 3 349 3. Nordo AH, Levaux HP, Becnel LB, Galvez J, Rao P, Stem K, et al. Use of EHRs data for clinical  
4 350 research: Historical progress and current applications. *Learn Health Syst.* 2019;3(1):e10076.
- 5 351 4. Gentil ML, Cuggia M, Fiquet L, Hagenbourger C, Le Berre T, Banatre A, et al. Factors influencing  
6 352 the development of primary care data collection projects from electronic health records: a systematic  
7 353 review of the literature. *BMC Med Inform Decis Mak.* 2017;17(1):139.
- 8 354 5. Swart E, Gothe H, Hoffmann F, Ihle P, Schubert I, Stallmann C, et al. Sonderheft Methodische  
9 355 Aspekte der Sekundärdatenanalyse. *Gesundheitswesen.* 2020;82(S 01):S1-S3.
- 10 356 6. Schubert I, Köster I, Küpper-Nybelen J, Ihle P. [Health services research based on routine data  
11 357 generated by the SHI. Potential uses of health insurance fund data in health services research].  
12 358 *Bundesgesundheitsblatt Gesundheitsforschung Gesundheitsschutz.* 2008;51(10):1095-105.
- 13 359 7. Akmatov MK, Holstiege J, Steffen A, Bätzing J. Utilization of influenza vaccination among  
14 360 chronically ill individuals in Germany: A nationwide claims-based analysis. *Vaccine.* 2021;39(6):952-60.
- 15 361 8. Blümel M, Spranger A, Achstetter K, Maresso A, Busse R. Germany: Health System Review.  
16 362 *Health Syst Transit.* 2020;22(6):1-272.
- 17 363 9. Gemeinsamer Bundesausschuss. Innovationsfonds 2022 [Available from:  
18 364 <https://innovationsfonds.g-ba.de/>.
- 19 365 10. Bundesministerium für Bildung und Forschung. Allgemeinmedizin: Liste der abgeschlossenen  
20 366 Vorhaben 2022 [Available from: <https://www.gesundheitsforschung-bmbf.de/de/allgemeinmedizin-2624.php>.  
21 367
- 22 368 11. Gematik. Informations-technische Systeme im Kranken-haus 2022 [Available from:  
23 369 <https://fachportal.gematik.de/informationen-fuer/isik#c3740>.
- 24 370 12. Mach Sv. Praxis-Software: Leichter zum PVS-Wechsel? : hausarzt.digital; 2021 [Available from:  
25 371 <https://www.hausarzt.digital/praxis/praxisfuehrung/leichter-zum-pvs-wechsel-95031.html>.
- 26 372 13. Kassenärztliche Bundesvereinigung. KBV-Installationsstatistik. 2022. [Available from:  
27 373 [https://www.kbv.de/media/sp/Gesamt\\_Systeme\\_Installationen.pdf](https://www.kbv.de/media/sp/Gesamt_Systeme_Installationen.pdf).
- 28 374 14. Statista. Anzahl ambulanter ärztlicher Behandlungsfälle und behandelter Personen in  
29 375 Deutschland in den Jahren 2004 bis 2020. 2020 [Available from:  
30 376 [https://de.statista.com/statistik/daten/studie/75608/umfrage/von-aerzten-behandelte-personen-  
31 377 und-aerztliche-](https://de.statista.com/statistik/daten/studie/75608/umfrage/von-aerzten-behandelte-personen-und-aerztliche-).
- 32 378 15. Casey JA, Schwartz BS, Stewart WF, Adler NE. Using Electronic Health Records for Population  
33 379 Health Research: A Review of Methods and Applications. *Annu Rev Public Health.* 2016;37:61-81.
- 34 380 16. Kruse CS, Stein A, Thomas H, Kaur H. The use of Electronic Health Records to Support  
35 381 Population Health: A Systematic Review of the Literature. *J Med Syst.* 2018;42(11):214.
- 36 382 17. Cowie MR, Blomster JI, Curtis LH, Duclaux S, Ford I, Fritz F, et al. Electronic health records to  
37 383 facilitate clinical research. *Clin Res Cardiol.* 2017;106(1):1-9.
- 38 384 18. Tricco AC, Lillie E, Zarin W, O'Brien KK, Colquhoun H, Levac D, et al. PRISMA Extension for  
39 385 Scoping Reviews (PRISMA-ScR): Checklist and Explanation. *Ann Intern Med.* 2018;169(7):467-73.
- 40 386 19. Statistisches Bundesamt. Datenquelle: IQVIATM Disease Analyzer 2023 [Available from:  
41 387 [https://www.gbe-  
42 388 bund.de/gbe/ergebnisse.prc\\_tab?fid=453&suchstring=&query\\_id=&sprache=D&fund\\_typ=DQ&meth  
43 389 ode=&vt=&verwandte=1&page\\_ret=0&seite=1&p\\_sprachkz=D&p\\_uid=&p\\_lfd\\_nr=&p\\_news=&p\\_aid  
44 390 =&hlp\\_nr=&p\\_janein=](https://www.gbe-bund.de/gbe/ergebnisse.prc_tab?fid=453&suchstring=&query_id=&sprache=D&fund_typ=DQ&methode=&vt=&verwandte=1&page_ret=0&seite=1&p_sprachkz=D&p_uid=&p_lfd_nr=&p_news=&p_aid=&hlp_nr=&p_janein=).
- 45 391 20. Bahls T, Pung J, Heinemann S, Hauswaldt J, Demmer I, Blumentritt A, et al. Designing and  
46 392 piloting a generic research architecture and workflows to unlock German primary care data for  
47 393 secondary use. *J Transl Med.* 2020;18(1):394.
- 48 394 21. Becher H, Kostev K, Schroder-Bernhardi D. Validity and representativeness of the "Disease  
49 395 Analyzer" patient database for use in pharmacoepidemiological and pharmaco-economic studies. *Int J  
50 396 Clin Pharmacol Ther.* 2009;47(10):617-26.
- 51 397 22. Laux G, Koerner T, Rosemann T, Beyer M, Gilbert K, Szecsenyi J. The CONTENT project: a  
52 398 problem-oriented, episode-based electronic patient record in primary care. *Inform Prim Care.*  
53 399 2005;13(4):249-55.

- 1  
2  
3 400 23. World Organization of Family Doctors. International Classification of Primary Care 2016  
4 401 [Available from: [https://www.globalfamilydoctor.com/site/DefaultSite/filesystem/documents/Groups/WICC/Internati](https://www.globalfamilydoctor.com/site/DefaultSite/filesystem/documents/Groups/WICC/International%20Classification%20of%20Primary%20Care%20Dec16.pdf)  
5 402 [onal%20Classification%20of%20Primary%20Care%20Dec16.pdf](https://www.globalfamilydoctor.com/site/DefaultSite/filesystem/documents/Groups/WICC/International%20Classification%20of%20Primary%20Care%20Dec16.pdf).  
6 403  
7 404 24. BeoNet-Halle Group. BeoNet-Halle Homepage 2022 [Available from: [https://webszh.uk-](https://webszh.uk-halle.de/beonet/)  
8 405 [halle.de/beonet/](https://webszh.uk-halle.de/beonet/).  
9 406 25. Kassenärztliche Bundesvereinigung. IT in der Arztpraxis: Datensatzbeschreibung KVDT 2023  
10 407 2023 [Available from: [https://update.kbv.de/ita-](https://update.kbv.de/ita-update/Abrechnung/KBV_ITA_VGEX_Datensatzbeschreibung_KVDT.pdf)  
11 408 [update/Abrechnung/KBV\\_ITA\\_VGEX\\_Datensatzbeschreibung\\_KVDT.pdf](https://update.kbv.de/ita-update/Abrechnung/KBV_ITA_VGEX_Datensatzbeschreibung_KVDT.pdf).  
12 409 26. Bertram N, Püschner F, Gonçalves ASO, Binder S, Amelung VE. Einführung einer elektronischen  
13 410 Patientenakte in Deutschland vor dem Hintergrund der internationalen Erfahrungen. In: Klauber J,  
14 411 Geraedts M, Friedrich J, Wasem J, editors. Krankenhaus-Report 2019: Das digitale Krankenhaus. Berlin,  
15 412 Heidelberg: Springer Berlin Heidelberg; 2019. p. 3-16.  
16 413 27. Amelung V BS, Bertram N, Chase DP, Urbanski D. Die elektronische Patientenakte – Fundament  
17 414 einer effektiven und effizienten Gesundheitsversorgung. Heidelberg: medhochzwei Verlag; 2016.  
18 415 28. World Health Organization. Regional Office for Europe EOoHSaP, Habicht, Triin, Reinap, Marge,  
19 416 Kasekamp, Kaija. et al. Estonia: health system review. . Regional Office for Europe.: World Health  
20 417 Organization.; 2018.  
21 418 29. CPRD. Clinical Practice Research Datalink 2022 [Available from: <https://cprd.com/>.  
22 419 30. Coloma PM, Schuemie MJ, Trifiro G, Gini R, Herings R, Hippisley-Cox J, et al. Combining  
23 420 electronic healthcare databases in Europe to allow for large-scale drug safety monitoring: the EU-ADR  
24 421 Project. *Pharmacoepidemiol Drug Saf.* 2011;20(1):1-11.  
25 422 31. Bundesministerium der Justiz. Integration offener und standardisierter Schnittstellen in  
26 423 informationstechnische Systeme 2022 [Available from: [https://www.gesetze-im-](https://www.gesetze-im-internet.de/sgb_5/_371.html)  
27 424 [internet.de/sgb\\_5/\\_371.html](https://www.gesetze-im-internet.de/sgb_5/_371.html).  
28 425 32. Ayaz M, Pasha MF, Alzahrani MY, Budiarto R, Stiawan D. The Fast Health Interoperability  
29 426 Resources (FHIR) Standard: Systematic Literature Review of Implementations, Applications, Challenges  
30 427 and Opportunities. *JMIR Med Inform.* 2021;9(7):e21929.  
31 428 33. Medizininformatikinitiative. Template text for patient consent forms 2023 [Available from:  
32 429 <https://www.medizininformatik-initiative.de/en/template-text-patient-consent-forms>.  
33  
34  
35  
36  
37  
38  
39

## 430 Abbreviations

40 431 BDT: Behandlungsdatentransfer; BeoNet: Beobachtungspraxen-Netzwerk; BMBF: Bundesministerium  
41 432 für Bildung und Forschung (Federal Ministry of Education and Research); BMI: Body Mass Index;  
42 433 CONTENT: CONTInuous morbidity registration Epidemiologic NeTwork; CPRD: Clinical Practice  
43 434 Research Datalink; DA: Disease Analyzer; EHR: Electronic Health Record; GP: general practitioner; HL7  
44 435 FHIR: Health Level 7 Fast Health Interoperability Resource; ICPC: International Classification of Primary  
45 436 Care; MedVip: Medizinische Versorgung in Praxen; MeSH: Medical Subject Headings; MII: Medical  
46 437 Informatics Initiative; n. a.: not available; PI: principal investigator; PMS: Practice management system;  
47 438 PRISMA-ScR: Preferred Reporting Items for Systematic Reviews and Meta-Analyses extension for  
48 439 Scoping Reviews; RADARplus: Routine Anonymised Data for Advanced Health Services Research plus.  
49  
50  
51  
52

## 53 440 Supplementary Information

54 441 Table S1: Search Strings. Table S2: Collected Variables. Table S3: Data evaluation, access, and  
55 442 recruitment. Table S4: List of included studies.  
56  
57  
58

## 59 443 Acknowledgements

60 444 For proofreading we acknowledge Dawn M. Bielawski, PhD.



## 445 Authors' contributions

446 KM, JM, and SU developed the methodological concept. KM, JM, and JS screened study titles and  
447 abstracts and examined the full texts for inclusion. KM, JM, JS, and PJ developed the figures and tables.  
448 All authors participated in reading and approving the final manuscript.

## 449 Funding

450 This study received no funding.

## 451 Availability of data and materials

452 All data generated and analyzed by this study are included in this published article.

## 453 Declarations

### 454 Ethics approval and consent to participate

455 Not applicable.

### 456 Consent for publication

457 Not applicable.

### 458 Competing interests

459 The authors have confirmed that we have no competing interests.

Figure 1: PRISMA 2020 flow diagram for new systematic reviews which included searches of databases and registers only

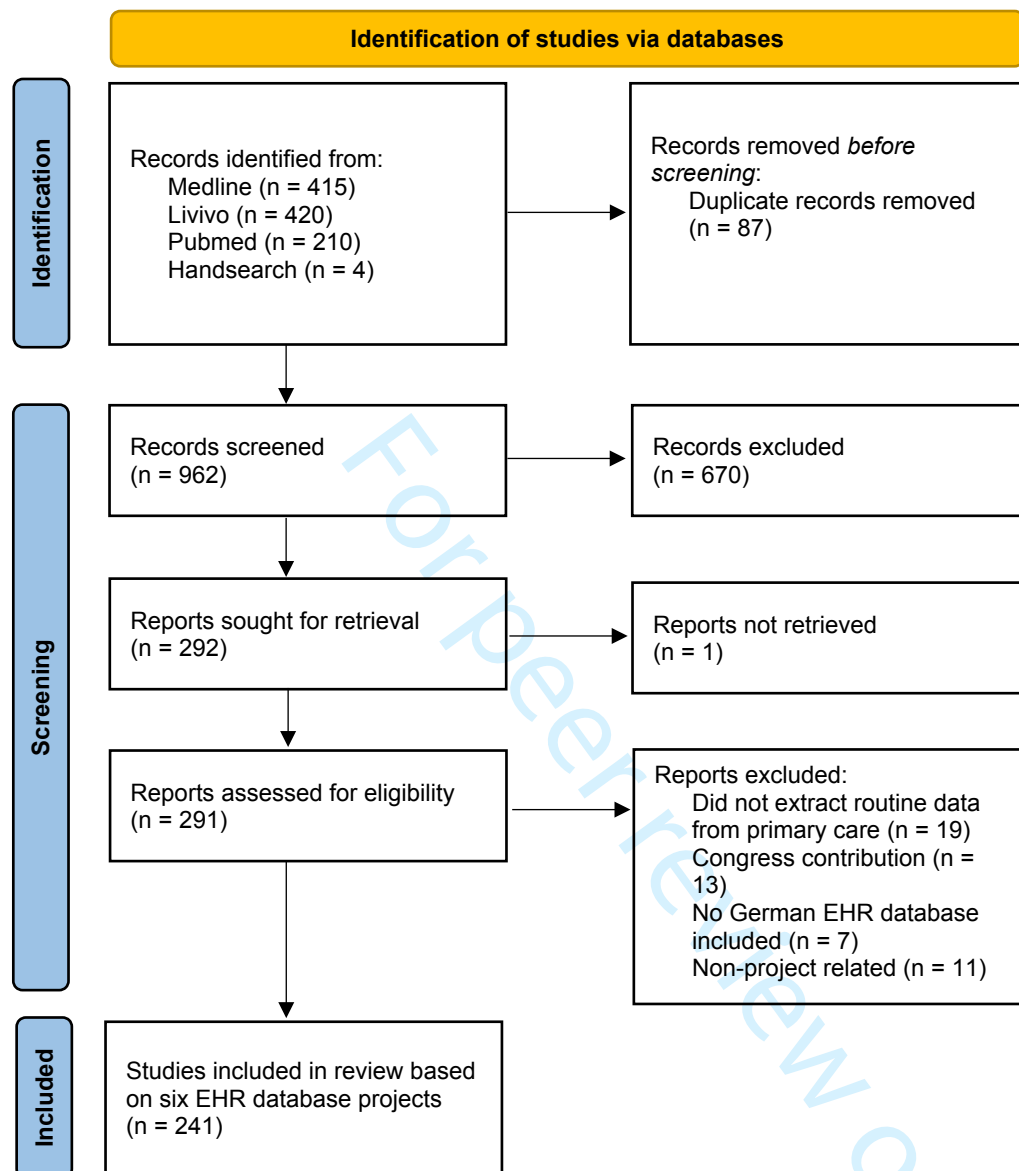

1  
2  
3  
4  
5  
6  
7  
8  
9  
10  
11  
12  
13  
14  
15  
16  
17  
18  
19  
20  
21  
22  
23  
24  
25  
26  
27  
28  
29  
30  
31  
32  
33  
34  
35  
36  
37  
38  
39  
40  
41

**Figure 2: Flow diagram of the extracted articles and their arrangement**

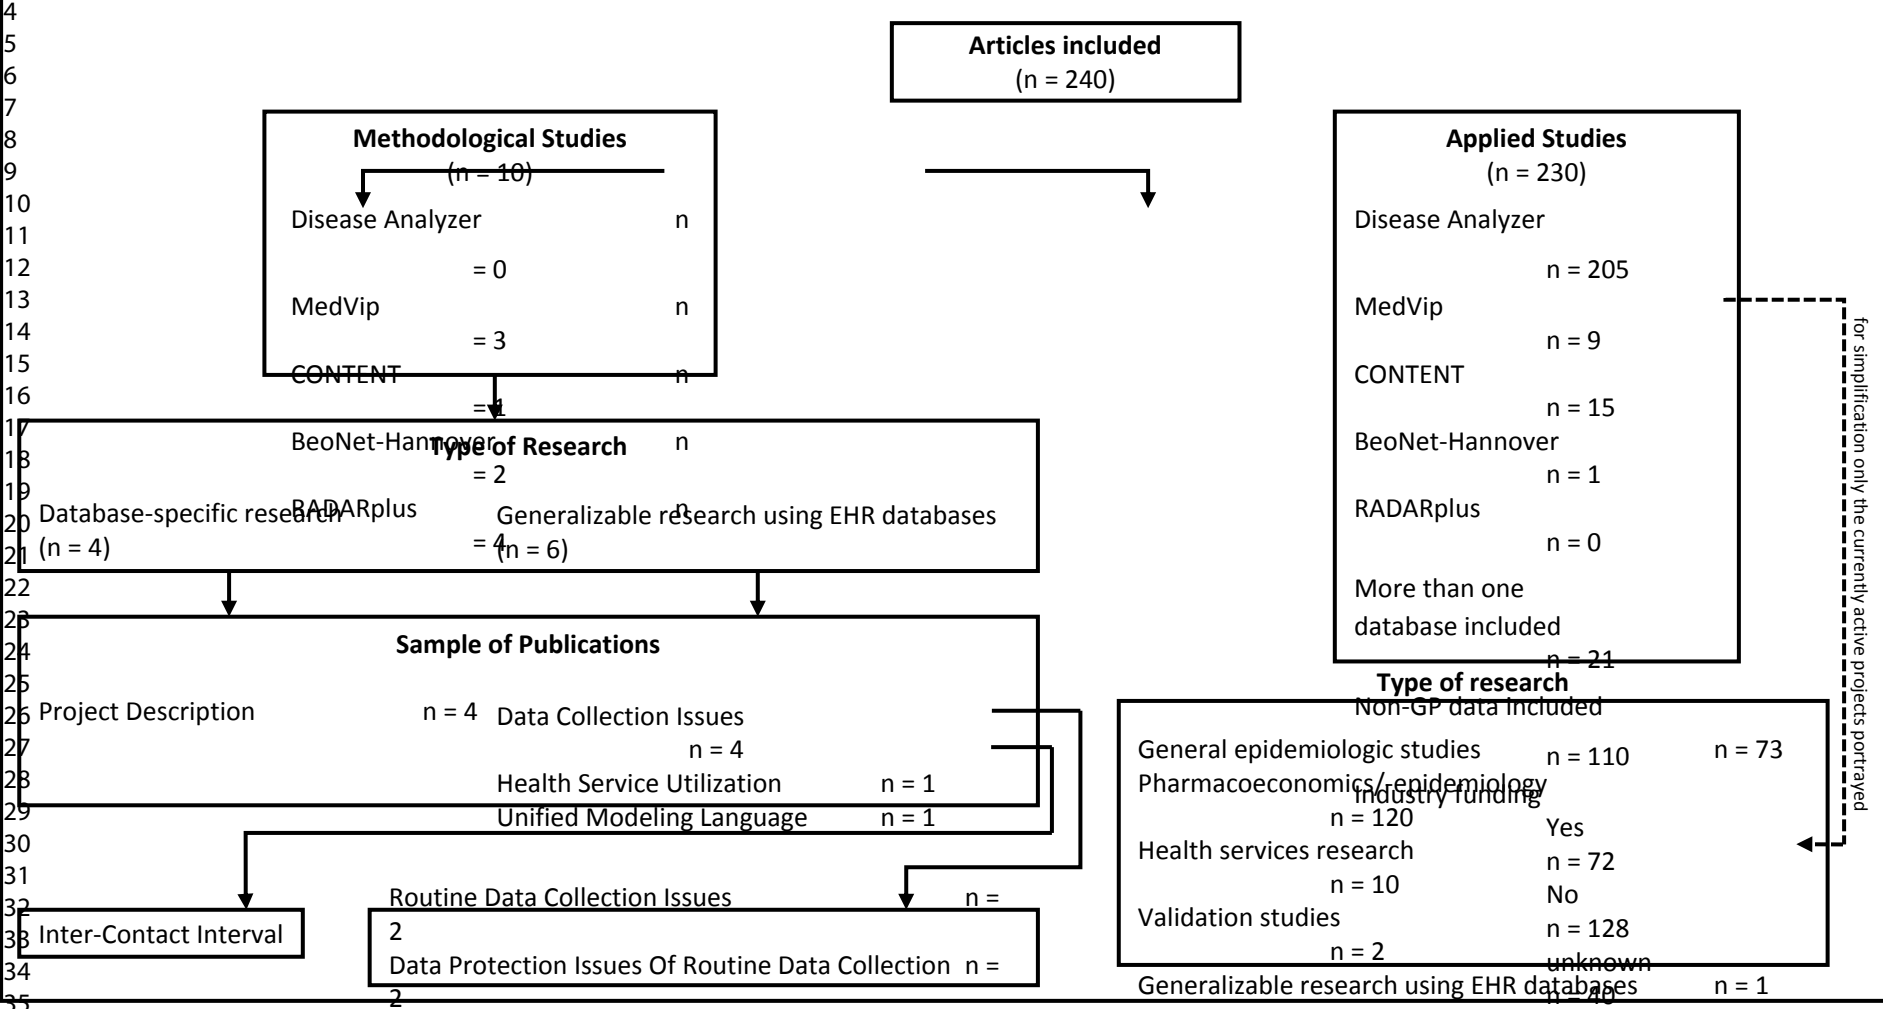

| Set | Search Statement                                                           | Results |
|-----|----------------------------------------------------------------------------|---------|
| 1.  | exp Primary Health Care/                                                   |         |
| 2.  | exp General Practice/                                                      |         |
| 3.  | general practitioners/ or physicians, family/ or physicians, primary care/ |         |
| 4.  | general practi*.tw.                                                        |         |
| 5.  | (primary adj3 care).tw.                                                    |         |
| 6.  | (family adj3 (practi* or doctor or physician*)).tw.                        |         |
| 7.  | or/1-6                                                                     |         |
| 8.  | exp medical records/                                                       |         |
| 9.  | exp routinely collected health data/                                       |         |
| 10. | (routine* adj3 (collect* or record* or document*)).tw.                     |         |
| 11. | health servic* research.tw.                                                |         |
| 12. | (electronic adj3 record*).tw.                                              |         |
| 13. | CONTinuous morbidity registration Epidemiologic NeTwork.tw.                |         |
| 14. | Disease Analyzer.tw.                                                       |         |
| 15. | or/8-14                                                                    |         |
| 16. | exp Germany/                                                               |         |
| 17. | German*.tw.                                                                |         |
| 18. | or/16-17                                                                   |         |
| 19. | 7 and 15 and 18                                                            | 415     |

## Search Strategies

Table 1: Search String for Ovid (June 2022)

Table 2: Search String LIVIVO (June 2022)

| Set | Search Statement              | Results |
|-----|-------------------------------|---------|
| 1   | Haus?rzt                      |         |
| 2   | Primär?rzt*                   |         |
| 3   | Allgemein?rztlich*            |         |
| 4   | Allgemeinmedizin*             |         |
| 5   | Ambulant*                     |         |
| 6   | OR 1-5                        |         |
| 7   | Routinedaten*                 |         |
| 8   | BDT                           |         |
| 9   | Elektronische* Patientenakte* |         |
| 10  | OR 7-9                        |         |
| 11  | 6 AND 10                      | 420     |

## Pubmed (NLM)

Search terms (June 2022):

"Germany"[All Fields] AND "Disease Analyzer"[All Fields]

**210 studies were imported**

Table S2: Collected variables

|                        |                          | <b>IQVIA™ Disease Analyzer</b> | <b>BeoNet Halle</b> | <b>BeoNet Hannover</b> | <b>CONTENT</b> | <b>MedVip</b> | <b>RADARplus</b> |
|------------------------|--------------------------|--------------------------------|---------------------|------------------------|----------------|---------------|------------------|
| Physician types        | All                      | ✓                              | ✓                   | -                      | -              | -             | -                |
|                        | GP                       | ✓                              | ✓                   | ✓                      | ✓              | ✓             | ✓                |
|                        | Pneumologists            | ✓                              | ✓                   | ✓                      | -              | -             | -                |
|                        | Paediatricians           | ✓                              | ✓                   | -                      | -              | -             | -                |
|                        | Internists               | ✓                              | ✓                   | -                      | ✓              |               | ✓                |
| Physician demographics | Physician number         | -                              | ✓                   | ✓                      | -              | unknown       | unknown          |
|                        | Age                      | ✓                              | ✓                   | -                      | ✓              | -             | -                |
|                        | Gender                   | ✓                              | ✓                   | -                      | ✓              | -             | -                |
|                        | Years in practice        | ✓                              | ✓                   | -                      | ✓              | -             | -                |
| Practices demographics | Type                     | ✓                              | ✓                   | ✓                      | ✓              | -             | ✓                |
|                        | Region                   | ✓                              | ✓                   | ✓                      | ✓              | ✓             | ✓                |
|                        |                          | east or west                   | east or west        |                        | east or west   |               |                  |
|                        | Frequency of patients    | ✓                              | ✓                   | ✓                      |                |               |                  |
|                        | No. of doctors           | ✓                              | ✓                   | ✓                      | ✓              |               |                  |
|                        | No. of employees         | ✓                              | ✓                   | ✓                      | ✓              |               |                  |
| Patient demographics   | Age                      | ✓                              | ✓                   | ✓                      | ✓              | ✓             | ✓                |
|                        | Gender                   | ✓                              | ✓                   | ✓                      | ✓              | ✓             | ✓                |
|                        | Patient since            | -                              | ✓                   | ✓                      | -              | -             | -                |
|                        | Employment               | -                              | -                   | ✓                      | ✓              | -             | -                |
|                        | Medical insurance status | ✓                              | ✓                   | ✓                      | ✓              | -             | -                |

|                                 |                                                                                              |                        |                                                                                    |                                                                             |                                                                                                   |                                                          |                                                                                       |
|---------------------------------|----------------------------------------------------------------------------------------------|------------------------|------------------------------------------------------------------------------------|-----------------------------------------------------------------------------|---------------------------------------------------------------------------------------------------|----------------------------------------------------------|---------------------------------------------------------------------------------------|
|                                 |                                                                                              | (private or statutory) | (private or statutory)                                                             | (private or statutory)                                                      | (private or statutory)                                                                            |                                                          |                                                                                       |
|                                 | Medical insurance provider                                                                   | ✓                      | -                                                                                  | ✓                                                                           | -                                                                                                 | -                                                        | -                                                                                     |
|                                 | Region                                                                                       | ✓<br>east or west      | ✓                                                                                  | ✓                                                                           | ✓                                                                                                 | -                                                        | -                                                                                     |
|                                 | Nationality                                                                                  | ?                      | ✓                                                                                  | ✓                                                                           | ✓                                                                                                 | -                                                        | -                                                                                     |
| BMI and risk factors            | BMI; smoking and alcohol recording rarely documented (~5%)                                   |                        | BMI, BP, HR, allergies, accidents, operations smoking status                       | BMI, risk factors, allergies                                                | unknown                                                                                           | smoking                                                  | -                                                                                     |
| Social history                  | unknown                                                                                      |                        | -                                                                                  | -                                                                           | unknown                                                                                           | -                                                        | -                                                                                     |
| Pregnancy or family status      | Pregnancy variable, gynecologist records; family data incomplete                             |                        | pregnancy, number of children                                                      | pregnancy, number of children                                               | unknown                                                                                           | -                                                        | -                                                                                     |
| Diagnosis                       | Diagnosis, ICD 10 codes and original text                                                    |                        | symptoms, medical history, ICD 10 codes and original text, billing codes           | medical history, ICD 10 codes and original text, billing codes              | reasons for encounter, medical history, ICD 10 codes and original text, billing codes, ICPC codes | Diagnosis, ICD 10 codes and original text, billing codes | Diagnosis (date, long-term and acute), ICD 10 codes and original text, billing codes, |
| procedures, findings, therapies | lab test results; other test results variably available or can be requested from paper files |                        | lab and X-ray test results, blood pressure, internal and external findings,        | lab and X-ray test results, blood pressure, internal and external findings, | lab test results                                                                                  | unknown                                                  | laboratory test results, therapy                                                      |
| drug information                | Drug name, route, dosage, frequency, duration, cost of therapy                               |                        | drug name and ATC code, (long term) medication, dosage, frequency, cost of therapy | drug name and ATC code, (long term) medication, cost of therapy             | Drug name, long term medication, dosage, cost of therapy                                          | Drug name                                                | drug name, long-term medication, date                                                 |

|                              |                                                                                |                                                                                   |                                                                          |                                                                                                |                                                                           |                                                                           |
|------------------------------|--------------------------------------------------------------------------------|-----------------------------------------------------------------------------------|--------------------------------------------------------------------------|------------------------------------------------------------------------------------------------|---------------------------------------------------------------------------|---------------------------------------------------------------------------|
| Healthcare utilization       | Practice visits, referrals, sick leave, hospitalizations                       | referrals, sick leave, hospitalizations                                           | referrals, sick leave, hospitalizations                                  | Practice visits, referrals, sick leave, hospitalizations                                       | unknown                                                                   | referrals, sick leave, hospitalizations                                   |
| Images (e.g X-ray)           | Unknown                                                                        | No                                                                                | No                                                                       | No                                                                                             | No                                                                        | No                                                                        |
| Questionnaires and other CRF | yes, QoL questionnaires upon request                                           | yes, study specific                                                               | yes, study specific                                                      | n. a.                                                                                          | yes, study specific                                                       | yes, study specific                                                       |
| <b>Missing Data</b>          | Social, economic data (salary, family status, employment), secondary care data | secondary care data, social and economic data (salary, family status, employment) | vaccination social and economic data (salary, family status, employment) | vaccination, secondary care data, social and economic data (salary, family status, employment) | vaccination, social and economic data (salary, family status, employment) | vaccination, social and economic data (salary, family status, employment) |



1  
2  
3  
4  
5  
6  
7  
8  
9  
10  
11  
12  
13  
14  
15  
16  
17  
18  
19  
20  
21  
22  
23  
24  
25  
26  
27  
28  
29  
30  
31  
32  
33  
34  
35  
36  
37  
38  
39  
40  
41  
42  
43  
44  
45  
46

Table S3: Data evaluation and access and recruitment

|                                      | <b>IQVIA™ Disease Analyzer</b>  | <b>BeoNet Halle</b>                             | <b>BeoNet Hannover</b>                          | <b>CONTENT</b>                                                                           | <b>MedVip</b>                              | <b>RADARplus</b>                           |
|--------------------------------------|---------------------------------|-------------------------------------------------|-------------------------------------------------|------------------------------------------------------------------------------------------|--------------------------------------------|--------------------------------------------|
| In-house data evaluation             | ✓                               | ✓                                               | ✓                                               | ✓                                                                                        | ✓                                          | ✓                                          |
| Feedback reports to practices        | ✓                               | ✓                                               | ✓                                               | ✓                                                                                        | ✓                                          | n.a.                                       |
| Interim project reports              | n.a.                            | ✓                                               | ✓                                               | ✓                                                                                        | ✓                                          | n.a.                                       |
| Internal practice data accessibility | -                               | -                                               | -                                               | ✓                                                                                        | -                                          | -                                          |
| External data access                 | ✓                               | ✓                                               | -                                               | -                                                                                        | -                                          | ✓                                          |
| Financial incentives                 | Yes, but amount unknown         | 2 € per signed broad consent                    | -                                               | Quarterly 375 € per practice                                                             | 500 € once per physician                   | unknown                                    |
| Type of physician support            | support how to use the software | establishing a practice research infrastructure | establishing a practice research infrastructure | Training in ICPC coding, hotline for software problems & regular quality circle meetings | On-site support to extract requested data. | On-site support to extract requested data. |
| Recruitment Strategy                 | Snowball                        | n.a.                                            | ✓                                               | ✓                                                                                        | -                                          | -                                          |
|                                      | Presentations                   | n.a.                                            | ✓                                               | -                                                                                        | ✓                                          | ✓                                          |
|                                      | Circulars                       | n.a.                                            | -                                               | -                                                                                        | ✓                                          | ✓                                          |
|                                      | Articles                        | n.a.                                            | ✓                                               | ✓                                                                                        | ✓                                          | with 2 reminders<br>✓                      |
|                                      | Homepage                        | n.a.                                            | ✓                                               | ✓                                                                                        | ✓                                          | -<br>E-Mail & written                      |
| Patient recruiter                    | -                               | Attending physician or study nurse              | Attending physician                             | -                                                                                        | Attending physician                        | Trusted third party                        |
| n.a.: not available                  |                                 |                                                 |                                                 |                                                                                          |                                            |                                            |

| DOI                            | Title                         | Authors                             | First Author   | Journal                          | Publication year | Project          |
|--------------------------------|-------------------------------|-------------------------------------|----------------|----------------------------------|------------------|------------------|
| 10.1136/ard.2008.015111        | Gout in the UK                | L. Annemans; J. Bohlken; K. Bohlken | Annemans L     | Annals of the Rheumatic Diseases | 2008             | Disease Analysis |
| 10.3233/jad-19-0300            | Relevance of Coded Prevalence | J. Bohlken; K. Bohlken              | Bohlken J      | J Alzheimers Dis                 | 2018             | Disease Analysis |
| 10.3233/jad-19-0301            | Diagnostic Beliefs            | J. Bohlken; K. Bohlken              | Bohlken J      | J Alzheimers Dis                 | 2019             | Disease Analysis |
| 10.3233/jad-19-0302            | Diagnostic Beliefs            | J. Bohlken; K. Bohlken              | Bohlken J      | J Alzheimers Dis                 | 2019             | Disease Analysis |
| 10.1017/S104795181600004       | Risk factors for depression   | A. Booker; L. E. Booker             | Booker A       | Int Psychogeriatr                | 2016             | Disease Analysis |
| 10.5414/cp20-21-0000           | Prevalence of depression      | L. Cirkel; M. K. Cirkel             | Cirkel L       | Int J Clin Pharm                 | 2021             | Disease Analysis |
| 10.1016/j.yebeh.2021.03.001    | Epilepsy is associated with   | C. Doege; M. E. Doege               | Doege C        | Epilepsy Behav                   | 2021             | Disease Analysis |
| 10.1016/j.yebeh.2022.03.001    | Atrial fibrillation and       | C. Doege; M. E. Doege               | Doege C        | Epilepsy Behav                   | 2022             | Disease Analysis |
| 10.1016/j.jpsy.2021.03.001     | Factors associated with       | M. Drewes; M. E. Drewes             | Drewes M       | J Psychiatr Res                  | 2021             | Disease Analysis |
| 10.1007/s00113-016-0001-1      | Depression risk factors       | J. Drosselmeyer; M. E. Drosselmeyer | Drosselmeyer J | Osteoporos Int                   | 2016             | Disease Analysis |
| 10.22074/ijfs.2022.0000        | Germany Endometriosis         | J. Göhring; M. E. Göhring           | Göhring J      | Int J Fertil Steril              | 2022             | Disease Analysis |
| 10.1007/s00435-015-0004-1      | Cancer is associated with     | L. Jacob; K. Köhler                 | Jacob L        | Journal of cancer                | 2015             | Disease Analysis |
| 10.1007/s00435-016-0004-1      | Prevalence of depression      | L. Jacob; L. Blöchl                 | Jacob L        | J Cancer Res Clin                | 2016             | Disease Analysis |
| 10.1016/j.yebeh.2019.03.001    | Incidence of epilepsy         | L. Jacob; J. Böhm                   | Jacob L        | Epilepsy & Behav                 | 2019             | Disease Analysis |
| 10.1016/j.jad.2019.03.001      | Association between           | L. Jacob; C. Geisler                | Jacob L        | J Affect Disord                  | 2019             | Disease Analysis |
| 10.1055/s-003-12345            | Pregnancy and depression      | N. Kalousidou; M. E. Kalousidou     | Kalousidou N   | Z Geburtshilfe                   | 2015             | Disease Analysis |
| 10.1515/jpem.2016.0000         | Prevalence of depression      | T. M. Kapellen; M. E. Kapellen      | Kapellen TM    | J Pediatr Endocrinol             | 2016             | Disease Analysis |
| 10.1177/205072912095000        | Non-alcoholic fatty liver     | L. Kaps; C. Labenz                  | Kaps L         | United European Gastroenterol    | 2020             | Disease Analysis |
| 10.1038/s41551-022-0000-0      | Age- and gender-specific      | S. J. Kim-Dorner; M. E. Kim-Dorner  | Kim-Dorner S   | NPJ Prim Care                    | 2022             | BeoNet-Hannover  |
| 10.1017/s104795181600004       | Depression risk factors       | M. Konrad; J. Köhler                | Konrad M       | International Journal of         | 2016             | Disease Analysis |
| 10.1016/j.jad.2020.03.001      | Increased prevalence of       | M. Konrad; K. Köhler                | Konrad M       | Journal of Affective             | 2020             | Disease Analysis |
| 10.1016/j.jval.2013.03.001     | Risk of psychiatric           | K. Kostev; J. R. Kostev             | Kostev K       | Value in Health                  | 2013             | Disease Analysis |
| 10.1016/j.pcd.2014.03.001      | Predictors of psychiatric     | K. Kostev; F. V. Kostev             | Kostev K       | Primary Care                     | 2014             | Disease Analysis |
| 10.1016/j.pcd.2014.03.002      | Prevalence and risk           | K. Kostev; A. J. Kostev             | Kostev K       | Primary Care                     | 2014             | Disease Analysis |
| 10.3205/0002-1234              | Risk of hypoglycemia          | K. Kostev; F. V. Kostev             | Kostev K       | Ger Med Sci                      | 2015             | Disease Analysis |
| 10.1097/xce.0b013e318170000    | Prevalence of cardiovascular  | K. Kostev; K. G. Kostev             | Kostev K       | Cardiovasc Eng                   | 2017             | Disease Analysis |
| 10.5414/cp20-21-0000           | Prevalence and risk           | K. Kostev; M. E. Kostev             | Kostev K       | Int. Journal of                  | 2021             | Disease Analysis |
| 10.1007/s00707-021-0000-0      | Increase in depression        | K. Kostev; K. V. Kostev             | Kostev K       | Eur Child Adolesc                | 2021             | Disease Analysis |
| 10.1016/j.yebeh.2021.03.001    | Predicting the risk of        | K. Kostev; T. V. Kostev             | Kostev K       | Epilepsy Behav                   | 2021             | Disease Analysis |
| 10.1111/dme.14567              | Effects of the ketogenic      | B. Kowall; K. Köhler                | Kowall B       | Diabet Med                       | 2022             | Disease Analysis |
| 10.1002/ueg2.1234              | Impact of thyroid             | C. Labenz; K. Köhler                | Labenz C       | United European Gastroenterol    | 2021             | Disease Analysis |
| 10.1007/s10647-021-0000-0      | Incident Diabetes             | C. Labenz; K. Köhler                | Labenz C       | Dig Dis Sci                      | 2021             | Disease Analysis |
| 10.1055/a-1378-0000            | Impact of Non-alcoholic       | C. Labenz; K. Köhler                | Labenz C       | Exp Clin Endocrinol              | 2022             | Disease Analysis |
| 10.1111/ejh.12345              | Epidemiology of               | M. Levi; M. R. Levi                 | Levi M         | European Journal of              | 2016             | Disease Analysis |
| 10.1136/bmj.d1234              | Variables associated with     | S. H. Loosen; M. E. Loosen          | Loosen S       | BMJ Open Diabetes                | 2021             | Disease Analysis |
| 10.3390/jcm12030000            | Incidence of COVID-19         | S. H. Loosen; M. E. Loosen          | Loosen S       | J Clin Med                       | 2021             | Disease Analysis |
| 10.1007/s00435-021-0000-0      | Low blood levels of           | S. H. Loosen; M. E. Loosen          | Loosen S       | J Cancer Res Clin                | 2021             | Disease Analysis |
| 10.1007/s00381-021-0000-0      | Diverticular disease          | S. H. Loosen; M. E. Loosen          | Loosen S       | Int J Colorectal Dis             | 2021             | Disease Analysis |
| 10.1055/a-1456-0000            | Non-alcoholic fatty liver     | S. H. Loosen; M. E. Loosen          | Loosen S       | Z Gastroenterol                  | 2021             | Disease Analysis |
| 10.1097/meg.2022.03.001        | An elevated Ferritin          | S. Loosen; M. E. Loosen             | Loosen S       | Eur J Gastroenterol              | 2022             | Disease Analysis |
| 10.3390/vaccines10030000       | Factors Associated with       | S. H. Loosen; M. E. Loosen          | Loosen S       | Vaccines (Basel)                 | 2022             | Disease Analysis |
| 10.1007/s15010-022-0000-0      | Obesity and liver             | S. H. Loosen; M. E. Loosen          | Loosen S       | Infection                        | 2022             | Disease Analysis |
| 10.1016/j.ejca.2022.03.001     | An elevated Ferritin          | S. H. Loosen; M. E. Loosen          | Loosen S       | Eur J Cancer                     | 2022             | Disease Analysis |
| 10.1186/s12874-022-0000-0      | Overlap between               | S. H. Loosen; M. E. Loosen          | Loosen S       | BMC Gastroenterol                | 2022             | Disease Analysis |
| 10.1038/s41551-022-0000-0      | The spectrum of               | S. H. Loosen; M. E. Loosen          | Loosen S       | Sci Rep                          | 2022             | Disease Analysis |
| 10.3390/cancers14030000        | Overweight and                | S. H. Loosen; M. E. Loosen          | Loosen S       | Cancers (Basel)                  | 2022             | Disease Analysis |
| 10.5414/cpp4-10-0000           | Relation of the               | J. Mathes; K. Köhler                | Mathes J       | Int J Clin Pharm                 | 2010             | Disease Analysis |
| 10.1024/0301-1563/a00000       | Varicose veins                | U. Müller-Bühl; M. E. Müller-Bühl   | Müller-Bühl U  | Vasa                             | 2012             | CONTENT          |
| 10.1055/s-003-12345            | Prävalenz, lokale             | U. Müller-Bühl; M. E. Müller-Bühl   | Müller-Bühl U  | Phlebologie                      | 2012             | CONTENT          |
| 10.1111/j.1744-0064.2013.00000 | Expenditure of                | U. Müller-Bühl; M. E. Müller-Bühl   | Müller-Bühl U  | International Journal of         | 2013             | CONTENT          |
| 10.1007/s12332-016-0000-0      | Comorbidity between           | F. Nyberg; L. H. Nyberg             | Nyberg F       | Adv Ther                         | 2016             | Disease Analysis |

|    |                |                 |                  |               |                 |                    |
|----|----------------|-----------------|------------------|---------------|-----------------|--------------------|
| 1  |                |                 |                  |               |                 |                    |
| 2  | 10.1016/j.zefc | Estimating th   | C. Ohlmeier; F   | Ohlmeier C    | Z Evid Fortbild | 2018 Disease Analy |
| 3  | 10.1080/0001   | Current health  | J. J.-H. Park; C | Park JJH      | Acta Oto-Lary   | 2018 Disease Analy |
| 4  | 10.1016/j.pcd  | Amputation r    | S. Pscherer; F   | Pscherer S    | Primary Care    | 2012 Disease Analy |
| 5  | 10.1016/j.jdia | Fracture risk i | W. Rathmann;     | Rathmann W    | J Diabetes Cor  | 2015 Disease Analy |
| 6  | 10.1111/1753   | Association of  | W. Rathmann;     | Rathmann W    | Journal of Dia  | 2018 Disease Analy |
| 7  | 10.1016/j.psy  | Increased dep   | W. Rathmann;     | Rathmann W    | Psychiatry Res  | 2018 Disease Analy |
| 8  | 10.1007/s001   | Incidence of n  | W. Rathmann;     | Rathmann W    | Diabetologia    | 2022 Disease Analy |
| 9  | 10.3390/canc   | Cancer Patien   | C. Roderburg;    | Roderburg C   | Cancers (Base   | 2021 Disease Analy |
| 10 | 10.1097/meg    | Nonalcoholic f  | C. Roderburg;    | Roderburg C   | Eur J Gastroer  | 2022 Disease Analy |
| 11 | 10.1016/j.jpsy | Diagnosing so   | R. Schaefer; C   | Schaefer R    | Journal of Psy  | 2010 CONTENT       |
| 12 | 10.20524/aog   | Do patients w   | R. Schiffner; K  | Schiffner R   | Ann Gastroen    | 2016 Disease Analy |
| 13 | 10.3390/jcm1   | An Elevated F   | D. Schöler; K    | Schöler D     | J Clin Med      | 2022 Disease Analy |
| 14 | 10.1177/0145   | Incidence of Ir | D. U. Seidel; S  | Seidel DU     | Ear Nose Thro   | 2021 Disease Analy |
| 15 | 10.1007/s001   | Incidence of fr | U. Stumpf; P     | Stumpf U      | Osteoporosis    | 2020 Disease Analy |
| 16 | 10.1007/s004   | Increased risk  | C. Tanislav; C   | Tanislav C    | J Cancer Res C  | 2019 Disease Analy |
| 17 | 10.1159/0005   | Late Detectio   | C. Tanislav; K   | Tanislav C    | European Neu    | 2019 Disease Analy |
| 18 | 10.1007/s001   | Factors associ  | C. Tanislav; K   | Tanislav C    | Osteoporosis    | 2020 Disease Analy |
| 19 | 10.1016/j.puh  | Investigation   | C. Tanislav; K   | Tanislav C    | Public Health   | 2022 Disease Analy |
| 20 | 10.1016/j.jad  | Association be  | F. Teichgräber   | Teichgräber F | J Affect Disor  | 2021 Disease Analy |
| 21 | 10.1016/j.pcd  | Prevalence of   | L. van den Bo    | van den Boom  | Prim Care Dia   | 2021 Disease Analy |
| 22 | 10.1177/1932   | Multimorbidi    | L. van den Bo    | van den Boom  | J Diabetes Sci  | 2022 Disease Analy |
| 23 | 10.5414/cp20   | Antihypertens   | G. Wagner; A     | Wagner G      | Int. Journal of | 2012 Disease Analy |
| 24 | 10.5414/cp20   | Impact of com   | A. Werner-Bus    | Werner-Busse  | Int. Journal of | 2014 Disease Analy |
| 25 | 10.1111/ddg    | Prevalence an   | M. Worm; H       | Worm M        | JDDG: Journal   | 2013 Disease Analy |
| 26 | 10.3109/0951   | Prevalence of   | V. Ziller; P. Ha | Ziller V      | Gynecol Endoc   | 2013 Disease Analy |
| 27 | 10.1007/s004   | Time to pregn   | V. Ziller; C. He | Ziller V      | Arch Gynecol    | 2015 Disease Analy |
| 28 |                |                 |                  |               |                 |                    |
| 29 |                |                 |                  |               |                 |                    |
| 30 |                |                 |                  |               |                 |                    |
| 31 |                |                 |                  |               |                 |                    |
| 32 |                |                 |                  |               |                 |                    |
| 33 |                |                 |                  |               |                 |                    |
| 34 |                |                 |                  |               |                 |                    |
| 35 |                |                 |                  |               |                 |                    |
| 36 |                |                 |                  |               |                 |                    |
| 37 |                |                 |                  |               |                 |                    |
| 38 |                |                 |                  |               |                 |                    |
| 39 |                |                 |                  |               |                 |                    |
| 40 |                |                 |                  |               |                 |                    |
| 41 |                |                 |                  |               |                 |                    |
| 42 |                |                 |                  |               |                 |                    |
| 43 |                |                 |                  |               |                 |                    |
| 44 |                |                 |                  |               |                 |                    |
| 45 |                |                 |                  |               |                 |                    |
| 46 |                |                 |                  |               |                 |                    |
| 47 |                |                 |                  |               |                 |                    |
| 48 |                |                 |                  |               |                 |                    |
| 49 |                |                 |                  |               |                 |                    |
| 50 |                |                 |                  |               |                 |                    |
| 51 |                |                 |                  |               |                 |                    |
| 52 |                |                 |                  |               |                 |                    |
| 53 |                |                 |                  |               |                 |                    |
| 54 |                |                 |                  |               |                 |                    |
| 55 |                |                 |                  |               |                 |                    |
| 56 |                |                 |                  |               |                 |                    |
| 57 |                |                 |                  |               |                 |                    |
| 58 |                |                 |                  |               |                 |                    |
| 59 |                |                 |                  |               |                 |                    |
| 60 |                |                 |                  |               |                 |                    |

| type of resear | subject area  | sample of pub  | ICD-10 catego                 | main medicati  | study design   | control group |
|----------------|---------------|----------------|-------------------------------|----------------|----------------|---------------|
| Applied studie | General epide | Incidence and  | Diseases of thi               | -              | Cohort         | no            |
| Applied studie | General epide | Incidence and  | Mental and be                 | Anti-Dementia  | Case-Control   | yes           |
| Applied studie | General epide | Incidence and  | Mental and be                 | -              | Cohort         | no            |
| Applied studie | General epide | Diagnosis Stud | Mental and be                 | -              | Case-Control   | yes           |
| Applied studie | General epide | Risk & Comore  | Mental and be                 | -              | Case-Control   | yes           |
| Applied studie | General epide | Treatment-rel  | Multiple Disea                | -              | Cross-sectiona | no            |
| Applied studie | General epide | Risk & Comore  | Diseases of thi               | -              | cohort         | yes           |
| Applied studie | General epide | Risk & Comore  | Diseases of thi               | -              | cohort         | yes           |
| Applied studie | General epide | Risk & Comore  | Mental and be                 | -              | Case-Control   | yes           |
| Applied studie | General epide | Incidence and  | Mental and be                 | -              | Case-Control   | yes           |
| Applied studie | General epide | Incidence and  | Diseases of thi               | -              | Cross-sectiona | no            |
| Applied studie | General epide | Risk & Comore  | Neoplasms                     | -              | Case-Control   | yes           |
| Applied studie | General epide | Incidence and  | Neoplasms                     | -              | Cohort         | no            |
| Applied studie | General epide | Incidence and  | Diseases of thi               | -              | Case-Control   | yes           |
| Applied studie | General epide | Risk & Comore  | Pregnancy, ch                 | -              | Case-Control   | yes           |
| Applied studie | General epide | Obstetrics and | Neoplasms                     | -              | Retrospective  | no            |
| Applied studie | General epide | Risk & Comore  | Mental and be                 | Adh Medicatio  | Cross-sectiona | no            |
| Applied studie | General epide | Risk & Comore  | Diseases of thi               | -              | cohort         | yes           |
| Applied studie | General epide | Risk & Comore  | Diseases of the respiratory s | -              | cross-sectiona | no            |
| Applied studie | General epide | Incidence and  | Diseases of thi               | -              | Case-Control   | yes           |
| Applied studie | General epide | Incidence and  | Mental and be                 | -              | Case-Control   | yes           |
| Applied studie | General epide | Incidence and  | Mental and be                 | -              | Case-Control   | yes           |
| Applied studie | General epide | Incidence and  | Endocrine, nu                 | -              | Cohort         | no            |
| Applied studie | General epide | Incidence and  | Endocrine, nu                 | -              | Cohort         | no            |
| Applied studie | General epide | Incidence and  | Endocrine, nu                 | -              | Cohort         | yes           |
| Applied studie | General epide | Incidence and  | Endocrine, nu                 | Statin Therapy | Cross-sectiona | no            |
| Applied studie | General epide | Treatment-rel  | Multiple Disea                | -              | Cross-sectiona | no            |
| Applied studie | General epide | Incidence and  | Mental and be                 | -              | Cross-sectiona | no            |
| Applied studie | General epide | Risk & Comore  | Diseases of thi               | -              | cohort         | no            |
| Applied studie | General epide | Incidence and  | Mental and be                 | Antidepressan  | Cohort         | no            |
| Applied studie | General epide | Incidence and  | Diseases of thi               | -              | Case-Control   | yes           |
| Applied studie | General epide | Incidence and  | Mental and be                 | -              | cohort         | yes           |
| Applied studie | General epide | Risk & Comore  | Diseases of thi               | -              | cohort         | yes           |
| Applied studie | General epide | Incidence and  | Diseases of thi               | -              | Cross-sectiona | no            |
| Applied studie | General epide | Incidence and  | Diseases of thi               | -              | cohort         | no            |
| Applied studie | General epide | Risk & Comore  | Neoplasms                     | -              | cohort         | yes           |
| Applied studie | General epide | Risk & Comore  | Neoplasms                     | -              | Case-Control   | yes           |
| Applied studie | General epide | Risk & Comore  | Diseases of thi               | -              | cohort         | yes           |
| Applied studie | General epide | Risk & Comore  | Diseases of thi               | -              | Case-Control   | yes           |
| Applied studie | General epide | Risk & Comore  | Diseases of thi               | -              | cohort         | yes           |
| Applied studie | General epide | Epidemiology   | External cause                | Sars-Cov-2 Vac | cohort         | no            |
| Applied studie | General epide | Risk & Comore  | Diseases of thi               | -              | Cross-sectiona | no            |
| Applied studie | General epide | Risk & Comore  | Neoplasms                     | -              | cohort         | yes           |
| Applied studie | General epide | Risk & Comore  | Diseases of thi               | -              | cohort         | no            |
| Applied studie | General epide | Risk & Comore  | Diseases of thi               | -              | Cross-sectiona | yes           |
| Applied studie | General epide | Risk & Comore  | Neoplasms                     | -              | cohort         | no            |
| Applied studie | General epide | Risk & Comore  | Diseases of thi               | Different Anti | Cohort         | no            |
| Applied studie | General epide | Risk & Comore  | Diseases of thi               | -              | Cohort         | yes           |
| Applied studie | General epide | Incidence and  | Diseases of thi               | -              | Cross-sectiona | no            |
| Applied studie | General epide | Incidence and  | Diseases of thi               | -              | Cross-sectiona | yes           |
| Applied studie | General epide | Incidence and  | Diseases of thi               | -              | cohort         | no            |

1  
2  
3  
4  
5  
6  
7  
8  
9  
10  
11  
12  
13  
14  
15  
16  
17  
18  
19  
20  
21  
22  
23  
24  
25  
26  
27  
28  
29  
30  
31  
32  
33  
34  
35  
36  
37  
38  
39  
40  
41  
42  
43  
44  
45  
46  
47  
48  
49  
50  
51  
52  
53  
54  
55  
56  
57  
58  
59  
60

|                |               |                |                |               |                |     |
|----------------|---------------|----------------|----------------|---------------|----------------|-----|
| Applied studie | General epide | Incidence and  | Diseases of th | -             | methodologic   | no  |
| Applied studie | General epide | Incidence and  | Diseases of th | -             | Cross-sectiona | no  |
| Applied studie | General epide | Risk & Comor   | Endocrine, nu  | -             | Cohort         | no  |
| Applied studie | General epide | Risk & Comor   | Endocrine, nu  | -             | Case-Control   | yes |
| Applied studie | General epide | Risk & Comor   | Mental and be  | -             | Cross-sectiona | no  |
| Applied studie | General epide | Incidence and  | Endocrine, nu  | -             | Cross-sectiona | no  |
| Applied studie | General epide | Incidence and  | Endocrine, nu  | -             | cohort         | yes |
| Applied studie | General epide | Incidence and  | Mental and be  | -             | cohort         | yes |
| Applied studie | General epide | Incidence and  | Diseases of th | -             | cohort         | yes |
| Applied studie | General epide | Incidence and  | Mental and be  | -             | Cross-sectiona | yes |
| Applied studie | General epide | Risk & Comor   | Endocrine, nu  | -             | Case-Control   | yes |
| Applied studie | General epide | Incidence and  | Mental and be  | -             | cohort         | yes |
| Applied studie | General epide | Incidence and  | Diseases of th | -             | Retrospective  | no  |
| Applied studie | General epide | Incidence and  | Endocrine, nu  | -             | Case-Control   | yes |
| Applied studie | General epide | Risk & Comor   | Neoplasms      | -             | Case-Control   | yes |
| Applied studie | General epide | Incidence and  | Diseases of th | -             | Case-Control   | yes |
| Applied studie | General epide | Incidence and  | Injury, poison | -             | Cohort         | yes |
| Applied studie | General epide | Incidence and  | Diseases of th | -             | Cross-sectiona | no  |
| Applied studie | General epide | Risk & Comor   | Mental and be  | -             | Case-Control   | yes |
| Applied studie | General epide | Incidence and  | Endocrine, nu  | -             | cohort         | yes |
| Applied studie | General epide | Incidence and  | Endocrine, nu  | -             | Cross-sectiona | no  |
| Applied studie | General epide | Risk & Comor   | Mental and be  | Antihypertens | Case-Control   | yes |
| Applied studie | General epide | Risk & Comor   | Diseases of th | -             | Cross-sectiona | no  |
| Applied studie | General epide | Incidence and  | Diseases of th | -             | Cross-sectiona | no  |
| Applied studie | General epide | Incidence and  | Diseases of th | -             | Cross-sectiona | yes |
| Applied studie | General epide | Obstetrics and | Endocrine, nu  | -             | cohort         | no  |

| other DB | inclu   | industry fundi | practices total | non-GP | inclu          | no. months of follow-Up |
|----------|---------|----------------|-----------------|--------|----------------|-------------------------|
| yes      | yes     |                | 400             | yes    |                | 6                       |
| no       | no      |                | 203             | yes    |                | 84                      |
| no       | no      |                | 485             | yes    |                | 132                     |
| no       | no      |                | 957             | yes    |                | 24                      |
| no       | no      | unknown        |                 | no     |                | 60                      |
| no       | unknown |                | 800             | yes    |                | 109                     |
| no       | no      |                | 1274            | no     |                | 168                     |
| no       | no      |                | 1274            | no     |                | 168                     |
| no       | no      |                | 256             | yes    |                | 12                      |
| no       | no      |                | 1072            | no     |                | 109                     |
| no       | no      |                | 136             | yes    |                | 120                     |
| no       | no      | unknown        |                 | no     |                | 60                      |
| no       | unknown |                | 1202            | no     |                | 60                      |
| no       | no      | unknown        |                 | no     |                | 25                      |
| no       | no      |                | 281             | yes    |                | 60                      |
| no       | unknown |                | 102             | yes    | not applicable | no                      |
| yes      | no      | unknown        |                 | yes    |                | 12                      |
| no       | no      |                | 1262            | no     |                | 192                     |
| no       | no      | unknown        |                 | yes    | unknown        | yes                     |
| no       | no      | unknown        |                 | no     |                | 120                     |
| no       | no      | unknown        |                 | no     |                | 108                     |
| no       | no      | unknown        |                 | no     |                | 120                     |
| no       | yes     |                | 1072            | no     |                | 12                      |
| yes      | yes     | unknown        |                 | no     |                | 60                      |
| no       | yes     | unknown        |                 | no     |                | 103                     |
| no       | unknown |                | 1262            | no     |                | 12                      |
| no       | unknown | unknown        |                 | no     |                | 12                      |
| no       | no      |                | 168             | yes    |                | 21                      |
| no       | no      |                | 1182            | no     |                | 108                     |
| no       | no      | unknown        |                 | no     |                | 27                      |
| no       | no      |                | 1262            | no     |                | 192                     |
| no       | yes     |                | 1262            | no     |                | 192                     |
| no       | yes     |                | 1034            | yes    |                | 168                     |
| yes      | yes     |                | 4690            | no     |                | 72                      |
| no       | no      |                | 787             | yes    |                | 84                      |
| no       | no      |                | 1284            | yes    |                | 240                     |
| no       | no      |                | 1274            | yes    |                | 180                     |
| no       | no      |                | 1193            | no     |                | 168                     |
| no       | yes     | unknown        |                 | no     |                | 192                     |
| no       | no      |                | 924             | no     |                | 180                     |
| no       | no      |                | 827             | no     |                | 6                       |
| no       | no      |                | 1056            | no     |                | 13                      |
| no       | no      |                | 924             | no     |                | 180                     |
| no       | no      |                | 1240            | no     |                | 108                     |
| no       | no      |                | 1274            | no     |                | 180                     |
| no       | no      |                | 832             | no     |                | 120                     |
| no       | unknown | unknown        |                 | no     | unknown        | yes                     |
| no       | unknown |                | 0               | no     |                | 37                      |
| no       | unknown |                | 32              | no     |                | 36                      |
| no       | no      |                | 0               | no     |                | 36                      |
| yes      | yes     | unknown        |                 | yes    | not applicable | yes                     |

|    |     |         |         |     |         |         |
|----|-----|---------|---------|-----|---------|---------|
| 1  |     |         |         |     |         |         |
| 2  | yes | yes     | unknown | no  | unknown | unknown |
| 3  | no  | no      | unknown | yes | 12      | no      |
| 4  | no  | no      | unknown | no  | 60      | yes     |
| 5  | no  | no      | 1072    | yes | 168     | yes     |
| 6  | yes | yes     | 108     | yes | 22      | unknown |
| 7  | no  | no      | 939     | yes | 36      | unknown |
| 8  | no  | no      | 1171    | yes | 11      | yes     |
| 9  | no  | no      | 1274    | no  | 228     | yes     |
| 10 | no  | no      | 1262    | no  | 192     | unknown |
| 11 | no  | no      | 22      | no  | 7       | unknown |
| 12 | no  | no      | unknown | yes | unknown | unknown |
| 13 | no  | no      | 924     | no  | 180     | yes     |
| 14 | no  | no      | unknown | yes | 216     | yes     |
| 15 | no  | no      | unknown | no  | 192     | yes     |
| 16 | no  | no      | 1262    | no  | 120     | yes     |
| 17 | no  | no      | unknown | no  | 84      | yes     |
| 18 | no  | no      | unknown | no  | 193     | unknown |
| 19 | no  | no      | 1186    | yes | 24      | unknown |
| 20 | no  | no      | 185     | yes | 36      | unknown |
| 21 | no  | no      | 268     | yes | 60      | yes     |
| 22 | no  | no      | 958     | yes | 60      | unknown |
| 23 | no  | unknown | 575     | yes | 60      | unknown |
| 24 | no  | unknown | 1631    | yes | unknown | unknown |
| 25 | no  | no      | 1472    | yes | 12      | unknown |
| 26 | no  | no      | 158     | yes | 60      | unknown |
| 27 | no  | no      | 433     | yes | 144     | unknown |
| 28 |     |         |         |     |         |         |
| 29 |     |         |         |     |         |         |
| 30 |     |         |         |     |         |         |
| 31 |     |         |         |     |         |         |
| 32 |     |         |         |     |         |         |
| 33 |     |         |         |     |         |         |
| 34 |     |         |         |     |         |         |
| 35 |     |         |         |     |         |         |
| 36 |     |         |         |     |         |         |
| 37 |     |         |         |     |         |         |
| 38 |     |         |         |     |         |         |
| 39 |     |         |         |     |         |         |
| 40 |     |         |         |     |         |         |
| 41 |     |         |         |     |         |         |
| 42 |     |         |         |     |         |         |
| 43 |     |         |         |     |         |         |
| 44 |     |         |         |     |         |         |
| 45 |     |         |         |     |         |         |
| 46 |     |         |         |     |         |         |
| 47 |     |         |         |     |         |         |
| 48 |     |         |         |     |         |         |
| 49 |     |         |         |     |         |         |
| 50 |     |         |         |     |         |         |
| 51 |     |         |         |     |         |         |
| 52 |     |         |         |     |         |         |
| 53 |     |         |         |     |         |         |
| 54 |     |         |         |     |         |         |
| 55 |     |         |         |     |         |         |
| 56 |     |         |         |     |         |         |
| 57 |     |         |         |     |         |         |
| 58 |     |         |         |     |         |         |
| 59 |     |         |         |     |         |         |
| 60 |     |         |         |     |         |         |

# BMJ Open

## German primary care data collection projects: a scoping review

|                                 |                                                                                                                                                                                                                                                                                                                                                                                                                                                                                                                                                                                                                                                                                                                                                                                                                                                                                                                                                                                                                                                                                     |
|---------------------------------|-------------------------------------------------------------------------------------------------------------------------------------------------------------------------------------------------------------------------------------------------------------------------------------------------------------------------------------------------------------------------------------------------------------------------------------------------------------------------------------------------------------------------------------------------------------------------------------------------------------------------------------------------------------------------------------------------------------------------------------------------------------------------------------------------------------------------------------------------------------------------------------------------------------------------------------------------------------------------------------------------------------------------------------------------------------------------------------|
| Journal:                        | <i>BMJ Open</i>                                                                                                                                                                                                                                                                                                                                                                                                                                                                                                                                                                                                                                                                                                                                                                                                                                                                                                                                                                                                                                                                     |
| Manuscript ID                   | bmjopen-2023-074566.R1                                                                                                                                                                                                                                                                                                                                                                                                                                                                                                                                                                                                                                                                                                                                                                                                                                                                                                                                                                                                                                                              |
| Article Type:                   | Original research                                                                                                                                                                                                                                                                                                                                                                                                                                                                                                                                                                                                                                                                                                                                                                                                                                                                                                                                                                                                                                                                   |
| Date Submitted by the Author:   | 08-Nov-2023                                                                                                                                                                                                                                                                                                                                                                                                                                                                                                                                                                                                                                                                                                                                                                                                                                                                                                                                                                                                                                                                         |
| Complete List of Authors:       | Moser, Konstantin; Martin Luther University Halle Wittenberg, Institute of General Practice & Family Medicine; Martin Luther University Halle Wittenberg, Institute of Medical Epidemiology, Biometrics, and Informatics<br>Massag, Janka; Martin Luther University Halle Wittenberg, Institute of Medical Epidemiology, Biometrics, and Informatics<br>Frese, T; Martin Luther University Halle Wittenberg, Institute of General Practice & Family Medicine of the Medical Faculty<br>Mikolajczyk, Rafael; Martin Luther University Halle Wittenberg, Institute for Medical Epidemiology, Biometrics and Informatics<br>Christoph, Jan; Martin Luther University Halle Wittenberg, Junior Research Group (Bio-)Medical Data Science<br>Pushpa, Joshi; Martin Luther University Halle Wittenberg, Institute of General Practice & Family Medicine<br>Straube, Johanna; Martin Luther University Halle Wittenberg, Institute of General Practice & Family Medicine<br>Unverzagt, Susanne; Martin Luther University Halle Wittenberg, Institute of General Practice & Family Medicine |
| <b>Primary Subject Heading</b>: | Health services research                                                                                                                                                                                                                                                                                                                                                                                                                                                                                                                                                                                                                                                                                                                                                                                                                                                                                                                                                                                                                                                            |
| Secondary Subject Heading:      | Health services research, General practice / Family practice, Epidemiology, Health informatics                                                                                                                                                                                                                                                                                                                                                                                                                                                                                                                                                                                                                                                                                                                                                                                                                                                                                                                                                                                      |
| Keywords:                       | Primary Care < Primary Health Care, GENERAL MEDICINE (see Internal Medicine), Health informatics < BIOTECHNOLOGY & BIOINFORMATICS                                                                                                                                                                                                                                                                                                                                                                                                                                                                                                                                                                                                                                                                                                                                                                                                                                                                                                                                                   |
|                                 |                                                                                                                                                                                                                                                                                                                                                                                                                                                                                                                                                                                                                                                                                                                                                                                                                                                                                                                                                                                                                                                                                     |

SCHOLARONE™  
Manuscripts





I, the Submitting Author has the right to grant and does grant on behalf of all authors of the Work (as defined in the below author licence), an exclusive licence and/or a non-exclusive licence for contributions from authors who are: i) UK Crown employees; ii) where BMJ has agreed a CC-BY licence shall apply, and/or iii) in accordance with the terms applicable for US Federal Government officers or employees acting as part of their official duties; on a worldwide, perpetual, irrevocable, royalty-free basis to BMJ Publishing Group Ltd ("BMJ") its licensees and where the relevant Journal is co-owned by BMJ to the co-owners of the Journal, to publish the Work in this journal and any other BMJ products and to exploit all rights, as set out in our [licence](#).

The Submitting Author accepts and understands that any supply made under these terms is made by BMJ to the Submitting Author unless you are acting as an employee on behalf of your employer or a postgraduate student of an affiliated institution which is paying any applicable article publishing charge ("APC") for Open Access articles. Where the Submitting Author wishes to make the Work available on an Open Access basis (and intends to pay the relevant APC), the terms of reuse of such Open Access shall be governed by a Creative Commons licence – details of these licences and which [Creative Commons](#) licence will apply to this Work are set out in our licence referred to above.

Other than as permitted in any relevant BMJ Author's Self Archiving Policies, I confirm this Work has not been accepted for publication elsewhere, is not being considered for publication elsewhere and does not duplicate material already published. I confirm all authors consent to publication of this Work and authorise the granting of this licence.

# 1 German primary care data collection projects: a 2 scoping review

3 Konstantin Moser<sup>1,2</sup>, Janka Massag<sup>2</sup>, Thomas Frese<sup>1</sup>, Rafael Mikolajczyk<sup>2</sup>, Jan Christoph<sup>3</sup>, Joshi Pushpa<sup>1</sup>,  
4 Johanna Straube<sup>1</sup>, Susanne Unverzagt<sup>1</sup>

5 <sup>1</sup>Institute of General Practice & Family Medicine, Martin Luther University Halle-Wittenberg, Halle (Saale), Germany

6 <sup>2</sup>Institute of Medical Epidemiology, Biometrics, and Informatics, Martin Luther University Halle-Wittenberg, Halle (Saale),  
7 Germany

8 <sup>3</sup>Junior Research Group (Bio-)Medical Data Science, Martin Luther University Halle-Wittenberg, Halle (Saale), Germany

## 9 10 **Corresponding author:**

11 Konstantin Moser (M. Sc.)

12 Institute of General Practice & Family Medicine

13 Magdeburger Str. 8

14 06112, Halle (Saale)

15 Germany

16 konstantin\_moser@web.de

## 17 Abstract

18 **Background:** The widespread use of electronic health records (EHRs) has led to a growing number  
19 of large routine primary care data collection projects globally, making these records a valuable  
20 resource for health services and epidemiological and clinical research. This scoping review aims to  
21 comprehensively assess and compare strengths and limitations of all German primary care data  
22 collection projects and relevant research publications that extract data directly from practice  
23 management systems.

25 **Methods:** A literature search was conducted in the electronic databases in May 2021 and in June  
26 2022. The search string included terms related to general practice, routine data, and Germany. The  
27 retrieved studies were classified as applied studies and methodological studies, and categorized by  
28 type of research, subject area, sample of publications, disease category, or main medication analyzed.

30 **Results:** A total of 962 references were identified, with 241 studies included from six German EHR  
31 database projects. The projects exhibited significant heterogeneity in terms of size, data collection  
32 methods, and variables collected. The majority of the applied studies (n = 205, 85%) originated from  
33 one database with a primary focus on pharmacoepidemiologic topics (n = 127, 52%) including  
34 prescription patterns (n = 68, 28%) and studies about treatment outcomes, compliance, and treatment  
35 effectiveness (n = 34, 14%). Epidemiologic studies (n = 77, 32%) mainly focused on incidence and  
36 prevalence studies (n = 41, 17%) and risk and comorbidity analysis studies (n = 31, 12%). Only 10% (n  
37 = 23) of studies were in the field of health services research, such as hospitalization.

39 **Conclusion:** The development and durability of primary care data collection projects in Germany is  
40 hindered by insufficient public funding, technical issues of data extraction, and strict data protection  
41 regulations. There is a need for further research and collaboration to improve the usability of EHRs for  
42 health services and research.

45 **Keywords:** Data collection; Electronic health records; Primary care; Database projects; Routine data;  
46 Scoping review.

48 **Count:** 3747 words

## 49 Introduction

50 Electronic health records (EHRs) serve as a comprehensive record of a patient's health information,  
51 capturing crucial details from each medical visit (1). While originally created for clinical purposes, EHRs  
52 are now widely utilized in epidemiological and clinical research, as well as for improving healthcare  
53 services (2, 3). Currently, about 36 large routine primary care data collection projects exist globally, in  
54 which EHRs are directly collected from practice management systems (PMS). These projects, which  
55 allow millions of patients to anonymously contribute data for health sciences, are mainly carried out  
56 in English-speaking (United Kingdom, USA, and Canada) and European countries. The success and  
57 longevity of these projects is influenced by factors such as strong academic and governmental support  
58 as well as the use of comprehensive technical facilities for data extraction and analysis (4).

59 In Germany, the analysis of EHRs in primary care is largely based on health insurance data rather than  
60 primary care data collection projects (5). However, health insurance data is primarily recorded for  
61 accounting purposes and lacks valuable information such as clinical input data, reasons for encounters,  
62 or diagnostic procedures (6). Additionally, privately insured patients, which account for approximately  
63 13% of the German population, are often not included in such health insurance databases, potentially  
64 leading to selection bias (7).

65 Primary care in Germany is predominantly delivered by general practitioners (GPs) but may also  
66 encompass any outpatient physician accessible without a referral, irrespective of their specialty (8).  
67 Between 2002-2010, the Federal Ministry of Education and Research (Bundesministerium für Bildung  
68 und Forschung [BMBF]) recognized the importance of family medicine in the improvement of  
69 healthcare services and research (9). During this time, the ministry also funded two primary care data  
70 collection projects, MedVip (Medizinische Versorgung in Praxen) and CONTENT (CONTinuous  
71 morbidity registration Epidemiologic NeTwork) (10). However, these projects ended due to limited  
72 funding and technical challenges, and a standardized interface for extracting EHRs is still lacking, even  
73 though there are over 132 different PMS available on the German market (11-13). Despite these  
74 challenges, the use of EHRs in outpatient care continues to grow due to the vast amount of data  
75 available. In 2020, for example, approximately 688 million outpatient cases were treated by 161,400  
76 outpatient physicians in Germany, representing a "real world data treasure" (14).

77 EHRs have evolved from their initial purpose of billing to becoming a valuable tool for epidemiologic  
78 and clinical research (2, 3). The increasing functionality and quality of EHRs have made them an  
79 affordable and accessible data source (15). In clinical research, for example, EHRs can facilitate patient  
80 identification and recruitment, assess study feasibility, and streamline data collection at baseline and  
81 follow-up (15-17).

82 The aim of this scoping review is to identify and describe all primary care data collection projects and  
83 research publications in Germany dedicated to extracting data from PMS. This might facilitate further  
84 research by describing the methodologic problems, amplifying possible solutions, and proposing the  
85 potential of the projects to inform health policy and practice. To this end, we chose to conduct a  
86 scoping review, since our goal is to identify and map study characteristics and not to answer a clinically  
87 meaningful question (18).

## 88 Methods

### 89 Search strategy

90 This scoping review follows the Preferred Reporting Items for Systematic Reviews and Meta-Analyses  
91 extension for Scoping Reviews (PRISMA-ScR) checklist (19). In order to identify studies relevant for our  
92 research question, we explored two electronic databases, Medline (via OVID) and LIVIVO, the latter of  
93 which is a German database for life sciences. The search was conducted in May 2021 and updated in  
94 June 2022, searching for all records until this time point without any time restrictions. The search string  
95 combined the terms "general practice" with synonyms like "family physician" as well as "routine data".  
96 Other terms such as "electronic health record" or "Germany" were included to cover all relevant  
97 aspects of our research questions. For each keyword, relevant Medical Subject Headings (MeSH) terms  
98 were identified for the Medline exploration. The LIVIVO search was conducted in German with the  
99 equivalent terms. When relevant projects were identified, the project names were added to the search  
100 string to find further publications. In addition, we searched the project websites and contacted the  
101 project's principal investigators (PIs) using a comprehensive checklist that included a list of  
102 publications retrieved by the search to identify any missing project information that was not publicly  
103 available. With encouragement from the PI of the IQVIA™ Disease Analyzer, we also conducted a  
104 search on PubMed (National Library of Medicine [NLM]) using the keywords "Disease Analyzer" and  
105 "Germany" to gather all relevant publications from this database, since a considerable number of  
106 publications were identified through the PubMed search which were not previously found through the  
107 Ovid Medline search. The complete search strategy can be found in the supplement (Table S1).

### 108 Inclusion/Exclusion Criteria

109 Abstract, title, and subsequently full-texts were reviewed independently by three researchers (KM, JM,  
110 and JS) and checked for eligibility. All disagreements were resolved through consensus. If no consensus  
111 was reached, a fourth researcher was consulted (SU). We used two online tools for systematic reviews  
112 for the screening process. Rayyan (<https://www.rayyan.ai/>) was used for title and abstract screening  
113 and Covidence (<https://www.covidence.org/>) was used for full-text screening. Both tools allow for  
114 each reviewer to decide if the text should be included, excluded or if it is undecided and to add a reason  
115 for this decision. Decisions are blinded until both reviewers are done with the screening. After both  
116 reviewers can see if they agree or disagree on the inclusion of a text.

117 Studies were eligible if they met the following inclusion criteria: 1) the study population consisted of  
118 patients who received treatment from primary care physicians but could also include patients who  
119 received care from other specialists who were not considered primary care physicians; 2) use of EHR  
120 data that was initially entered into the PMS independently of primary or secondary data use; 3) data  
121 was extracted from PMS and transferred to an EHR database; 4) studies utilizing data collected as part  
122 of routine clinical practice; and 5) full-text publications in English or German language. The following  
123 were excluded: 1) health research studies using primary data, health insurance data, and data from  
124 disease registries; 2) conference contributions and publications in languages other than English or  
125 German; and 3) studies collecting supplementary data beyond usual care.

### 126 Data management

127 The identified references were downloaded into the reference manager EndNote Version X7.8 where  
128 potential duplicates were identified with the respective tool. Duplicates that were not identified by  
129 the automated tool due to different spelling were removed manually during the review process.

## 130 Data extraction

131 Information from the retrieved publications was extracted by KM, JM, and JS. JM and JS each reviewed  
132 the included publications using a standardized data extraction template created with Microsoft Word.  
133 The data was double checked by KM and entered in Table S4. We extracted information on the  
134 following: German primary care data collection projects including general information, data collection  
135 methods, data evaluation, and recruitment strategies, and classified studies as applied studies and  
136 methodological studies and categorized type of research into subject area, sample of publications,  
137 disease category, or main medication analyzed.

## 138 Patient and Public Involvement

139 None

## 140 Results

141 We identified 962 references, screened a 291 of those as potentially eligible studies, and included 241  
142 studies conducted with data from six German EHR database projects (see Figure 1).

143 **Figure 1: PRISMA 2020 flow diagram for new systematic reviews which included searches of**  
144 **databases only**

## 145 Database characteristics

146 Four out of six primary health care data collection projects are currently active and two have been  
147 completed (Table 1). This overview is sorted by the year in which data collection began.

148 Of the six, the IQVIA™ Disease Analyser (DA) is the only German project out of the six identified by this  
149 review that is exclusively funded by the pharmaceutical sector. It is specialized in  
150 pharmacoepidemiologic research and is used as an information system for federal health monitoring  
151 (20). Currently, it includes patient records from around 2815 practices, mostly general practices but  
152 also including other specialties like cardiology, dermatology, and pediatrics, which are not linked across  
153 practices (21). With approximately 34 million cases included, it is the largest German primary data  
154 collection database and considered to be nationally representative (22).

155 The other five primary care data collection databases are publicly funded and organized by local  
156 academic research groups. Main financiers are the BMBF and the German Research Foundation (DFG).  
157 The MedVip project aimed to realize first solutions for the use of routine data documentation in the  
158 general practice setting. At its peak, a total of 165 practices with approximately 153,000 patient  
159 datasets were extracted from 21 different PMS providers. The CONTENT project was based on the  
160 International Classification of Primary Care (ICPC) of episodes of care as the primary classification  
161 system (23, 24). Up to 23 practices provided data including approximately 200,000 cases. The project  
162 ended because of very high costs and organizational demand. BeoNet (Beobachtungspraxen-  
163 Netzwerk)-Hannover was integrated within the German Center for Lung Research with an initial focus  
164 on lung diseases and collects data from approximately 16 practices. Currently, the database includes  
165 343.796 cases (25). RADARplus (Routine Anonymised Data for Advanced Health Services Research plus)  
166 aims to develop the infrastructure and technologies, including electronic consent management due to  
167 the German data protection regulations, and collects data from seven practices including 100  
168 pseudonymous cases (21). BeoNet-Halle is the most recent database and includes anonymized as well  
169 as linked pseudonymized datasets from general practices and other types of practices in Germany (26).  
170 The database includes 71,911 anonymized and 471 pseudonymized datasets from five practices in  
171 Saxony-Anhalt region.

1  
2  
3  
4  
5  
6  
7  
8  
9  
10  
11  
12  
13  
14  
15  
16  
17  
18  
19  
20  
21  
22  
23  
24  
25  
26  
27  
28  
29  
30  
31  
32  
33  
34  
35  
36  
37  
38  
39  
40  
41  
42  
43  
44  
45  
46  
47  
48  
49  
50  
51  
52  
53  
54  
55  
56  
57  
58  
59  
60

172 The frequency of data collection by the projects ranges from weekly (BeoNet-Hannover), monthly (DA,  
173 BeoNet-Halle), and quarterly (CONTENT), to time points without a fixed interval (MedVip, RADARplus).  
174 It is crucial to note that in principle the data export interval can be configured to any desired value,  
175 including very short intervals.

For peer review only

176 Table 1: Overview of German primary care data collection projects

|                                                                                                                                                                                                                                                                                                                                                | <b>IQVIA™ Disease Analyzer (DA)</b>                         | <b>MedVip (not active)</b>                       | <b>CONTENT (not active)</b>                                                                 | <b>BeoNet-Hannover</b>                                                                | <b>RADARplus*</b>                                                                                                                       | <b>BeoNet-Halle</b>                                              |
|------------------------------------------------------------------------------------------------------------------------------------------------------------------------------------------------------------------------------------------------------------------------------------------------------------------------------------------------|-------------------------------------------------------------|--------------------------------------------------|---------------------------------------------------------------------------------------------|---------------------------------------------------------------------------------------|-----------------------------------------------------------------------------------------------------------------------------------------|------------------------------------------------------------------|
| Funding sources                                                                                                                                                                                                                                                                                                                                | Private                                                     |                                                  |                                                                                             | Public                                                                                |                                                                                                                                         |                                                                  |
| Homepage                                                                                                                                                                                                                                                                                                                                       | <a href="https://www.iqvia.com/">https://www.iqvia.com/</a> | n.a.                                             | <a href="http://content-info.org/">http://content-info.org/</a>                             | <a href="https://www.mhh.de/forschung/beonet">https://www.mhh.de/forschung/beonet</a> | <a href="https://generalpractice.umg.eu/forschung/projekte/radarplus/">https://generalpractice.umg.eu/forschung/projekte/radarplus/</a> | <a href="http://www.beonet.org">http://www.beonet.org</a>        |
| Research group                                                                                                                                                                                                                                                                                                                                 | IQVIA™ Commercial GmbH & Co. OHG                            | University Medical Center Goettingen             | Department of general practice and health services research, Heidelberg University Hospital | Hannover Medical School and German Center for Lung Research                           | University Medical Center Goettingen                                                                                                    | Medical Faculty of the Martin Luther University Halle-Wittenberg |
| Period of data collection                                                                                                                                                                                                                                                                                                                      | Since 1992                                                  | 2002 to 2010                                     | 2003 to 2014                                                                                | Since 2016                                                                            | Since 2016                                                                                                                              | Since 2020                                                       |
| Included region                                                                                                                                                                                                                                                                                                                                | Whole Germany                                               | Goettingen and Freiburg                          | Baden-Wuerttemberg, Hessen, Lower Saxony and Rhineland-Palatinate                           | Whole Germany                                                                         | Goettingen                                                                                                                              | Whole Germany                                                    |
| Frequency of transferring data from PMS to central data collection site                                                                                                                                                                                                                                                                        | Monthly                                                     | No fixed interval (after a practice appointment) | Quarterly                                                                                   | Weekly                                                                                | No fixed interval (after a practice appointment)                                                                                        | Monthly                                                          |
| Total number of practices (physicians) included (n)                                                                                                                                                                                                                                                                                            | 2815 (3540) (November 2022)                                 | 165 (n.a.) (May 2008)                            | 23 (41) (March 2014)                                                                        | 16 (27) (March 2023)                                                                  | 7 (n.a.) (February 2022)                                                                                                                | 5 (40) (February 2023)                                           |
| Total number of patients (n) per data category                                                                                                                                                                                                                                                                                                 | Anonymized data                                             | 34 million                                       | -                                                                                           | -                                                                                     | -                                                                                                                                       | 71.911                                                           |
|                                                                                                                                                                                                                                                                                                                                                | Pseudonymized data                                          | -                                                | 153,000                                                                                     | 200,000                                                                               | 343.796**                                                                                                                               | 100                                                              |
| The data sources include both published and unpublished sources. *Data provided refers to the completed project RADAR, as data from the ongoing project RADARplus are not yet available. **Marks a disagreement between our analysis and the projects principle investigator. The table indicates the statement of the principle investigator. |                                                             |                                                  |                                                                                             |                                                                                       |                                                                                                                                         |                                                                  |
| n: number; n.a.: not available                                                                                                                                                                                                                                                                                                                 |                                                             |                                                  |                                                                                             |                                                                                       |                                                                                                                                         |                                                                  |



## 178 Data collection methods

179 Anonymized data is exclusively collected by the DA and BeoNet-Halle, whereas all other projects  
180 except for the DA obtain pseudonymized data. In order to collect pseudonymized data, BeoNet-  
181 Hannover, RADARplus and BeoNet-Halle have instituted informed consent procedures (Table 2).  
182 RADARplus and BeoNet-Halle employ an adapted version of the modular Broad Consent, as per the  
183 template provided by the Medical Informatics Initiative (MII), allowing for the transfer of identifiable  
184 data in compliance with data protection regulations (27). Using Broad Consent, patients have the  
185 option to provide consent for various modules, encompassing data collection, processing, scientific  
186 utilization of their patient data, as well as the transfer and scientific use of their health insurance data,  
187 along with the possibility for further contact. BeoNet-Hannover has introduced a study-specific  
188 consent procedure. The projects exhibit significant heterogeneity in their workflows related to data  
189 collection, transfer, and storage, including the integration of trust offices in the cases of RADARplus  
190 and BeoNet-Halle.

191 Three projects (MedVip, BeoNet-Hannover, RADARplus) extract data using a universal interface  
192 (Behandlungsdatentransfer [BDT]). BDT was implemented by the central institute for statutory health  
193 care to support data exchange between different PMS. The MedVip project has shown the feasibility  
194 of data extraction using BDT with various implementations by different software providers. However,  
195 its use requires partly that PMS providers assist on-site in extracting the requested data. Despite  
196 several updates to the BDT interface, it may still cause inadequate data quality when extracting data  
197 from different PMS. Since June 2021, an “archive and exchange interface” is mandatory in PMS which  
198 shall replace BDT. It is based on the interoperability standard HL7 FHIR (Health Level Seven  
199 International Fast Healthcare Interoperability Resources), which has gained widespread adoption in  
200 the healthcare industry and facilitates interoperability.

201 The other projects (DA, CONTENT, BeoNet-Halle) developed their own software solutions to extract  
202 predefined datasets. The CONTENT project developed a tailored data extraction software and a  
203 modular ICPC software. For BeoNet-Halle, specific exporting modules allow anonymized or  
204 pseudonymized data extraction depending on a patient's consent status.

205 Some projects (DA, CONTENT, BeoNet-Hannover, and BeoNet-Halle) provide training on how to use  
206 the software and others provide on-site support to extract data (MedVip and RADARplus). For most  
207 projects, data can be uploaded manually by the physician or the research team. Some projects  
208 (BeoNet-Hannover and BeoNet-Halle) have also implemented automatic upload to a secure network  
209 within the database location. Data validation and integrity checks are run in all projects before data is  
210 uploaded to the database and subsequently to an analysis server that can be assessed by researchers.  
211 This process is generally facilitated by a database administrator.

## 212 Anonymization and Pseudonymization Processes

213 We could not find publications on specific details of the anonymization process by the DA. In the case  
214 of MedVip, a custom Java program in doctors' offices removes identifiable BDT fields, except for the  
215 patient ID, and encrypts BDT files. For CONTENT, the patient's name is replaced with a unique case  
216 number before export. BeoNet Hannover generates automatic pseudonyms from patient IDs for  
217 studies, and data is pseudonymized again before leaving the practice, with data processing managed  
218 by the data manager. RADARplus follows a privacy-by-design approach, manually documenting  
219 consented patients and separating identifiable and medical data. Identifiable data is encrypted and  
220 replaced by a pseudonym provided by a trusted third party. For anonymized data, BeoNet Halle assigns  
221 unique 35-character keys to patients created from the patient ID which changes from export to export.

1  
2  
3 222 For pseudonymized data, it creates temporary pseudonyms for consenting patients sent to a trusted  
4 223 third party for generating permanent pseudonyms, allowing data linkage across multiple sources.  
5  
6  
7  
8  
9  
10  
11  
12  
13  
14  
15  
16  
17  
18  
19  
20  
21  
22  
23  
24  
25  
26  
27  
28  
29  
30  
31  
32  
33  
34  
35  
36  
37  
38  
39  
40  
41  
42  
43  
44  
45  
46  
47  
48  
49  
50  
51  
52  
53  
54  
55  
56  
57  
58  
59  
60

For peer review only

224

Table 2: Data collection methods

|                                                                                                                                                                                                                                                                       |                                | <b>IQVIA™ Disease Analyzer</b>                                                                                                                                      | <b>MedVip (not active)</b>                        | <b>CONTENT (not active)</b>                                                      | <b>BeoNet-Hannover</b>             | <b>RADARplus</b>                                                          | <b>BeoNet-Halle</b>                                      |
|-----------------------------------------------------------------------------------------------------------------------------------------------------------------------------------------------------------------------------------------------------------------------|--------------------------------|---------------------------------------------------------------------------------------------------------------------------------------------------------------------|---------------------------------------------------|----------------------------------------------------------------------------------|------------------------------------|---------------------------------------------------------------------------|----------------------------------------------------------|
| <b>Export types</b>                                                                                                                                                                                                                                                   | Anonymous                      | ✓                                                                                                                                                                   | -                                                 | -                                                                                | -                                  | -                                                                         | ✓                                                        |
|                                                                                                                                                                                                                                                                       | Pseudonymous                   | -                                                                                                                                                                   | ✓                                                 | ✓                                                                                | ✓ *                                | ✓                                                                         | ✓                                                        |
| <b>Export format</b>                                                                                                                                                                                                                                                  |                                | n.a.                                                                                                                                                                | BDT                                               | XML                                                                              | BDT                                | BDT                                                                       | CSV                                                      |
| <b>Medium used to upload into the central database</b>                                                                                                                                                                                                                |                                | n.a.                                                                                                                                                                | Floppy disc or CD send via mail or on-site export | CD, Disc, DVD, email, direct website upload, digital data transfer using GUS box | Internet and secure HTTPS protocol | Via USB into custom software                                              | Internet and secure HTTPS protocol                       |
| <b>Import to Database</b>                                                                                                                                                                                                                                             |                                | n.a.                                                                                                                                                                | Manual                                            | Manual                                                                           | Automatic                          | Manual                                                                    | Automatic or manual                                      |
| <b>Software Details</b>                                                                                                                                                                                                                                               | Interface                      | Not based on BDT interface                                                                                                                                          | Interface for BDT-data export                     | Modular ICPC classification software                                             | Interface for BDT-data export      | Interface for BDT-data export                                             | Universal interface to create a copy of the PMS database |
|                                                                                                                                                                                                                                                                       | Export from different PMSs (n) | 2                                                                                                                                                                   | PMSs with BDT interface                           | 2                                                                                | 2                                  | PMSs with BDT interface                                                   | >70                                                      |
| <b>Databases details</b>                                                                                                                                                                                                                                              | Location                       | Unknown                                                                                                                                                             | Medical Center Goettingen                         | Heidelberg University Clinic hospital                                            | Hannover Medical School Location   | Medical Center Goettingen                                                 | Martin Luther University Halle-Wittenberg                |
|                                                                                                                                                                                                                                                                       | Database                       | n.a.                                                                                                                                                                | MySQL                                             | n.a.                                                                             | Postgre SQL                        | MySQL                                                                     | Postgre SQL                                              |
|                                                                                                                                                                                                                                                                       | Developer                      | n.a.                                                                                                                                                                | Self                                              | Self                                                                             | MUGS Informationsgesellschaft mbH  | Gesellschaft für wissenschaftliche Datenverarbeitung mbH Göttingen (GWDG) | Self                                                     |
|                                                                                                                                                                                                                                                                       | Graphical user interface       | n.a.                                                                                                                                                                | Perl                                              | n.a.                                                                             | PrimeFaces                         | n.a.                                                                      | -                                                        |
|                                                                                                                                                                                                                                                                       | Operating language             | n.a.                                                                                                                                                                | Java                                              | n.a.                                                                             | Java EE6                           | n.a.                                                                      | Python                                                   |
| <b>Linkage to other databases or death records</b>                                                                                                                                                                                                                    |                                | <ul style="list-style-type: none"> <li>No linkage to other IQVIA™ databases</li> <li>Linkage to death records available in a subgroup of patients (~20%)</li> </ul> | -                                                 | -                                                                                | -                                  | -                                                                         | -                                                        |
| <p><b>The data sources include both published and unpublished sources. *Marks a disagreement between our analysis and the projects principle investigator. The table indicates the statement of the principle investigator.</b></p> <p><b>n.a.: not available</b></p> |                                |                                                                                                                                                                     |                                                   |                                                                                  |                                    |                                                                           |                                                          |

## 226 Collected variables and data quality

227 Most projects collect data that is part of health insurance records, encompassing basic patient  
228 demographics, diagnoses, drug prescriptions, and billing codes (Table S2) (28).

229 Lab tests, such as HbA1c, and health utilization variables like referrals or hospitalizations, are  
230 documented by most projects. Additionally, the majority of ongoing projects (DA, MedVip, BeoNet-  
231 Hannover, BeoNet-Halle) capture essential vital signs, including blood pressure, height, weight, and  
232 Body Mass Index (BMI), as well as lifestyle-related factors such as smoking status and allergies (DA,  
233 BeoNet-Hannover, BeoNet-Halle). Regarding sociodemographic variables (e.g., education, income),  
234 number of children, or substance abuse, these variables are not systematically recorded in German  
235 PMS. These variables may be entered into structured or free text fields. To fill this information gap,  
236 some projects use standardized questionnaires (BeoNet-Hannover, BeoNet-Halle) given out to  
237 patients who consented.

238 As for the extraction of free-text data, limited information is available, except for BeoNet-Halle, which  
239 extracts pseudonymized free text. The MedVip project has partially extracted free-text data due to the  
240 absence of data protection regulations during that period.

241 The CONTENT project can be considered the only project that attempted to improve data quality at  
242 the point of data entry. Several quality circles were implemented and proposed solutions were  
243 discussed on a regular basis including training on ICPC-2 coding.

## 244 Recruitment strategies

245 Strategies to recruit GPs and other specialists comprise various financial and non-financial incentives  
246 (Table S3). The DA provides financial incentives of an undisclosed amount, supports practices by using  
247 the exporting software, and provides quarterly feedback reports. Its popularity further seems to  
248 contribute to its recruitment success.

249 Publicly funded projects use only some of these recruitment strategies along their project trajectories.  
250 Snowball recruitment is usually implemented at the start of the project to get it running. There have  
251 been some “cold” acquisition attempts (MedVip, RADARplus) including the distribution of circulars,  
252 but they were associated with low recruitment rates. Some projects use regular or one-time financial  
253 incentives (MedVip, BeoNet-Halle, and CONTENT) while others claim to support practices with  
254 establishing a research infrastructure (BeoNet-Hannover, BeoNet-Halle, and CONTENT). Regular  
255 feedback reports are provided by some projects (DA, MedVip, CONTENT, and BeoNet-Halle). CONTENT  
256 particularly targeted practices with long-term commitment and willingness to code with ICPC. It is also  
257 the only project that developed a protected access area where the patients’ own data could be  
258 accessed. BeoNet-Halle and RADARplus favor practices that integrate consent management.

## 259 Applications of the databases

260 A total of 241 publications were identified (Table S4). Most articles described applied studies (n = 230,  
261 95%) and 5% (n = 11) of the articles described methods (Figure 2). Methodologic studies mainly deal  
262 with project-specific issues, such as project descriptions or data collection issues. 30% (n = 72) of the  
263 studies were industry-funded while only 9% (n = 21) of the publications used data from more than one  
264 database. The mean time of recruitment varied from study to study. However, the overall mean time  
265 of recruitment across all studies was seven years in the DA, 4.75 years in MedVip, and three years in  
266 CONTENT.

267 **Figure 2: Flow diagram of the extracted articles and their arrangement**

268 Of the 241 publications included, 85% (n = 205) were contributed by the DA (*Figure 2 and Table S4*).  
269 52% (n = 127) of the studies deal with pharmacoepidemiologic topics including prescription patterns  
270 (n = 68, 28%) and studies on treatment outcomes, compliance, and treatment effectiveness (n = 34,  
271 14%). Epidemiologic studies (n = 77, 32%) mainly focused on incidence and prevalence (n = 41, 17%)  
272 along with risk and comorbidity analysis (n = 31, 12%). A small proportion included health services  
273 research studies (n = 10, 4%) with topics such as hospitalization.

## 274 Discussion

275 The findings presented in the results section shed light on the landscape of primary care data collection  
276 projects in Germany, where databases are populated with EHRs from PMS. In this discussion, we delve  
277 into the implications of these findings, drawing comparisons with other countries and addressing key  
278 challenges and potential avenues for improvement.

279 One significant challenge identified in Germany is the data extraction from multiple PMS. Despite the  
280 presence of mandatory exchange interfaces, such as Behandlungsdatentransfer (BDT) or the "archive  
281 and exchange" interface, developing standardized interfaces has proven to be a complex and  
282 collaborative effort involving various stakeholders (3, 29). This includes patients, PMS vendors,  
283 standards organizations, and academic institutions. The lack of well-developed interfaces for research  
284 in the ambulatory sector, similar to the hospital sector, hinders the effective utilization of EHR data for  
285 research purposes (11). PMS vendors' resistance to external software modifications further seem to  
286 exacerbate the situation (30).

287 Data quality is another challenge, with a predominance of free-text entries in PMS, making complete  
288 anonymization a complex task (31). EHRs encompass structured data, which is organized, quantifiable  
289 and easily analyzable due to its mostly standardized format, and unstructured data, including free-text  
290 and images. A comprehensive understanding of a patients' health history necessitates the integration  
291 of both types (3). Collaboration with the MII has introduced a Broad Consent concept that allows  
292 patients to agree to the scientific use of their data, potentially easing the extraction of free-text  
293 information in the future (27). Therefore, informed consent emerges as a vital component for  
294 advancing EHR-based research.

295 The limited progress and short duration of publicly funded projects, as observed in this review, may be  
296 attributed to insufficient funding and inadequate government support. Recent projects have received  
297 notably meager funding, especially when compared to government-supported initiatives in other  
298 nations (4). The initial projects highlighted in this review enjoyed comparatively substantial public  
299 funding, indicating the need for sustained investment in healthcare research (9). The private funding  
300 of the DA by pharmaceutical companies appears to be a contributing factor to its success.

301 The results indicate that Germany ranks 16th out of 20 analyzed countries in terms of EHR  
302 implementation. This ranking places Germany behind countries like Sweden, Estonia, and the UK,  
303 which have emerged as pioneers in EHR adoption and integration (32, 33). The rapid digitalization of  
304 healthcare systems has significantly influenced the development of primary care data collection  
305 initiatives (4). It is crucial to examine the reasons behind this disparity in EHR adoption and its impact  
306 on healthcare research.

307 Sweden, for example, has efficiently collected and managed patient data through an integrated system  
308 including a unique personal identity number, focusing on patient consent and supporting research and  
309 quality enhancement (34). Estonia adopted a comprehensive eHealth strategy in 2008, utilizing  
310 incentives and penalties to establish a cohesive eHealth infrastructure (35). The UK's Clinical Practice

1  
2  
3 311 Research Datalink stands out as a prominent real-world research service that has contributed data to  
4 312 over 3,000 publications, surpassing all German projects combined by more than twelvefold (36). The  
5 313 success of these initiatives can be attributed to factors like opt-out regulations, data quality  
6 314 improvements, and the engagement of healthcare providers (37).

8 315 Our findings, as presented in the results section, also hold implications for the use of EHR databases in  
9 316 healthcare and epidemiological research. The results highlight the versatility of EHR databases in  
10 317 addressing a wide range of healthcare-related questions, such as evaluating prescription patterns,  
11 318 treatment outcomes, and analyzing incidence, prevalence, and comorbidities.

14 319 It's noteworthy that a substantial proportion of the studies we identified (n = 205, 85%) were derived  
15 320 from the privately funded DA, with a substantial amount (n = 72, 30%) of the studies being industry-  
16 321 funded. This raises important questions about the influence of commercial interests in health services  
17 322 research. It underscores the critical need for transparency and rigor in such studies to maintain  
18 323 scientific integrity, particularly in light of the increasing use of real-world evidence in early benefit  
19 324 assessments of novel therapies (38).

## 22 325 Limitations

24 326 One major limitation of this scoping review is incomplete information about some projects. Some  
25 327 information, especially from the DA, is not publicly available due to company confidentiality reasons.  
26 328 A second limitation was mainly identified during the phase of classifying the publications. We  
27 329 developed our own classification system, as we were not able to identify a common classification  
28 330 method in the literature. Some publications listed by the projects' homepages were not included in  
29 331 our final analysis, because we were not able to verify that they included data using EHR databases. Out  
30 332 of the 241 included publications, we retrieved full-text for 210 papers and extracted information from  
31 333 the abstracts for the remaining 31. Many studies did not describe their study design in detail and might  
32 334 have been classified wrongly. Finally, we only used three literature databases for our investigation,  
33 335 including one database (LIVIVO) that also includes gray literature.

## 37 336 Conclusion

38 337 The development and sustainability of German primary care data collection projects face several  
39 338 challenges, including limited funding, technical issues related to data extraction, and stringent data  
40 339 protection regulations. Interfaces for data exchange and research remain inadequately implemented.  
41 340 Furthermore, questions regarding data quality and the broad utilization of ambulatory EHRs for  
42 341 research persist, largely due to the significant amount of information entered in free-text fields. This  
43 342 data can only be partially extracted with patients' informed consent, thereby constraining the range  
44 343 of research publications, primarily focusing on (pharmaco-)epidemiologic topics derived from a  
45 344 privately funded database. As a result, Germany has yet to fully realize the potential for research made  
46 345 possible by EHRs.

## 51 346 References

52 347

## 56 348 Abbreviations

57 349 BDT: Behandlungsdatentransfer; BeoNet: Beobachtungspraxen-Netzwerk; BMBF: Bundesministerium  
58 350 für Bildung und Forschung (Federal Ministry of Education and Research); BMI: Body Mass Index;

1  
2  
3 351 CONTENT: CONTinuous morbidity registration Epidemiologic NeTwork; CPRD: Clinical Practice  
4 352 Research Datalink; DA: Disease Analyzer; EHR: Electronic Health Record; GP: general practitioner; HL7  
5 353 FHIR: Health Level 7 Fast Health Interoperability Resource; ICPC: International Classification of Primary  
6 354 Care; MedVip: Medizinische Versorgung in Praxen; MeSH: Medical Subject Headings; MII: Medical  
7 355 Informatics Initiative; n. a.: not available; PI: principal investigator; PMS: Practice management system;  
8 356 PRISMA-ScR: Preferred Reporting Items for Systematic Reviews and Meta-Analyses extension for  
9 357 Scoping Reviews; RADARplus: Routine Anonymised Data for Advanced Health Services Research plus.

## 358 Supplementary Information

15 359 Table S1: Search Strings. Table S2: Collected Variables. Table S3: Data evaluation, access, and  
16 360 recruitment. Table S4: List of included studies.

## 361 Acknowledgements

21 362 For proofreading we acknowledge Dawn M. Bielawski, PhD.

## 363 Authors' contributions

25 364 KM, JM, and SU developed the methodological concept. KM, JM, and JS screened study titles and  
26 365 abstracts and examined the full texts for inclusion. KM, JM, JS, JC, TF and PJ developed the figures and  
27 366 tables. KM, JM, SU, TF, RM, PJ and JC participated in reading and approving the final manuscript.

## 367 Funding

33 368 This study received no funding.

## 369 Availability of data and materials

37 370 All data generated and analyzed by this study are included in this published article.

## 371 Declarations

### 372 Ethics approval and consent to participate

44 373 Not applicable.

### 374 Consent for publication

48 375 Not applicable.

### 376 Competing interests

52 377 The authors have confirmed that we have no competing interests.

54 378

56 379 1. (ONC) TootNcfHIT. FAQ: what is an electronic health record 2023 [Available from:  
57 380 [https://www.healthit.gov/faq/what-electronic-health-record-ehr#:~:text=An%20electronic%20health%20record%20\(EHR\)%20is%20a%20digital%20version%20of, and%20securely%20to%20authorized%20users.](https://www.healthit.gov/faq/what-electronic-health-record-ehr#:~:text=An%20electronic%20health%20record%20(EHR)%20is%20a%20digital%20version%20of, and%20securely%20to%20authorized%20users.)  
58 381  
59 382

- 1  
2  
3 383 2. Modi S, Feldman SS. The Value of Electronic Health Records Since the Health Information  
4 384 Technology for Economic and Clinical Health Act: Systematic Review. *JMIR Med Inform.*  
5 385 2022;10(9):e37283.
- 6 386 3. Nordo AH, Levaux HP, Becnel LB, Galvez J, Rao P, Stem K, et al. Use of EHRs data for clinical  
7 387 research: Historical progress and current applications. *Learn Health Syst.* 2019;3(1):e10076.
- 8 388 4. Gentil ML, Cuggia M, Fiquet L, Hagenbourger C, Le Berre T, Banatre A, et al. Factors influencing  
9 389 the development of primary care data collection projects from electronic health records: a systematic  
10 390 review of the literature. *BMC Med Inform Decis Mak.* 2017;17(1):139.
- 11 391 5. Swart E, Gothe H, Hoffmann F, Ihle P, Schubert I, Stallmann C, et al. Sonderheft Methodische  
12 392 Aspekte der Sekundärdatenanalyse. *Gesundheitswesen.* 2020;82(S 01):S1-S3.
- 13 393 6. Schubert I, Köster I, Küpper-Nybelen J, Ihle P. [Health services research based on routine data  
14 394 generated by the SHI. Potential uses of health insurance fund data in health services research].  
15 395 *Bundesgesundheitsblatt Gesundheitsforschung Gesundheitsschutz.* 2008;51(10):1095-105.
- 16 396 7. Akmatov MK, Holstiege J, Steffen A, Bätzing J. Utilization of influenza vaccination among  
17 397 chronically ill individuals in Germany: A nationwide claims-based analysis. *Vaccine.* 2021;39(6):952-60.
- 18 398 8. Blümel M, Spranger A, Achstetter K, Maresso A, Busse R. Germany: Health System Review.  
19 399 *Health Syst Transit.* 2020;22(6):1-272.
- 20 400 9. Bundesausschuss G. Innovationsfonds 2022 [Available from: [https://innovationsfonds.g-  
21 401 ba.de/](https://innovationsfonds.g-ba.de/).
- 22 402 10. Forschung BfBu. Allgemeinmedizin: Liste der abgeschlossenen Vorhaben 2022 [Available from:  
23 403 <https://www.gesundheitsforschung-bmbf.de/de/allgemeinmedizin-2624.php>.
- 24 404 11. Gematik. Informations-technische Systeme im Krankenhaus 2022 [Available from:  
25 405 <https://fachportal.gematik.de/informationen-fuer/isik#c3740>.
- 26 406 12. Mach Sv. Praxis-Software: Leichter zum PVS-Wechsel? : hausarzt.digital; 2021 [Available from:  
27 407 <https://www.hausarzt.digital/praxis/praxisfuehrung/leichter-zum-pvs-wechsel-95031.html>.
- 28 408 13. Bundesvereinigung K. KBV-Installationsstatistik. 2022.
- 29 409 14. Statista. Anzahl ambulanter ärztlicher Behandlungsfälle und behandelter Personen in  
30 410 Deutschland in den Jahren 2004 bis 2020. 2020 [Available from:  
31 411 [https://de.statista.com/statistik/daten/studie/75608/umfrage/von-aerzten-behandelte-personen-  
32 412 und-aerztliche-](https://de.statista.com/statistik/daten/studie/75608/umfrage/von-aerzten-behandelte-personen-und-aerztliche-).
- 33 413 15. Casey JA, Schwartz BS, Stewart WF, Adler NE. Using Electronic Health Records for Population  
34 414 Health Research: A Review of Methods and Applications. *Annu Rev Public Health.* 2016;37:61-81.
- 35 415 16. Kruse CS, Stein A, Thomas H, Kaur H. The use of Electronic Health Records to Support  
36 416 Population Health: A Systematic Review of the Literature. *J Med Syst.* 2018;42(11):214.
- 37 417 17. Cowie MR, Blomster JI, Curtis LH, Duclaux S, Ford I, Fritz F, et al. Electronic health records to  
38 418 facilitate clinical research. *Clin Res Cardiol.* 2017;106(1):1-9.
- 39 419 18. Munn Z, Peters MDJ, Stern C, Tufanaru C, McArthur A, Aromataris E. Systematic review or  
40 420 scoping review? Guidance for authors when choosing between a systematic or scoping review  
41 421 approach. *BMC Med Res Methodol.* 2018;18(1):143.
- 42 422 19. Tricco AC, Lillie E, Zarin W, O'Brien KK, Colquhoun H, Levac D, et al. PRISMA Extension for  
43 423 Scoping Reviews (PRISMA-ScR): Checklist and Explanation. *Ann Intern Med.* 2018;169(7):467-73.
- 44 424 20. Bundesamt S. Datenquelle: IQVIATM Disease Analyzer 2023 [Available from: [https://www.gbe-  
45 425 bund.de/gbe/ergebnisse.prc\\_tab?fid=453&suchstring=&query\\_id=&sprache=D&fund\\_typ=DQ&meth  
46 426 ode=&vt=&verwandte=1&page\\_ret=0&seite=1&p\\_sprachkz=D&p\\_uid=&p\\_lfd\\_nr=&p\\_news=&aid  
47 427 =&hlp\\_nr=&p\\_janein=](https://www.gbe-bund.de/gbe/ergebnisse.prc_tab?fid=453&suchstring=&query_id=&sprache=D&fund_typ=DQ&methode=&vt=&verwandte=1&page_ret=0&seite=1&p_sprachkz=D&p_uid=&p_lfd_nr=&p_news=&aid=&hlp_nr=&p_janein=).
- 48 428 21. Bahls T, Pung J, Heinemann S, Hauswaldt J, Demmer I, Blumentritt A, et al. Designing and  
49 429 piloting a generic research architecture and workflows to unlock German primary care data for  
50 430 secondary use. *J Transl Med.* 2020;18(1):394.
- 51 431 22. Becher H, Kostev K, Schroder-Bernhardi D. Validity and representativeness of the "Disease  
52 432 Analyzer" patient database for use in pharmacoepidemiological and pharmaco-economic studies. *Int J  
53 433 Clin Pharmacol Ther.* 2009;47(10):617-26.



- 1  
2  
3 434 23. Laux G, Koerner T, Rosemann T, Beyer M, Gilbert K, Szecsenyi J. The CONTENT project: a  
4 435 problem-oriented, episode-based electronic patient record in primary care. *Inform Prim Care*.  
5 436 2005;13(4):249-55.  
6 437 24. Doctors WOOF. International Classification of Primary Care 2016 [Available from:  
7 438 [https://www.globalfamilydoctor.com/site/DefaultSite/filesystem/documents/Groups/WICC/Internati](https://www.globalfamilydoctor.com/site/DefaultSite/filesystem/documents/Groups/WICC/International%20Classification%20of%20Primary%20Care%20Dec16.pdf)  
8 439 [onal%20Classification%20of%20Primary%20Care%20Dec16.pdf](https://www.globalfamilydoctor.com/site/DefaultSite/filesystem/documents/Groups/WICC/International%20Classification%20of%20Primary%20Care%20Dec16.pdf).  
9 440 25. Lingner H, Aumann I, Wacker M, Kreuter M, Leidl R, von der Schulenburg JG, et al. [Health  
11 441 Science Research with Primary Care Routine Data From Electronic Patient Records: the BeoNet  
12 442 Registry]. *Gesundheitswesen*. 2018;80(11):1026-34.  
13 443 26. Moser K, Mikolajczyk R, Bauer A, Tiller D, Christoph J, Purschke O, et al. [BeoNet-Halle-  
14 444 development of a multifunctional database for the automated extraction of healthcare data from  
15 445 general practitioner and specialist practices]. *Bundesgesundheitsblatt Gesundheitsforschung*  
16 446 *Gesundheitsschutz*. 2023;66(5):569-77.  
17 447 27. Medizininformatikinitiative. Template text for patient consent forms 2023 [Available from:  
18 448 <https://www.medizininformatik-initiative.de/en/template-text-patient-consent-forms>.  
19 449 28. Bundesvereinigung K. IT in der Arztpraxis: Datensatzbeschreibung KVDT 2023 2023 [Available  
20 450 from: [https://update.kbv.de/ita-](https://update.kbv.de/ita-update/Abrechnung/KBV_ITA_VGEX_Datensatzbeschreibung_KVDT.pdf)  
21 451 [update/Abrechnung/KBV\\_ITA\\_VGEX\\_Datensatzbeschreibung\\_KVDT.pdf](https://update.kbv.de/ita-update/Abrechnung/KBV_ITA_VGEX_Datensatzbeschreibung_KVDT.pdf).  
22 452 29. Justiz Bd. Integration offener und standardisierter Schnittstellen in informationstechnische  
23 453 Systeme 2022 [Available from: [https://www.gesetze-im-internet.de/sgb\\_5/\\_371.html](https://www.gesetze-im-internet.de/sgb_5/_371.html).  
24 454 30. Ayaz M, Pasha MF, Alzahrani MY, Budiarto R, Stiawan D. The Fast Health Interoperability  
25 455 Resources (FHIR) Standard: Systematic Literature Review of Implementations, Applications, Challenges  
26 456 and Opportunities. *JMIR Med Inform*. 2021;9(7):e21929.  
27 457 31. Martin-Sanchez FJ, Aguiar-Pulido V, Lopez-Campos GH, Peek N, Sacchi L. Secondary Use and  
28 458 Analysis of Big Data Collected for Patient Care. *Yearb Med Inform*. 2017;26(1):28-37.  
29 459 32. Bertram N, Püschner F, Gonçalves ASO, Binder S, Amelung VE. Einführung einer elektronischen  
30 460 Patientenakte in Deutschland vor dem Hintergrund der internationalen Erfahrungen. In: Klauber J,  
31 461 Geraedts M, Friedrich J, Wasem J, editors. *Krankenhaus-Report 2019: Das digitale Krankenhaus*. Berlin,  
32 462 Heidelberg: Springer Berlin Heidelberg; 2019. p. 3-16.  
33 463 33. Amelung V BS, Bertram N, Chase DP, Urbanski D. Die elektronische Patientenakte – Fundament  
34 464 einer effektiven und effizienten Gesundheitsversorgung. Heidelberg: medhochzwei Verlag; 2016.  
35 465 34. Kajbjer K, Nordberg R, Klein GO, editors. *Electronic Health Records in Sweden: From*  
36 466 *Administrative Management to Clinical Decision Support. History of Nordic Computing 3; 2011 2011//;*  
37 467 Berlin, Heidelberg: Springer Berlin Heidelberg.  
38 468 35. World Health Organization. Regional Office for Europe EOoHSaP, Habicht, Triin, Reinap, Marge,  
39 469 Kasekamp, Kaija. et al. Estonia: health system review. . Regional Office for Europe.: World Health  
40 470 Organization.; 2018.  
41 471 36. CPRD. Clinical Practice Research Datalink 2022 [Available from: <https://cprd.com/>.  
42 472 37. Research NifHaC. Safeguarding patient data 2023 [Available from:  
43 473 <https://cprd.com/safeguarding-patient-data>.  
44 474 38. Schad F, Thronicke A. Real-World Evidence-Current Developments and Perspectives. *Int J*  
45 475 *Environ Res Public Health*. 2022;19(16).  
46  
47  
48  
49  
50  
51 476  
52  
53  
54  
55  
56  
57  
58  
59  
60

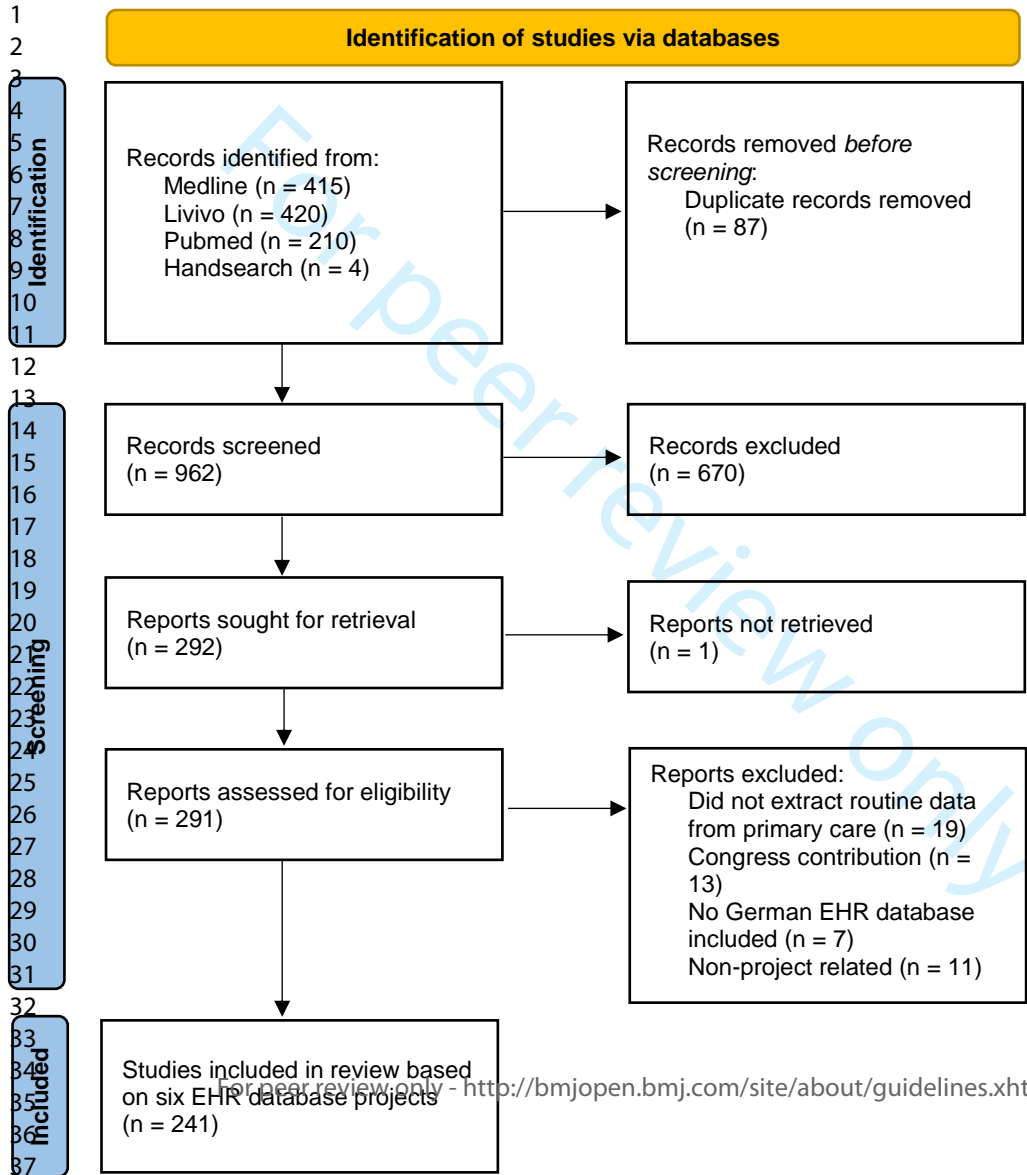

1  
2  
3  
4  
5  
6  
7  
8  
9  
10  
11  
12  
13  
14  
15  
16  
17  
18  
19  
20  
21  
22  
23  
24  
25  
26  
27  
28  
29  
30  
31  
32  
33  
34  
35  
36  
37  
38  
39  
40  
41

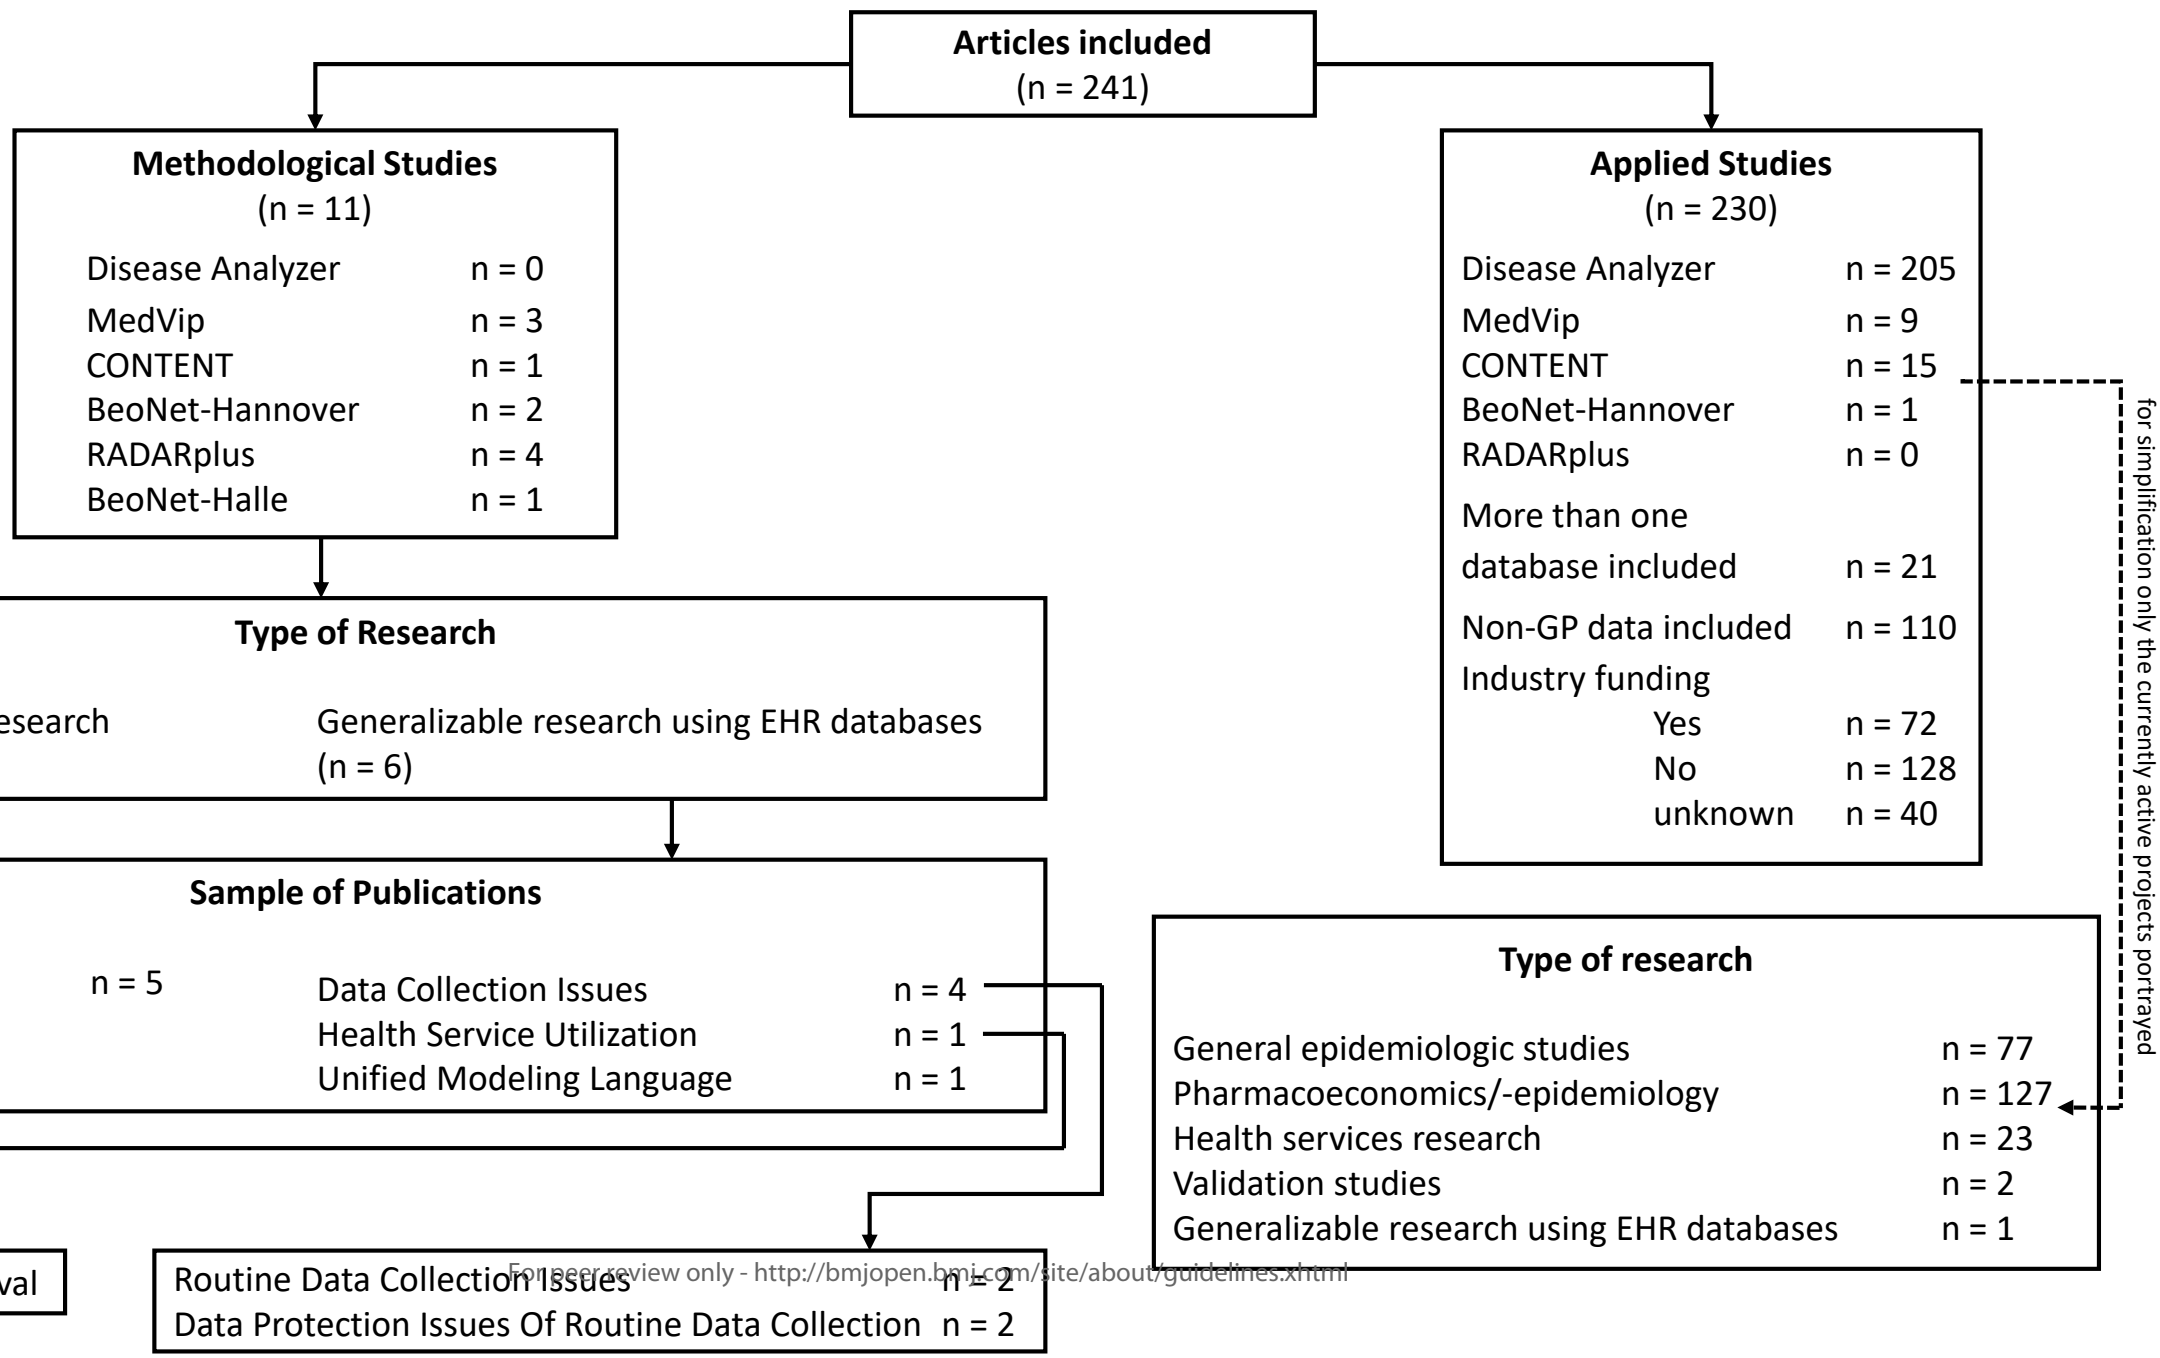

## Search Strategies

Table 1: Search String for Ovid (June 2022)

| Set | Search Statement                                                           | Results |
|-----|----------------------------------------------------------------------------|---------|
| 1.  | exp Primary Health Care/                                                   |         |
| 2.  | exp General Practice/                                                      |         |
| 3.  | general practitioners/ or physicians, family/ or physicians, primary care/ |         |
| 4.  | general practi*.tw.                                                        |         |
| 5.  | (primary adj3 care).tw.                                                    |         |
| 6.  | (family adj3 (practi* or doctor or physician*)).tw.                        |         |
| 7.  | or/1-6                                                                     |         |
| 8.  | exp medical records/                                                       |         |
| 9.  | exp routinely collected health data/                                       |         |
| 10. | (routine* adj3 (collect* or record* or document*)).tw.                     |         |
| 11. | health servic* research.tw.                                                |         |
| 12. | (electronic adj3 record*).tw.                                              |         |
| 13. | CONTinuous morbidity registration Epidemiologic NeTwork.tw.                |         |
| 14. | Disease Analyzer.tw.                                                       |         |
| 15. | or/8-14                                                                    |         |
| 16. | exp Germany/                                                               |         |
| 17. | German*.tw.                                                                |         |
| 18. | or/16-17                                                                   |         |
| 19. | 7 and 15 and 18                                                            | 415     |

Table 2: Search String LIVIVO (June 2022)

| Set | Search Statement              | Results |
|-----|-------------------------------|---------|
| 1   | Haus?rzt                      |         |
| 2   | Primär?rzt*                   |         |
| 3   | Allgemein?rztlich*            |         |
| 4   | Allgemeinmedizin*             |         |
| 5   | Ambulant*                     |         |
| 6   | OR 1-5                        |         |
| 7   | Routinedaten*                 |         |
| 8   | BDT                           |         |
| 9   | Elektronische* Patientenakte* |         |
| 10  | OR 7-9                        |         |
| 11  | 6 AND 10                      | 420     |

### Pubmed (NLM)

Search terms (June 2022):

"Germany"[All Fields] AND "Disease Analyzer"[All Fields]

**210 studies were imported**

Table S2: Collected variables

|                               |                                                            | IQVIA™ Disease Analyzer     | MedVip  | CONTENT                      | BeoNet Hannover             | RADARplus                                                        | BeoNet Halle                |
|-------------------------------|------------------------------------------------------------|-----------------------------|---------|------------------------------|-----------------------------|------------------------------------------------------------------|-----------------------------|
| <b>Physician types</b>        | All                                                        | ✓                           | -       | -                            | -                           | -                                                                | ✓                           |
|                               | General Practitioner                                       | ✓                           | ✓       | ✓                            | ✓                           | ✓                                                                | ✓                           |
|                               | Pneumologists                                              | ✓                           | -       | -                            | ✓                           | -                                                                | ✓                           |
|                               | Paediatricians                                             | ✓                           | -       | -                            | -                           | -                                                                | ✓                           |
|                               | Internists                                                 | ✓                           | -       | ✓                            | -                           | ✓                                                                | ✓                           |
| <b>Physician demographics</b> | Physician number                                           | -                           | unknown | -                            | ✓                           | unknown                                                          | ✓                           |
|                               | Age                                                        | ✓                           | -       | ✓                            | -                           | -                                                                | ✓                           |
|                               | Gender                                                     | ✓                           | -       | ✓                            | -                           | -                                                                | ✓                           |
|                               | Years in practice                                          | ✓                           | -       | ✓                            | -                           | -                                                                | ✓                           |
| <b>Practices demographics</b> | Type                                                       | ✓                           | -       | ✓                            | ✓                           | ✓                                                                | ✓                           |
|                               | Region                                                     | ✓                           | ✓       | ✓                            | ✓                           | ✓                                                                | ✓                           |
|                               |                                                            | east or west                |         | east or west                 |                             |                                                                  | east or west                |
|                               | Frequency of patients                                      | ✓                           |         |                              | ✓                           |                                                                  | ✓                           |
|                               | No. of doctors                                             | ✓                           |         | ✓                            | ✓                           |                                                                  | ✓                           |
|                               | No. of employees                                           | ✓                           |         | ✓                            | ✓                           |                                                                  | ✓                           |
| <b>Patient demographics</b>   | Age                                                        | ✓                           | ✓       | ✓                            | ✓                           | ✓                                                                | ✓                           |
|                               | Gender                                                     | ✓                           | ✓       | ✓                            | ✓                           | ✓                                                                | ✓                           |
|                               | Patient since                                              | -                           | -       | -                            | ✓                           | -                                                                | ✓                           |
|                               | Employment                                                 | -                           | -       | ✓                            | ✓                           | -                                                                | -                           |
|                               | Medical insurance status                                   | ✓<br>(private or statutory) | -       | ✓<br>(private or statutory)  | ✓<br>(private or statutory) | -                                                                | ✓<br>(private or statutory) |
|                               | Medical insurance provider                                 | ✓                           | -       | -                            | ✓                           | -                                                                | -                           |
|                               | Region                                                     | ✓<br>east or west           | -       | ✓                            | ✓                           | -                                                                | ✓                           |
|                               | Nationality                                                | unknown                     | -       | ✓                            | ✓                           | -                                                                | ✓                           |
| <b>BMI and risk factors</b>   | BMI; smoking and alcohol recording rarely documented (~5%) | smoking                     | unknown | BMI, risk factors, allergies | -                           | BMI, BP, HR, allergies, operations, smoking status, risk factors |                             |

|                                                             |                                                                                              |                                                              |                                                                                               |                                                                             |                                                              |                                                                                    |
|-------------------------------------------------------------|----------------------------------------------------------------------------------------------|--------------------------------------------------------------|-----------------------------------------------------------------------------------------------|-----------------------------------------------------------------------------|--------------------------------------------------------------|------------------------------------------------------------------------------------|
| <b>Social history</b>                                       | unknown                                                                                      | -                                                            | unknown                                                                                       | -                                                                           | -                                                            | -                                                                                  |
| <b>Pregnancy or family status</b>                           | pregnancy, gynecologist records; family data incomplete                                      | -                                                            | unknown                                                                                       | pregnancy, number of children                                               | -                                                            | pregnancy, number of children                                                      |
| <b>Diagnosis</b>                                            | diagnosis, ICD 10 codes and original text                                                    | diagnosis, ICD 10 codes and original text, billing codes     | diagnosis, ICD 10 codes, ICPC codes and original text, reasons for encounter, medical history | diagnosis, ICD 10 codes, medical history                                    | diagnosis, ICD 10 codes, medical history                     | diagnosis name, ICD 10 codes, medical history,                                     |
| <b>Billing codes</b>                                        | unknown                                                                                      | yes                                                          | yes                                                                                           | yes                                                                         | unknown                                                      | yes                                                                                |
| <b>procedures, findings, therapies</b>                      | lab test results; other test results variably available or can be requested from paper files | unknown                                                      | lab test results                                                                              | lab and X-ray test results, blood pressure, internal and external findings, | unknown                                                      | lab and X-ray test results, blood pressure, internal and external findings         |
| <b>drug information</b>                                     | drug name, route, dosage, frequency, duration, cost of therapy                               | drug name                                                    | drug name, long term medication, dosage, cost of therapy                                      | drug name and ATC code, (long term) medication, cost of therapy             | drug name, long-term medication, date                        | drug name and ATC code, (long term) medication, dosage, frequency, cost of therapy |
| <b>Healthcare utilization</b>                               | practice visits, referrals, sick leave, hospitalizations                                     | unknown                                                      | practice visits, referrals, sick leave, hospitalizations                                      | practice visits, referrals, sick leave, hospitalizations                    | unknown                                                      | practice visits, referrals, sick leave, hospitalizations                           |
| <b>Images (e.g X-ray)</b>                                   | unknown                                                                                      | no                                                           | no                                                                                            | no                                                                          | no                                                           | no                                                                                 |
| <b>Projects obtaining additional data beyond usual care</b> | yes, Quality of Life questionnaires upon request                                             | yes, study specific                                          | n. a.                                                                                         | yes, study specific                                                         | yes, study specific                                          | yes, study specific                                                                |
| <b>Missing Data</b>                                         | Social and economic data (salary, family status, employment), secondary care data            | social and economic data (salary, family status, employment) | social and economic data (salary, family status, employment), secondary care data,            | social and economic data (salary, family status, employment)                | social and economic data (salary, family status, employment) | social and economic data (salary, family status, employment)                       |

Table S3: Data evaluation and access and recruitment

|                                      | <b>IQVIA™ Disease Analyzer</b>  | <b>BeoNet Halle</b>                             | <b>BeoNet Hannover</b>                          | <b>CONTENT</b>                                                                           | <b>MedVip</b>                              | <b>RADARplus</b>                           |
|--------------------------------------|---------------------------------|-------------------------------------------------|-------------------------------------------------|------------------------------------------------------------------------------------------|--------------------------------------------|--------------------------------------------|
| In-house data evaluation             | ✓                               | ✓                                               | ✓                                               | ✓                                                                                        | ✓                                          | ✓                                          |
| Feedback reports to practices        | ✓                               | ✓                                               | ✓                                               | ✓                                                                                        | ✓                                          | n.a.                                       |
| Interim project reports              | n.a.                            | ✓                                               | ✓                                               | ✓                                                                                        | ✓                                          | n.a.                                       |
| Internal practice data accessibility | -                               | -                                               | -                                               | ✓                                                                                        | -                                          | -                                          |
| External data access                 | ✓                               | ✓                                               | -                                               | -                                                                                        | -                                          | ✓                                          |
| Financial incentives                 | Yes, but amount unknown         | 2 € per signed broad consent                    | -                                               | Quarterly 375 € per practice                                                             | 500 € once per physician                   | unknown                                    |
| Type of physician support            | support how to use the software | establishing a practice research infrastructure | establishing a practice research infrastructure | Training in ICPC coding, hotline for software problems & regular quality circle meetings | On-site support to extract requested data. | On-site support to extract requested data. |
| Recruitment Strategy                 | Snowball                        | n.a.                                            | ✓                                               | ✓                                                                                        | -                                          | -                                          |
|                                      | Presentations                   | n.a.                                            | ✓                                               | -                                                                                        | ✓                                          | ✓                                          |
|                                      | Circulars                       | n.a.                                            | -                                               | -                                                                                        | ✓                                          | ✓                                          |
|                                      | Articles                        | n.a.                                            | ✓                                               | ✓                                                                                        | ✓                                          | with 2 reminders<br>✓                      |
|                                      | Homepage                        | n.a.                                            | ✓                                               | ✓                                                                                        | ✓                                          | -<br>✓                                     |
| Patient recruiter                    | -                               | Attending physician or study nurse              | Attending physician                             | -                                                                                        | Attending physician                        | Trusted third party                        |
| n.a.: not available                  |                                 |                                                 |                                                 |                                                                                          |                                            |                                            |



| DOI                              | Title                                                       | Authors          | First Author  | Journal           | Publication year | project          | type of research    | subject area                         |
|----------------------------------|-------------------------------------------------------------|------------------|---------------|-------------------|------------------|------------------|---------------------|--------------------------------------|
| 10.1111/j.1742-1241.2008.01895.x | A retrospective database study comparing treatment out      | S. Aballéa; S. C | Aballéa S     | Int J Clin Pract  | 2008             | Disease Analyzer | Applied studies     | Pharmacoeconomics/-epidemiology      |
| 10.1136/ard.2007.076232          | Gout in the UK and Germany: prevalence, comorbidities       | L. Annemans;     | Annemans L    | Annals of the     | 2008             | Disease Analyzer | Applied studies     | General epidemiologic studies        |
| 10.1186/s12967-020-02547-x       | Designing and piloting a generic research architecture an   | T. Bahls; J. Pu  | Bahls T       | Journal of Tra    | 2020             | RADARplus        | Methodological stud | Database-specific research           |
| 10.4088/JCP.19m13205             | To Be Continued? Long-Term Treatment Effects of Antid       | C. Bartels; M.   | Bartels C     | J Clin Psychiat   | 2020             | Disease Analyzer | Applied studies     | Pharmacoeconomics/-epidemiology      |
| 10.5414/cpp47617                 | Validity and representativeness of the Disease Analyzer     | H. Becher; K.    | Becher H      | International J   | 2009             | Disease Analyzer | Applied studies     | Validation studies                   |
| 10.5414/cp201756                 | Economic prescribing of corticosteroid nasal sprays in Ge   | B. Becker; S. K  | Becker B      | Int J Clin Phari  | 2013             | Disease Analyzer | Applied studies     | Pharmacoeconomics/-epidemiology      |
| 10.1055/s-0043-104931            | [High Prevalence of Antipsychotic Medication Use in De]     | J. Bohlken; A.   | Bohlken J     | Fortschr Neur     | 2017             | Disease Analyzer | Applied studies     | Pharmacoeconomics/-epidemiology      |
| 10.3233/jad-180567               | Relevance of Coded Prodromal Mild Cognitive Impairme        | J. Bohlken; K.   | Bohlken J     | J Alzheimers D    | 2018             | Disease Analyzer | Applied studies     | General epidemiologic studies        |
| 10.3233/jad-181180               | Coded Prevalence of Mild Cognitive Impairment in Gene       | J. Bohlken; K.   | Bohlken J     | J Alzheimers D    | 2019             | Disease Analyzer | Applied studies     | General epidemiologic studies        |
| 10.3233/jad-190012               | Diagnostic Behavior for Mild Cognitive Impairment in Ge     | J. Bohlken; K.   | Bohlken J     | J Alzheimers D    | 2019             | Disease Analyzer | Applied studies     | General epidemiologic studies        |
| 10.1016/j.psychres.2020.112758   | Adherence to neuroleptic treatment in psychiatric practi    | J. Bohlken; M.   | Bohlken J     | Psychiatry Res    | 2020             | Disease Analyzer | Applied studies     | Pharmacoeconomics/-epidemiology      |
| 10.3233/jad-215348               | Association Between Ginkgo Biloba Extract Prescriptions     | J. Bohlken; O.   | Bohlken J     | J Alzheimers D    | 2022             | Disease Analyzer | Applied studies     | Pharmacoeconomics/-epidemiology      |
| 10.1159/000520574                | Identification of Prodromal Presentations of Parkinson's    | J. Bohlken; A.   | Bohlken J     | Neuroepidem       | 2022             | Disease Analyzer | Applied studies     | Health Services Research             |
| 10.5414/cp202572                 | Persistence with antidepressant drugs in patients with d    | A. Booker; J. B  | Booker A      | Int J Clin Phari  | 2016             | Disease Analyzer | Applied studies     | Pharmacoeconomics/-epidemiology      |
| 10.1017/S1041610215002082        | Risk factors for dementia diagnosis in German primary ca    | A. Booker; L. B  | Booker A      | Int Psychoger     | 2016             | Disease Analyzer | Applied studies     | General epidemiologic studies        |
| 10.3111/13696998.2011.635229     | Real-life treatment patterns, compliance, persistence, an   | L. Breitscheide  | Breitscheidel | J Med Econ        | 2012             | Disease Analyzer | Applied studies     | Pharmacoeconomics/-epidemiology      |
| 10.2217/pmt.14.26                | A description of clinical characteristics and treatment pa  | P. Chevalier; N  | Chevalier P   | Pain Manag        | 2014             | Disease Analyzer | Applied studies     | Pharmacoeconomics/-epidemiology      |
| 10.5414/cp203881                 | Prevalence of and reasons for referral of primary care o    | L. Cirkel; M. K  | Cirkel L      | Int J Clin Phari  | 2021             | Disease Analyzer | Applied studies     | General epidemiologic studies        |
| 10.1016/j.hlc.2017.04.002        | Comparative Effectiveness and Safety of Apixaban and V      | C. I. Coleman;   | Coleman CI    | Heart Lung Cir    | 2018             | Disease Analyzer | Applied studies     | Pharmacoeconomics/-epidemiology      |
| 10.1371/journal.pone.0185642     | Oral anticoagulant persistence in patients with non-valv    | S. L. Collings;  | Collings SL   | PLoS One          | 2017             | Disease Analyzer | Applied studies     | Pharmacoeconomics/-epidemiology      |
| 10.1080/14740338.2017.1376647    | Unspecified intestinal malabsorption in patients treated    | N. De Bortoli;   | De Bortoli N  | Expert Opin D     | 2017             | Disease Analyzer | Applied studies     | Pharmacoeconomics/-epidemiology      |
| 10.1016/j.jctube.2020.100178     | Real-world treatment patterns in patients with nontube      | R. Diel; M. Ob   | Diel R        | J Clin Tuberc C   | 2020             | Disease Analyzer | Applied studies     | Pharmacoeconomics/-epidemiology      |
| 10.1016/j.yebeh.2021.108393      | Epilepsy is associated with an increased incidence of hea   | C. Doege; M.     | Doege C       | Epilepsy Beha     | 2021             | Disease Analyzer | Applied studies     | General epidemiologic studies        |
| 10.1016/j.yebeh.2022.108721      | Atrial fibrillation is associated with a subsequent epilep  | C. Doege; M.     | Doege C       | Epilepsy Beha     | 2022             | Disease Analyzer | Applied studies     | General epidemiologic studies        |
| 10.1016/j.jpsychires.2021.07.018 | Factors associated with the diagnosis of depression in w    | M. Drewes; M     | Drewes M      | J Psychiatr Res   | 2021             | Disease Analyzer | Applied studies     | General epidemiologic studies        |
| 10.1007/s00198-016-3584-9        | Depression risk in female patients with osteoporosis in p   | J. Drosselmey    | Drosselmeyer  | Osteoporos In     | 2016             | Disease Analyzer | Applied studies     | General epidemiologic studies        |
| 10.5414/cp202610                 | Prevalence and type of antidepressant therapy used by G     | J. Drosselmey    | Drosselmeyer  | Int J Clin Phari  | 2016             | Disease Analyzer | Applied studies     | Pharmacoeconomics/-epidemiology      |
| 10.1186/s12889-015-1885-0        | Cost for physician-diagnosed influenza and influenza-like   | B. Ehlken; A. A  | Ehlken B      | BMC Public He     | 2015             | Disease Analyzer | Applied studies     | Pharmacoeconomics/-epidemiology      |
| 10.5414/cp203359                 | Use of azilsartan medoxomil in the primary-care setting     | B. Ehlken; M.    | Ehlken B      | International J   | 2019             | Disease Analyzer | Applied studies     | Pharmacoeconomics/-epidemiology      |
| 10.1007/s00482-016-0110-0        | [Care of patients with cancer pain in general practices in  | P. Engeser; E.   | Engeser P     | Der Schmerz       | 2016             | CONTENT          | Applied studies     | Pharmacoeconomics/-epidemiology      |
| 10.1007/s00392-017-1193-z        | Treatment patterns and low-density lipoprotein cholest      | K. M. Fox; M.    | Fox KM        | Clin Res Card     | 2018             | Disease Analyzer | Applied studies     | Pharmacoeconomics/-epidemiology      |
| 10.22074/ijfs.2021.528397.1113   | Germany Endometriosis Pattern Changes; Prevalence an        | J. Göhring; M.   | Göhring J     | Int J Fertil Ster | 2022             | Disease Analyzer | Applied studies     | General epidemiologic studies        |
| 10.1212/wnl.0000000000002791     | Nonadherence to antiepileptic drugs in Germany: A retr      | S. Gollwitzer;   | Gollwitzer S  | Neurology         | 2016             | Disease Analyzer | Applied studies     | Pharmacoeconomics/-epidemiology      |
| 10.1007/s00198-011-1535-z        | GRAND: the German retrospective cohort analysis on co       | P. Hadji; V. Cl  | Hadji P       | Osteoporos In     | 2012             | Disease Analyzer | Applied studies     | Pharmacoeconomics/-epidemiology      |
| 10.1007/s10549-013-2417-1        | Persistence in patients with breast cancer treated with t   | P. Hadji; V. Zil | Hadji P       | Breast Cancer     | 2013             | Disease Analyzer | Applied studies     | Pharmacoeconomics/-epidemiology      |
| 10.1007/s00432-013-1427-z        | Persistence with bisphosphonates in patients with meta      | P. Hadji; V. Zil | Hadji P       | J Cancer Res C    | 2013             | Disease Analyzer | Applied studies     | Pharmacoeconomics/-epidemiology      |
| 10.1007/s00415-012-6509-3        | Prevalence, utilization, and costs of antiepileptic drugs f | H. M. Hamer;     | Hamer HM      | J Neurol          | 2012             | Disease Analyzer | Applied studies     | Pharmacoeconomics/-epidemiology      |
| 10.1007/s40263-014-0187-x        | Sociodemographic disparities in administration of antiep    | H. M. Hamer;     | Hamer HM      | CNS Drugs         | 2014             | Disease Analyzer | Applied studies     | Pharmacoeconomics/-epidemiology      |
| 10.1016/j.diabres.2016.10.025    | Early drug use of dapagliflozin prescribed by general pra   | M. Hankins; K    | Hankins M     | Diabetes Res C    | 2017             | Disease Analyzer | Applied studies     | Pharmacoeconomics/-epidemiology      |
| 10.1007/s00228-007-0340-2        | Persistence with antihypertensive treatments: results of    | J. Hasford; D.   | Hasford J     | Eur J Clin Phari  | 2007             | Disease Analyzer | Applied studies     | Pharmacoeconomics/-epidemiology      |
| 10.1055/s-0030-1249690           | Influenza-Impfungen durch Niedersächsische Hausärzte        | J. Hauswaldt;    | Hauswaldt J   | Das Gesundhe      | 2010             | MedVip           | Applied studies     | Health services research             |
| 10.3238/arztbl.2012.0814         | Health service use among patients with chronic or multi     | J. Hauswaldt;    | Hauswaldt J   | Dtsch Arztebl     | 2012             | MedVip           | Applied studies     | Health services research             |
| 10.1186/1471-2296-14-162         | The inter-contact interval: a new measure to define freq    | J. Hauswaldt;    | Hauswaldt J   | BMC Family P      | 2013             | MedVip           | Methodological stud | Generalizable research using EHR dat |
| 10.1186/s12875-016-0477-0        | Does an increase in visits to general practice indicate a n | J. Hauswaldt;    | Hauswaldt J   | BMC Family P      | 2016             | MedVip           | Applied studies     | Health services research             |
| 10.1055/a-0668-5817              | Hindernisse bei der sekundären Nutzung hausärztlicher r     | J. Hauswaldt;    | Hauswaldt J   | Gesundheitsw      | 2018             | RADARplus        | Methodological stud | Generalizable research using EHR dat |
| 10.1016/j.zefq.2020.01.002       | [The risk of re-identification when analyzing electronic h  | J. Hauswaldt;    | Hauswaldt J   | Zeitschrift fur   | 2019             | RADARplus        | Methodological stud | Generalizable research using EHR dat |
| 10.1055/a-1676-4020              | [Secondary Use of Electronic Medical Record Data from       | J. Hauswaldt;    | Hauswaldt J   | Gesundheitsw      | 2021             | RADARplus        | Methodological stud | Database-specific research           |
| 10.1002/pds.4836                 | A European multicentre drug utilisation study of the imp    | K. Hedenmalm     | Hedenmalm K   | Pharmacoepid      | 2019             | Disease Analyzer | Applied studies     | Pharmacoeconomics/-epidemiology      |
| 10.1007/s00228-019-02650-z       | Effect of withdrawal of fusafungine from the market on      | K. Hedenmalm     | Hedenmalm K   | Eur J Clin Phari  | 2019             | Disease Analyzer | Applied studies     | Pharmacoeconomics/-epidemiology      |

|    |                                |                                                              |                 |               |                 |      |                  |                     |                                      |
|----|--------------------------------|--------------------------------------------------------------|-----------------|---------------|-----------------|------|------------------|---------------------|--------------------------------------|
| 1  |                                |                                                              |                 |               |                 |      |                  |                     |                                      |
| 2  | 10.1007/s00228-018-02622-9     | Prescribing patterns of tramadol in adults in IMS® prima     | K. Hedenmalm    | Hedenmalm K   | Eur J Clin Phar | 2019 | Disease Analyzer | Applied studies     | Pharmacoeconomics/-epidemiology      |
| 3  | 10.1007/s40264-021-01087-7     | Is There an Increased Risk of Hepatotoxicity with Metam      | K. Hedenmalm    | Hedenmalm K   | Drug Saf        | 2021 | Disease Analyzer | Applied studies     | Pharmacoeconomics/-epidemiology      |
| 4  | 10.5414/cp204177               | Association between contraceptive use and risk of lower      | J. Heidemann    | Heidemann J   | Int J Clin Phar | 2022 | Disease Analyzer | Applied studies     | Pharmacoeconomics/-epidemiology      |
| 5  | 10.1111/jog.12384              | Use of antidiabetic agents in the treatment of gestation     | C. Heilmaier; C | Heilmaier C   | J Obstet Gyna   | 2014 | Disease Analyzer | Applied studies     | Pharmacoeconomics/-epidemiology      |
| 6  | 10.3390/antibiotics10060685    | Treatment of Urinary Tract Infections with Canephron®        | M. Höller; H. S | Höller M      | Antibiotics (Ba | 2021 | Disease Analyzer | Applied studies     | Pharmacoeconomics/-epidemiology      |
| 7  | 10.1055/s-2003-37698           | Versorgungsforschung mit hausärztlichen Routinedaten         | E. Hummers-P    | Hummer-Prac   | Das Gesundhe    | 2003 | MedVip           | Methodological stud | Generalizable research using EHR dat |
| 8  | 10.1055/s-0029-1244827         | Umsetzung von diagnostischenEmpfehlungen bei Herzin          | E. Hummers-P    | Hummer-Prac   | Deutsche Med    | 2010 | MedVip           | Applied studies     | Health services research             |
| 9  | 10.1055/s-2006-924261          | Incremental prescription and drug costs during the year      | A. Icks; B. Ha  | Icks A        | Exp Clin Endoc  | 2006 | Disease Analyzer | Applied studies     | Pharmacoeconomics/-epidemiology      |
| 10 | 10.5414/cpp45516               | Cost comparison analysis: pentaerythrithyl tetranitrate      | A. Icks; B. Ha  | Icks A        | Int J Clin Phar | 2007 | Disease Analyzer | Applied studies     | Pharmacoeconomics/-epidemiology      |
| 11 | 10.1007/s00432-015-2091-2      | Cancer is associated with intraoperative and postproced      | L. Jacob; K. Ko | Jacob L       | Journal of can  | 2015 | Disease Analyzer | Applied studies     | General epidemiologic studies        |
| 12 | 10.1007/s00432-015-2048-5      | Prevalence of depression, anxiety and their risk factors     | L. Jacob; L. Bl | Jacob L       | J Cancer Res C  | 2016 | Disease Analyzer | Applied studies     | General epidemiologic studies        |
| 13 | 10.3205/000229                 | Gender-based differences in the antidepressant treatme       | L. Jacob; K. Ko | Jacob L       | Ger Med Sci     | 2016 | Disease Analyzer | Applied studies     | Pharmacoeconomics/-epidemiology      |
| 14 | 10.1016/j.jdiacomp.2016.04.003 | Impact of metformin on metastases in patients with bre       | L. Jacob; K. Ko | Jacob L       | J Diabetes Cor  | 2016 | Disease Analyzer | Applied studies     | Pharmacoeconomics/-epidemiology      |
| 15 | 10.3205/000233                 | Impact of caesarean section on mode of delivery, pregn       | L. Jacob; S. Ta | Jacob L       | Ger Med Sci     | 2016 | Disease Analyzer | Applied studies     | Health Services Research             |
| 16 | 10.1007/s00404-016-4160-4      | Caesarean section and its impact on fertility and time to    | L. Jacob; K. W  | Jacob L       | Arch Gynecol    | 2016 | Disease Analyzer | Applied studies     | Health Services Research             |
| 17 | 10.5414/cp202729               | Prescription patterns and drug costs in German patients      | L. Jacob; J. Bo | Jacob L       | Int. Journal of | 2017 | Disease Analyzer | Applied studies     | Pharmacoeconomics/-epidemiology      |
| 18 | 10.5414/cp202754               | Risk of dementia in German patients treated with antide      | L. Jacob; J. Bo | Jacob L       | Int J Clin Phar | 2017 | Disease Analyzer | Applied studies     | Pharmacoeconomics/-epidemiology      |
| 19 | 10.1016/j.yebeh.2018.10.035    | Incidence of epilepsy and associated factors in elderly pa   | L. Jacob; J. Bo | Jacob L       | Epilepsy &am    | 2019 | Disease Analyzer | Applied studies     | General epidemiologic studies        |
| 20 | 10.1007/s00296-018-4194-y      | Persistence with biological drugs in patients treated in r   | L. Jacob; T. Ch | Jacob L       | Rheumatol Int   | 2019 | Disease Analyzer | Applied studies     | Pharmacoeconomics/-epidemiology      |
| 21 | 10.1016/j.jad.2019.03.060      | Association between induced abortion, spontaneous abor       | L. Jacob; C. Ge | Jacob L       | J Affect Disord | 2019 | Disease Analyzer | Applied studies     | General epidemiologic studies        |
| 22 | 10.3389/fmed.2021.684032       | Impact of the COVID-19 Pandemic on Consultations and         | M. S. Jördens   | Jördens MS    | Front Med (La   | 2021 | Disease Analyzer | Applied studies     | Health Services Research             |
| 23 | 10.1097/aog.0000000000000468   | Discontinuation of treatment using anticholinergic medi      | M. Kalder; K. F | Kalder M      | Obstet Gynec    | 2014 | Disease Analyzer | Applied studies     | Pharmacoeconomics/-epidemiology      |
| 24 | 10.1055/s-0034-1395539         | [Pregnancy after breast cancer in germany - results of a     | N. Kalousidou   | Kalousidou N  | Z Geburtshilfe  | 2015 | Disease Analyzer | Applied studies     | General epidemiologic studies        |
| 25 | 10.1515/jpem-2016-0171         | Prevalence of medically treated children with ADHD and       | T. M. Kapellen  | Kapellen TM   | J Pediatr Endo  | 2016 | Disease Analyzer | Applied studies     | General epidemiologic studies        |
| 26 | 10.1177/2050640620944098       | Non-alcoholic fatty liver disease increases the risk of inci | L. Kaps; C. Lab | Kaps L        | United Europe   | 2020 | Disease Analyzer | Applied studies     | General epidemiologic studies        |
| 27 | 10.3390/antibiotics10040455    | Prevalence of and Factors Associated with Antibiotic Pre     | W. V. Kern; K.  | Kern WV       | Antibiotics (Ba | 2021 | Disease Analyzer | Applied studies     | Pharmacoeconomics/-epidemiology      |
| 28 | 10.1055/s-0030-1249689         | Routinedaten aus hausärztlichen Arztinformationssystem       | M. Kersting; A  | Kersting M    | Das Gesundhe    | 2010 | MedVip           | Methodological stud | Generalizable research using EHR dat |
| 29 | 10.1055/s-0032-1314824         | Modellierung von Anforderungen an hausärztliche Routi        | M. Kersting; J. | Kersting M    | Gesundheitsw    | 2012 | BeoNet-Hannover  | Methodological stud | Generalizable research using EHR dat |
| 30 | 10.1038/s41533-022-00278-8     | Age- and gender-based comorbidity categories in gener        | S. J. Kim-Dorn  | Kim-Dorner S  | NPJ Prim Care   | 2022 | BeoNet-Hannover  | Applied studies     | General epidemiologic studies        |
| 31 | 10.1007/s13300-016-0177-8      | Microvascular Outcomes in Patients with Type 2 Diabete       | W. M. Kolacz    | Kolaczynski W | Diabetes Ther   | 2016 | Disease Analyzer | Applied studies     | Pharmacoeconomics/-epidemiology      |
| 32 | 10.1017/s1041610216000867      | Depression risk in patients with heart failure in primary    | M. Konrad; J.   | Konrad M      | International J | 2016 | Disease Analyzer | Applied studies     | General epidemiologic studies        |
| 33 | 10.5414/cp202591               | Treatment of depression in patients with cardiovascular      | M. Konrad; L.   | Konrad M      | Int J Clin Phar | 2016 | Disease Analyzer | Applied studies     | Pharmacoeconomics/-epidemiology      |
| 34 | 10.1016/j.jad.2020.05.074      | Increased prevalence of depression, anxiety, and adjust      | M. Konrad; K.   | Konrad M      | Journal of Affe | 2020 | Disease Analyzer | Applied studies     | General epidemiologic studies        |
| 35 | 10.1055/s-0029-1244827         | [Implementation of recommendations for the diagnosis         | K. Korb; E. Hu  | Korb K        | Deutsche Med    | 2010 | MedVip           | Applied studies     | Health services research             |
| 36 | 10.1016/j.pcd.2012.06.001      | Predictors for the initiation of a basal supported oral the  | K. Kostev; F. V | Kostev K      | Prim Care Dial  | 2012 | Disease Analyzer | Applied studies     | Pharmacoeconomics/-epidemiology      |
| 37 | 10.12968/jowc.2012.21.10.483   | Risk of diabetic foot ulceration during treatment with ins   | K. Kostev; F. V | Kostev K      | J Wound Care    | 2012 | Disease Analyzer | Applied studies     | Pharmacoeconomics/-epidemiology      |
| 38 | 10.1177/193229681300700319     | Resource Consumption and Costs of Treatment in Patien        | K. Kostev; F.-V | Kostev K      | Journal of Dial | 2013 | Disease Analyzer | Applied studies     | Pharmacoeconomics/-epidemiology      |
| 39 | 10.5414/cp201969               | Adherence in tamoxifen therapy after conversion to a re      | K. Kostev; U. N | Kostev K      | Int. Journal of | 2013 | Disease Analyzer | Applied studies     | Pharmacoeconomics/-epidemiology      |
| 40 | 10.5414/cp201912               | Frequency of hospitalizations prior to and after conversi    | K. Kostev; U. N | Kostev K      | Int J Clin Phar | 2013 | Disease Analyzer | Applied studies     | Health services research             |
| 41 | 10.1016/j.pcd.2013.02.001      | Influence of macro- and microvascular comorbidity on ti      | K. Kostev; W.   | Kostev K      | Primary Care I  | 2013 | Disease Analyzer | Applied studies     | Pharmacoeconomics/-epidemiology      |
| 42 | 10.1016/j.jval.2013.08.1371    | Risk of Psychiatric and Neurological Diseases in Patients    | K. Kostev; J. R | Kostev K      | Value in Healt  | 2013 | Disease Analyzer | Applied studies     | General epidemiologic studies        |
| 43 | 10.1177/1932296814532616       | Predictors of Insulin Initiation in Metformin and Sulfonyl   | K. Kostev; F.-V | Kostev K      | Journal of Dial | 2014 | Disease Analyzer | Applied studies     | Pharmacoeconomics/-epidemiology      |
| 44 | 10.1016/j.pcd.2013.10.001      | Predictors of hypoglycaemia in insulin-treated type 2 dia    | K. Kostev; F.-V | Kostev K      | Primary Care I  | 2014 | Disease Analyzer | Applied studies     | General epidemiologic studies        |
| 45 | 10.1016/j.pcd.2014.01.011      | Prevalence and risk factors of neuropathy in newly diagn     | K. Kostev; A. J | Kostev K      | Primary Care I  | 2014 | Disease Analyzer | Applied studies     | General epidemiologic studies        |
| 46 | 10.3205/000200                 | Which adverse effects influence the dropout rate in sele     | K. Kostev; J. R | Kostev K      | Ger Med Sci     | 2014 | Disease Analyzer | Applied studies     | Pharmacoeconomics/-epidemiology      |
| 47 | 10.3205/000188                 | Physicians' influence on breast cancer patient complianc     | K. Kostev; L. V | Kostev K      | Ger Med Sci     | 2014 | Disease Analyzer | Applied studies     | Pharmacoeconomics/-epidemiology      |
| 48 | 10.2147/dms0.S76855            | Glycemic control after initiating basal insulin therapy in   | K. Kostev; F. V | Kostev K      | Diabetes Met    | 2015 | Disease Analyzer | Applied studies     | Pharmacoeconomics/-epidemiology      |
| 49 | 10.3205/000205                 | Risk of hypoglycaemia in type 2 diabetes patients under      | K. Kostev; F. V | Kostev K      | Ger Med Sci     | 2015 | Disease Analyzer | Applied studies     | General epidemiologic studies        |
| 50 | 10.1016/j.pcd.2014.04.001      | Effects of selected antidiabetics on weight loss--a retros   | K. Kostev; J. R | Kostev K      | Prim Care Dial  | 2015 | Disease Analyzer | Applied studies     | Pharmacoeconomics/-epidemiology      |
| 51 | 10.1185/03007995.2015.1034095  | Persistence with opioid treatment in Germany in patient      | K. Kostev; F. V | Kostev K      | Current Medic   | 2015 | Disease Analyzer | Applied studies     | Pharmacoeconomics/-epidemiology      |

|    |                               |                                                             |                                 |                 |      |                  |                     |                                 |
|----|-------------------------------|-------------------------------------------------------------|---------------------------------|-----------------|------|------------------|---------------------|---------------------------------|
| 1  |                               |                                                             |                                 |                 |      |                  |                     |                                 |
| 2  | 10.1097/xce.000000000000098   | Prevalence of high-risk cardiovascular patients with the    | K. Kostev; K. Kostev K          | Cardiovasc En   | 2017 | Disease Analyzer | Applied studies     | General epidemiologic studies   |
| 3  | 10.1177/1932296816688011      | Changes in Glycemic Control and Body Weight After Init      | K. Kostev; S. P Kostev K        | Journal of Dia  | 2017 | Disease Analyzer | Applied studies     | Pharmacoeconomics/-epidemiology |
| 4  | 10.1177/1932296817710477      | Prescription Patterns and Disease Control in Type 2 Diab    | K. Kostev; T. P Kostev K        | J Diabetes Sci  | 2018 | Disease Analyzer | Applied studies     | Pharmacoeconomics/-epidemiology |
| 5  | 10.1177/1932296819835196      | Time to Insulin Initiation in Type 2 Diabetes Patients in 2 | K. Kostev; S. G Kostev K        | Journal of Dia  | 2019 | Disease Analyzer | Applied studies     | Pharmacoeconomics/-epidemiology |
| 6  | 10.5414/cp203851              | Prevalence and associated factors of referrals to hospita   | K. Kostev; M. Kostev K          | Int. Journal of | 2021 | Disease Analyzer | Applied studies     | General epidemiologic studies   |
| 7  | 10.1007/s00787-021-01924-1    | Increase in depression and anxiety disorder diagnoses d     | K. Kostev; K. V Kostev K        | Eur Child Adol  | 2021 | Disease Analyzer | Applied studies     | General epidemiologic studies   |
| 8  | 10.1016/j.yebeh.2021.108211   | Predicting the risk of stroke in patients with late-onset e | K. Kostev; T. V Kostev K        | Epilepsy Beha   | 2021 | Disease Analyzer | Applied studies     | General epidemiologic studies   |
| 9  | 10.1093/ofid/ofac333          | Prevalence of and Factors Associated With Post-Coronav      | K. Kostev; L. S Kostev K        | Open Forum I    | 2022 | Disease Analyzer | Applied studies     | Pharmacoeconomics/-epidemiology |
| 10 | 10.1080/00325481.2022.2015220 | Association between ivy leaves dry extract EA 575 presc     | K. Kostev; A. V Kostev K        | Postgrad Med    | 2022 | Disease Analyzer | Applied studies     | Pharmacoeconomics/-epidemiology |
| 11 | 10.2337/dc14-0977             | Are Sulfonylurea and Insulin Therapies Associated With      | B. Kowall; W. Kowall B          | Diabetes Care   | 2014 | Disease Analyzer | Applied studies     | Pharmacoeconomics/-epidemiology |
| 12 | 10.1016/j.diabres.2021.109002 | Effects of the COVID-19 lockdown on primary health car      | B. Kowall; K. Kowall B          | Diabetes Res (  | 2021 | Disease Analyzer | Applied studies     | Health Services Research        |
| 13 | 10.1111/dme.14852             | Effects of the COVID-19 pandemic on clinically diagnose     | B. Kowall; K. Kowall B          | Diabet Med      | 2022 | Disease Analyzer | Applied studies     | General epidemiologic studies   |
| 14 | 10.1371/journal.pone.0174584  | Antibiotic prescribing for acute lower respiratory tract in | E. M. Kraus; S. Kraus EM        | PLoS ONE [Ele   | 2017 | CONTENT          | Applied studies     | Pharmacoeconomics/-epidemiology |
| 15 | 10.5414/cp201653              | Micro- and macrovascular outcomes in Type 2 diabetic p      | S. Kress; K. Ko Kress S         | Int. Journal of | 2012 | Disease Analyzer | Applied studies     | Pharmacoeconomics/-epidemiology |
| 16 | 10.1016/j.zefq.2008.05.001    | Diagnosehäufigkeiten und Verordnungen bei Schwindel         | C. Kruschinski; Kruschinski C   | Zeitschrift fur | 2008 | MedVip           | Applied studies     | Health services research        |
| 17 | 10.1055/s-0029-1246176        | [Hospital referrals from the general practitioner's perspe  | T. Kuhlein; G. Kuhlein T        | Gesundheitsw    | 2011 | CONTENT          | Applied studies     | Health services research        |
| 18 | 10.1517/14656566.2012.638284  | Benzodiazepine discontinuation with prolonged-release       | D. Kunz; S. Bin Kunz D          | Expert Opin P   | 2012 | Disease Analyzer | Applied studies     | Pharmacoeconomics/-epidemiology |
| 19 | 10.3389/fneur.2021.637176     | Clinical Features Observed in General Practice Associate    | M. J. Kwasny; Kwasny MJ         | Front Neurol    | 2021 | Disease Analyzer | Applied studies     | Health Services Research        |
| 20 | 10.1007/s00198-014-2810-6     | Differences in persistency with teriparatide in patients w  | I. Kyvernitakis; Kyvernitakis I | Osteoporosis    | 2014 | Disease Analyzer | Applied studies     | Pharmacoeconomics/-epidemiology |
| 21 | 10.3109/13697137.2015.1037267 | Discontinuation rates of menopausal hormone therapy a       | I. Kyvernitakis; Kyvernitakis I | Climacteric     | 2015 | Disease Analyzer | Applied studies     | Pharmacoeconomics/-epidemiology |
| 22 | 10.3109/13697137.2015.1081164 | Persistency with estrogen replacement therapy among th      | I. Kyvernitakis; Kyvernitakis I | Climacteric     | 2015 | Disease Analyzer | Applied studies     | Pharmacoeconomics/-epidemiology |
| 23 | 10.1007/s00198-016-3714-4     | The impact of depot medroxyprogesterone acetate on fr       | I. Kyvernitakis; Kyvernitakis I | Osteoporos In   | 2017 | Disease Analyzer | Applied studies     | Pharmacoeconomics/-epidemiology |
| 24 | 10.1007/s00198-018-4642-2     | The tamoxifen paradox-influence of adjuvant tamoxifen       | I. Kyvernitakis; Kyvernitakis I | Osteoporos In   | 2018 | Disease Analyzer | Applied studies     | Pharmacoeconomics/-epidemiology |
| 25 | 10.1007/s00198-020-05437-6    | Effect of progestogen-only contraception on premenopa       | I. Kyvernitakis; Kyvernitakis I | Osteoporos In   | 2020 | Disease Analyzer | Applied studies     | Pharmacoeconomics/-epidemiology |
| 26 | 10.1097/md.0000000000023436   | Proton pump inhibitor use is associated with a variety of   | C. Labenz; K. Labenz C          | Medicine        | 2020 | Disease Analyzer | Applied studies     | Pharmacoeconomics/-epidemiology |
| 27 | 10.1111/apt.16008             | Proton pump inhibitors increase risk of bone fractures in   | C. Labenz; M. Labenz C          | Aliment Pharm   | 2020 | Disease Analyzer | Applied studies     | Pharmacoeconomics/-epidemiology |
| 28 | 10.1002/ueg2.12124            | Impact of thyroid disorders on the incidence of non-alco    | C. Labenz; K. Labenz C          | United Europe   | 2021 | Disease Analyzer | Applied studies     | General epidemiologic studies   |
| 29 | 10.1007/s10620-020-06644-1    | Incident Dementia in Elderly Patients with Nonalcoholic     | C. Labenz; K. Labenz C          | Dig Dis Sci     | 2021 | Disease Analyzer | Applied studies     | General epidemiologic studies   |
| 30 | 10.1055/a-1378-4679           | Impact of Non-Alcoholic Fatty Liver Disease on Metabol      | C. Labenz; K. Labenz C          | Exp Clin Endoc  | 2022 | Disease Analyzer | Applied studies     | General epidemiologic studies   |
| 31 | 10.1055/a-1676-4822           | Prescription rates of common medications in patients w      | C. Labenz; K. Labenz C          | Z Gastroenter   | 2022 | Disease Analyzer | Applied studies     | Pharmacoeconomics/-epidemiology |
| 32 | 10.1016/j.yebeh.2020.107705   | Manufacturer switch of anti-seizure drugs may not incre     | J. D. Lang; K. Lang JD          | Epilepsy Beha   | 2021 | Disease Analyzer | Applied studies     | Pharmacoeconomics/-epidemiology |
| 33 | 10.14236/jhi.v13i4.604        | The CONTENT project: a problem-oriented, episode-base       | G. Laux; T. Ko Laux G           | Informatics in  | 2005 | CONTENT          | Methodological stud | Database-specific research      |
| 34 | 10.1055/s-2007-976517         | [Detailed data collection regarding the utilization of med  | G. Laux; T. Ro Laux G           | Gesundheitsw    | 2007 | CONTENT          | Applied studies     | Health services research        |
| 35 | 10.1186/1472-6963-8-14        | Co- and multimorbidity patterns in primary care based o     | G. Laux; T. Ku Laux G           | BMC Health St   | 2008 | CONTENT          | Applied studies     | Health services research        |
| 36 | 10.1007/s00063-009-1028-4     | [Antihypertensive pharmacotherapy of patients in prima      | G. Laux; J. Sz Laux G           | Medizinische    | 2009 | CONTENT          | Applied studies     | Pharmacoeconomics/-epidemiology |
| 37 | 10.1016/j.zefq.2010.08.005    | [Using routine data for quality of care assessments: a cri  | G. Laux; M. Ne Laux G           | Zeitschrift fur | 2011 | CONTENT          | Applied studies     | Health services research        |
| 38 | 10.1186/s12875-016-0543-7     | Prescribing differences in family practice for diabetic pat | G. Laux; S. Be Laux G           | BMC Family P    | 2016 | CONTENT          | Applied studies     | Pharmacoeconomics/-epidemiology |
| 39 | 10.1371/journal.pone.0163519  | Differences between Practice Patterns of Conventional a     | G. Laux; B. Mu Laux G           | PLoS ONE [Ele   | 2016 | CONTENT          | Applied studies     | Pharmacoeconomics/-epidemiology |
| 40 | 10.1111/ejh.12776             | Epidemiology of iron deficiency anaemia in four Europe      | M. Levi; M. Ro Levi M           | European Jour   | 2016 | Disease Analyzer | Applied studies     | General epidemiologic studies   |
| 41 | 10.1055/s-0043-108544         | [Health Science Research with Primary Care Routine Dat      | H. Lingner; I. Lingner H        | Gesundheitsw    | 2018 | BeoNet-Hannover  | Methodological stud | Database-specific research      |
| 42 | 10.1016/j.rmed.2020.106242    | Oral corticosteroid prescription for asthma by general p    | M. Lommatzsch; Lommatzsch M     | Respiratory M   | 2021 | Disease Analyzer | Applied studies     | Pharmacoeconomics/-epidemiology |
| 43 | 10.1136/bmjdr-2021-002243     | Variables associated with increased incidence of non-alc    | S. H. Loosen; Loosen S          | BMJ Open Dia    | 2021 | Disease Analyzer | Applied studies     | General epidemiologic studies   |
| 44 | 10.3390/jcm10245911           | Incidence of Cancer in Patients with Irritable Bowl Syndr   | S. H. Loosen; Loosen S          | J Clin Med      | 2021 | Disease Analyzer | Applied studies     | General epidemiologic studies   |
| 45 | 10.1007/s00432-021-03867-1    | Low blood levels of high-density lipoprotein (HDL) chole    | S. H. Loosen; Loosen S          | J Cancer Res C  | 2021 | Disease Analyzer | Applied studies     | General epidemiologic studies   |
| 46 | 10.1007/s00384-021-03937-3    | Diverticular disease is associated with an increased inci   | S. H. Loosen; Loosen S          | Int J Colorect  | 2021 | Disease Analyzer | Applied studies     | General epidemiologic studies   |
| 47 | 10.1055/a-1482-9236           | Non-alcoholic fatty liver disease (NAFLD) is associated w   | S. H. Loosen; Loosen S          | Z Gastroenter   | 2021 | Disease Analyzer | Applied studies     | General epidemiologic studies   |
| 48 | 10.1097/meg.0000000000002377  | An elevated FIB-4 score is not associated with cardiovas    | S. Loosen; M. Loosen S          | Eur J Gastroer  | 2022 | Disease Analyzer | Applied studies     | General epidemiologic studies   |
| 49 | 10.3390/vaccines10040566      | Factors Associated with Non-Severe Adverse Reactions a      | S. H. Loosen; Loosen S          | Vaccines (Bas   | 2022 | Disease Analyzer | Applied studies     | General epidemiologic studies   |
| 50 | 10.1007/s15010-022-01784-0    | Obesity and lipid metabolism disorders determine the ri     | S. H. Loosen; Loosen S          | Infection       | 2022 | Disease Analyzer | Applied studies     | General epidemiologic studies   |
| 51 | 10.1016/j.ejca.2022.03.010    | An elevated FIB-4 score is associated with an increased     | S. H. Loosen; Loosen S          | Eur J Cancer    | 2022 | Disease Analyzer | Applied studies     | General epidemiologic studies   |

|    |                                  |                                                             |                              |                  |      |                  |                 |                                      |  |
|----|----------------------------------|-------------------------------------------------------------|------------------------------|------------------|------|------------------|-----------------|--------------------------------------|--|
| 1  |                                  |                                                             |                              |                  |      |                  |                 |                                      |  |
| 2  | 10.1186/s12876-022-02118-y       | Overlap between irritable bowel syndrome and common         | S. H. Loosen; Loosen S       | BMC Gastroen     | 2022 | Disease Analyzer | Applied studies | General epidemiologic studies        |  |
| 3  | 10.1038/s41598-022-06618-5       | The spectrum of comorbidities at the initial diagnosis of   | S. H. Loosen; Loosen S       | Sci Rep          | 2022 | Disease Analyzer | Applied studies | General epidemiologic studies        |  |
| 4  | 10.3390/cancers14040931          | Overweight and Obesity Determine the Risk for Gastroin      | S. H. Loosen; Loosen S       | Cancers (Base    | 2022 | Disease Analyzer | Applied studies | General epidemiologic studies        |  |
| 5  | 10.1007/s00296-015-3348-4        | Treatment persistence among patients with rheumatoid        | R. Lyu; M. Go Lyu R          | Rheumatol Int    | 2016 | Disease Analyzer | Applied studies | Pharmacoeconomics/-epidemiology      |  |
| 6  | 10.5414/CP202003                 | Drug-disease interaction in elderly patients in family pra  | P. Mand; K. Re Mand P        | International J  | 2014 | MedVip           | Applied studies | Pharmacoeconomics/-epidemiology      |  |
| 7  | 10.1080/00325481.2020.1751497    | Reduced antibiotic use after initial treatment of acute re  | D. Martin; M. Martin D       | Postgrad Med     | 2020 | Disease Analyzer | Applied studies | Pharmacoeconomics/-epidemiology      |  |
| 8  | 10.5414/cpp48173                 | Relation of the first hypertension-associated event with    | J. Mathes; K. Mathes J       | Int J Clin Phari | 2010 | Disease Analyzer | Applied studies | General epidemiologic studies        |  |
| 9  | 10.1186/s13223-015-0085-x        | Allergy immunotherapy prescribing trends for grass poll     | A. L. McDonell McDonell AL   | Allergy Asthm    | 2015 | Disease Analyzer | Applied studies | Pharmacoeconomics/-epidemiology      |  |
| 10 | 10.1007/s15006-017-0341-8        | Schlaganfallprophylaxe bei Vorhofflimmern in Deutschla      | U. Mergenthaler Mergenthaler | MMW - Fortsc     | 2017 | Disease Analyzer | Applied studies | Pharmacoeconomics/-epidemiology      |  |
| 11 | 10.1007/s40261-018-0684-7        | Indications for Systemic Fluoroquinolone Therapy in Eur     | D. R. Morales; Morales DR    | Clinical Drug I  | 2018 | Disease Analyzer | Applied studies | Pharmacoeconomics/-epidemiology      |  |
| 12 | 10.1007/s40744-016-0033-3        | Disease Control, Health Resource Use, Healthcare Costs      | R. Morlock; P. Morlock R     | Rheumatol Th     | 2016 | Disease Analyzer | Applied studies | Health Services Research             |  |
| 13 | 10.1016/j.jpsychires.2021.10.033 | Age effects on treatment patterns in 138,097 patients w     | H. Mössinger; Mössinger H    | J Psychiatr Res  | 2021 | Disease Analyzer | Applied studies | Pharmacoeconomics/-epidemiology      |  |
| 14 | 10.1016/j.yebeh.2021.107833      | The impact of the coronavirus disease (COVID-19) pande      | T. M. Mueller; Mueller TM    | Epilepsy &am     | 2021 | Disease Analyzer | Applied studies | Pharmacoeconomics/-epidemiology      |  |
| 15 | 10.1024/0301-1526/a000097        | Increased health care utilization by patients with periph   | U. Muller-Buhl Muller-Buhl U | Vasa             | 2011 | CONTENT          | Applied studies | Health services research             |  |
| 16 | 10.1024/0301-1526/a000222        | Varicose veins are a risk factor for deep venous thrombo    | U. Muller-Buhl Muller-Buhl U | Vasa             | 2012 | CONTENT          | Applied studies | General epidemiologic studies        |  |
| 17 | 10.1055/s-0037-1621806           | Prävalenz, lokale Komplikationen und Risikofaktoren der     | U. Müller-Bühl Muller-Buhl U | Phlebologie      | 2012 | CONTENT          | Applied studies | General epidemiologic studies        |  |
| 18 | 10.1111/j.1742-481X.2012.00942.x | Expenditure of chronic venous leg ulcer management in       | U. Muller-Buhl Muller-Buhl U | International V  | 2013 | CONTENT          | Applied studies | General epidemiologic studies        |  |
| 19 | 10.1080/02770903.2021.1878532    | German regional variation of acute and high oral cortico    | C. Nan; O. Sch Nan C         | J Asthma         | 2022 | Disease Analyzer | Applied studies | Pharmacoeconomics/-epidemiology      |  |
| 20 | 10.1007/s12325-016-0346-1        | Comorbidity Burden in Trial-Aligned Patients with Estab     | F. Nyberg; L. Nyberg F       | Adv Ther         | 2016 | Disease Analyzer | Applied studies | General epidemiologic studies        |  |
| 21 | 10.1016/j.zefq.2018.11.005       | [Estimating the incidence of venous thromboembolism (       | C. Ohlmeier; Ohlmeier C      | Z Evid Fortbild  | 2018 | Disease Analyzer | Applied studies | General epidemiologic studies        |  |
| 22 | 10.1080/00016489.2018.1506153    | Current healthcare pathways in the treatment of rhinosi     | J. J.-H. Park; Park JJH      | Acta Oto-Lary    | 2018 | Disease Analyzer | Applied studies | General epidemiologic studies        |  |
| 23 | 10.4193/Rhin18.055               | Medication use in patients with chronic rhinosinusitis in   | J. J. H. Park; Park JJH      | Rhinology        | 2019 | Disease Analyzer | Applied studies | Pharmacoeconomics/-epidemiology      |  |
| 24 | 10.1016/j.jpeds.2008.07.050      | Antiemetic medications in children with presumed infec      | N. Pfeil; U. Pfeil N         | J Pediatr        | 2008 | Disease Analyzer | Applied studies | Pharmacoeconomics/-epidemiology      |  |
| 25 | 10.5414/cpp48761                 | Different persistence on initial basal supported oral ther  | M. Pfohl; F. Pfohl M         | Int J Clin Phari | 2010 | Disease Analyzer | Applied studies | Pharmacoeconomics/-epidemiology      |  |
| 26 | 10.1002/pds.4575                 | Anticholinergic and sedative medications and the risk of    | A. Phillips; R. Phillips A   | Pharmacoepic     | 2018 | CONTENT          | Applied studies | Pharmacoeconomics/-epidemiology      |  |
| 27 | 10.1016/j.pcd.2012.02.004        | Amputation rate and risk factors in type 2 patients with    | S. Pscherer; F. Pscherer S   | Primary Care I   | 2012 | Disease Analyzer | Applied studies | General epidemiologic studies        |  |
| 28 | 10.1016/j.pcd.2015.01.011        | Treatment persistence after initiating basal insulin in typ | S. Pscherer; F. Pscherer S   | Primary Care I   | 2015 | Disease Analyzer | Applied studies | Pharmacoeconomics/-epidemiology      |  |
| 29 | 10.2147/dms0.S101370             | Fracture risk in patients with type 2 diabetes under diffe  | S. Pscherer; K. Pscherer S   | Diabetes Meta    | 2016 | Disease Analyzer | Applied studies | Pharmacoeconomics/-epidemiology      |  |
| 30 | 10.1177/1932296816661349         | Treatment Outcomes and Tolerability Following Initiatio     | Q. Qiao; K. Qiao Q           | Journal of Dial  | 2016 | Disease Analyzer | Applied studies | Pharmacoeconomics/-epidemiology      |  |
| 31 | 10.1007/s41030-020-00139-0       | Development and Validation of a Method to Estimate CC       | J. K. Quint; C. Quint JK     | Pulm Ther        | 2021 | Disease Analyzer | Applied studies | Generalizable research using EHR dat |  |
| 32 | 10.1055/s-2007-972562            | Prescription of Insulin Glargine in Primary Care Practices  | W. Rathmann; Rathmann W      | Experimental     | 2007 | Disease Analyzer | Applied studies | Pharmacoeconomics/-epidemiology      |  |
| 33 | 10.1111/dom.12035                | Lower incidence of recorded cardiovascular outcomes in      | W. Rathmann; Rathmann W      | Diabetes, Obe    | 2012 | Disease Analyzer | Applied studies | Pharmacoeconomics/-epidemiology      |  |
| 34 | 10.1177/193229681300700527       | Different injection frequencies of basal insulins in type 2 | W. Rathmann; Rathmann W      | J Diabetes Sci   | 2013 | Disease Analyzer | Applied studies | Pharmacoeconomics/-epidemiology      |  |
| 35 | 10.1055/s-0033-1363684           | Macro- and Microvascular Outcomes in Patients with Ty       | W. Rathmann; Rathmann W      | Experimental     | 2014 | Disease Analyzer | Applied studies | Pharmacoeconomics/-epidemiology      |  |
| 36 | 10.1016/j.jdiacomp.2015.05.007   | Fracture risk in patients with newly diagnosed type 2 dia   | W. Rathmann; Rathmann W      | J Diabetes Cor   | 2015 | Disease Analyzer | Applied studies | General epidemiologic studies        |  |
| 37 | 10.5414/cp202906                 | Regional differences in insulin therapy regimens in five E  | W. Rathmann; Rathmann W      | Int J Clin Phari | 2017 | Disease Analyzer | Applied studies | Pharmacoeconomics/-epidemiology      |  |
| 38 | 10.1016/j.jdiacomp.2017.01.012   | Association of dipeptidyl peptidase 4 inhibitors with risk  | W. Rathmann; Rathmann W      | J Diabetes Cor   | 2017 | Disease Analyzer | Applied studies | Pharmacoeconomics/-epidemiology      |  |
| 39 | 10.5414/cp203320                 | Basic characteristics and representativeness of the Germ    | W. Rathmann; Rathmann W      | Int. Journal of  | 2018 | Disease Analyzer | Applied studies | Validation studies                   |  |
| 40 | 10.1111/1753-0407.12823          | Association of characteristics of people with type 2 diab   | W. Rathmann; Rathmann W      | Journal of Dial  | 2018 | Disease Analyzer | Applied studies | General epidemiologic studies        |  |
| 41 | 10.1016/j.psychres.2017.12.091   | Increased depression symptom score in newly diagnose        | W. Rathmann; Rathmann W      | Psychiatry Res   | 2018 | Disease Analyzer | Applied studies | General epidemiologic studies        |  |
| 42 | 10.1080/00325481.2018.1421842    | Changes in patient characteristics, glucose lowering trea   | W. Rathmann; Rathmann W      | Postgraduate     | 2018 | Disease Analyzer | Applied studies | Pharmacoeconomics/-epidemiology      |  |
| 43 | 10.1007/s00125-022-05670-0       | Incidence of newly diagnosed diabetes after Covid-19        | W. Rathmann; Rathmann W      | Diabetologia     | 2022 | Disease Analyzer | Applied studies | General epidemiologic studies        |  |
| 44 | 10.5414/cp202230                 | Association of time-to-levodopa with initial Parkinsonian   | J. P. Reese; H. Reese JP     | Int J Clin Phari | 2015 | Disease Analyzer | Applied studies | Pharmacoeconomics/-epidemiology      |  |
| 45 | 10.1002/pds.2250                 | How frequently are contraindicated or warned against c      | U. Richarz; A. Richarz U     | Pharmacoepic     | 2012 | Disease Analyzer | Applied studies | Health services research             |  |
| 46 | 10.3390/cancers13092027          | Cancer Patients Have an Increased Incidence of Dement       | C. Roderburg; Roderburg C    | Cancers (Base    | 2021 | Disease Analyzer | Applied studies | General epidemiologic studies        |  |
| 47 | 10.1097/meg.0000000000002234     | Nonalcoholic fatty liver disease is associated with a high  | C. Roderburg; Roderburg C    | Eur J Gastroen   | 2022 | Disease Analyzer | Applied studies | General epidemiologic studies        |  |
| 48 | 10.1007/s00432-022-03998-z       | Antibiotic therapy is associated with an increased incide   | C. Roderburg; Roderburg C    | J Cancer Res C   | 2022 | Disease Analyzer | Applied studies | Pharmacoeconomics/-epidemiology      |  |
| 49 | 10.1016/j.jpsychores.2010.05.003 | Diagnosing somatisation disorder (P75) in routine gener     | R. Schaefer; Schaefer R      | Journal of Psy   | 2010 | CONTENT          | Applied studies | General epidemiologic studies        |  |
| 50 | 19742279 (PMID)                  | Psychosocial determinants for frequent primary health c     | M. Scherer; W. Scheerer MF   | GMS Psycho-S     | 2008 | Disease Analyzer | Applied studies | Pharmacoeconomics/-epidemiology      |  |
| 51 | 10.2147/dms0.S116243             | Changes in HbA1c, body weight, and systolic blood press     | M. F. Scheerer Scheerer MF   | Diabetes Meta    | 2016 | MedVip           | Applied studies | Health services research             |  |

|    |                                 |                                                              |                   |                |                  |      |                  |                     |                                 |
|----|---------------------------------|--------------------------------------------------------------|-------------------|----------------|------------------|------|------------------|---------------------|---------------------------------|
| 1  |                                 |                                                              |                   |                |                  |      |                  |                     |                                 |
| 2  | 10.20524/aog.2016.0009          | Do patients with lactose intolerance exhibit more frequ      | R. Schiffner; K   | Schiffner R    | Ann Gastroen     | 2016 | Disease Analyzer | Applied studies     | General epidemiologic studies   |
| 3  | 10.1080/03007995.2020.1815001   | Patient characteristics of insulin lispro 200 units/mL use   | N. C. Schloot;    | Schloot NC     | Current Medic    | 2020 | Disease Analyzer | Applied studies     | Pharmacoeconomics/-epidemiology |
| 4  | 10.3390/jcm11082214             | An Elevated FIB-4 Score Is Associated with an Increased      | D. Schöler; K.    | Schöler D      | J Clin Med       | 2022 | Disease Analyzer | Applied studies     | General epidemiologic studies   |
| 5  | 10.1016/j.yebeh.2020.107210     | Usage of antiepileptic drugs in different diseases in Germ   | J. Scholten; H.   | Scholten J     | Epilepsy &am     | 2020 | Disease Analyzer | Applied studies     | Pharmacoeconomics/-epidemiology |
| 6  | 10.5414/cpp40317                | Lipid-lowering therapy: do hospitals influence the prescri   | D. Schroder-B     | Schroder-Berr  | International J  | 2002 | Disease Analyzer | Applied studies     | Pharmacoeconomics/-epidemiology |
| 7  | 10.5414/cpp42581                | Off-label use of proton pump inhibitors and b-blockers in    | D. Schröder-B     | Schroder-Berr  | Int. Journal of  | 2004 | Disease Analyzer | Applied studies     | Pharmacoeconomics/-epidemiology |
| 8  | 10.1177/0145561320930568        | Incidence of Inner Ear Disorders in Various Forms of Acu     | D. U. Seidel; S   | Seidel DU      | Ear Nose Thro    | 2021 | Disease Analyzer | Applied studies     | General epidemiologic studies   |
| 9  | 10.1055/s-0030-1249693          | [Secondary data for budget impact analyses]                  | J. Sindern; D.    | Sindern J      | Gesundheitsw     | 2010 | Disease Analyzer | Applied studies     | Pharmacoeconomics/-epidemiology |
| 10 | 10.1016/j.clinthera.2005.02.012 | Equipotent doses of transdermal fentanyl and transderm       | R. Sittl; R. Lika | Sittl R        | Clin Ther        | 2005 | Disease Analyzer | Applied studies     | Pharmacoeconomics/-epidemiology |
| 11 | 10.1016/j.clinthera.2005.06.024 | Changes in the prescribed daily doses of transdermal fen     | R. Sittl; M. Nu   | Sittl R        | Clin Ther        | 2005 | Disease Analyzer | Applied studies     | Pharmacoeconomics/-epidemiology |
| 12 | 10.1016/j.clinthera.2006.08.002 | Patterns of dosage changes with transdermal buprenorp        | R. Sittl; M. Nu   | Sittl R        | Clin Ther        | 2006 | Disease Analyzer | Applied studies     | Pharmacoeconomics/-epidemiology |
| 13 | 10.1055/s-2007-993181           | [Home visits in German general practice: findings from r     | E. A. Snijder; N  | Snijder EA     | Gesundheitsw     | 2007 | MedVip           | Applied studies     | Health services research        |
| 14 | 10.1055/s-0033-1349609          | Verwendung von Off-Label-Medikamenten bei ambulanz           | D. Sonntag; D.    | Sonntag D      | DMW - Deuts      | 2013 | Disease Analyzer | Applied studies     | Pharmacoeconomics/-epidemiology |
| 15 | 10.1007/s00415-020-10379-4      | Anti-seizure medication is not associated with an increas    | J. Stritzelberg   | Stritzelberger | J Neurol         | 2021 | Disease Analyzer | Applied studies     | Pharmacoeconomics/-epidemiology |
| 16 | 10.1007/s00198-020-05344-w      | Incidence of fractures in patients with type 1 diabetes m    | U. Stumpf; P.     | Stumpf U       | Osteoporosis     | 2020 | Disease Analyzer | Applied studies     | General epidemiologic studies   |
| 17 | 10.1016/j.jbo.2020.100292       | Influence of chemotherapy and endocrine treatment on         | U. Stumpf; K.     | Stumpf U       | J Bone Oncol     | 2020 | Disease Analyzer | Applied studies     | Pharmacoeconomics/-epidemiology |
| 18 | 10.1007/s00432-019-03022-x      | Increased risk for cancer after stroke at a young age: eti   | C. Tanislav; C.   | Tanislav C     | J Cancer Res C   | 2019 | Disease Analyzer | Applied studies     | General epidemiologic studies   |
| 19 | 10.1159/000503562               | Late Detection of Atrial Fibrillation after Stroke: Implicat | C. Tanislav; K.   | Tanislav C     | European Neu     | 2019 | Disease Analyzer | Applied studies     | General epidemiologic studies   |
| 20 | 10.1007/s00198-020-05535-5      | Factors associated with fracture after stroke and TIA: a l   | C. Tanislav; K.   | Tanislav C     | Osteoporosis     | 2020 | Disease Analyzer | Applied studies     | General epidemiologic studies   |
| 21 | 10.1016/j.puhe.2021.12.006      | Investigation of the prevalence of non-COVID-19 infectio     | C. Tanislav; K.   | Tanislav C     | Public Health    | 2022 | Disease Analyzer | Applied studies     | General epidemiologic studies   |
| 22 | 10.1016/j.jad.2021.01.002       | Association between skin disorders and depression in chi     | F. Teichgräber    | Teichgräber F  | J Affect Disord  | 2021 | Disease Analyzer | Applied studies     | General epidemiologic studies   |
| 23 | 10.1007/BF03261960              | Safety assessment of an anti-obesity drug (sibutramine)      | J. E. Tyczynski   | Tyczynski JE   | Drug Safety      | 2012 | Disease Analyzer | Applied studies     | Pharmacoeconomics/-epidemiology |
| 24 | 10.1111/dom.13977               | Changes in the utilization of blood glucose test strips am   | L. van den Bo     | van den Boon   | Diabetes, Obe    | 2020 | Disease Analyzer | Applied studies     | Pharmacoeconomics/-epidemiology |
| 25 | 10.1016/j.pcd.2020.09.005       | Prevalence of urinary system, pelvic organ, and genital t    | L. van den Bo     | van den Boon   | Prim Care Dial   | 2021 | Disease Analyzer | Applied studies     | General epidemiologic studies   |
| 26 | 10.1177/1932296820965261        | Multimorbidity Among Adult Outpatients With Type 1 Di        | L. van den Bo     | van den Boon   | J Diabetes Sci   | 2022 | Disease Analyzer | Applied studies     | General epidemiologic studies   |
| 27 | 10.1186/1471-2458-11-509        | Drug utilization patterns and reported health status in e    | A. Volodina; T    | Volodina A     | BMC Public He    | 2011 | Disease Analyzer | Applied studies     | Pharmacoeconomics/-epidemiology |
| 28 | 10.5414/cp201665                | A retrospective database analysis on persistence with in     | T. Voshaar; K.    | Voshaar T      | Int J Clin Pharm | 2012 | Disease Analyzer | Applied studies     | Pharmacoeconomics/-epidemiology |
| 29 | 10.1080/00325481.2018.1442090   | Early insights into the characteristics and evolution of cli | R. Wachter; D.    | Wachter R      | Postgraduate     | 2018 | Disease Analyzer | Applied studies     | Pharmacoeconomics/-epidemiology |
| 30 | 10.1002/ehf2.12768              | Heart failure signs and symptoms, hospital referrals, and    | R. Wachter; S.    | Wachter R      | ESC heart fail   | 2020 | Disease Analyzer | Applied studies     | Pharmacoeconomics/-epidemiology |
| 31 | 10.5414/cp201284                | Antihypertensive treatment and risk of dementia: a retr      | G. Wagner; A.     | Wagner G       | Int. Journal of  | 2012 | Disease Analyzer | Applied studies     | General epidemiologic studies   |
| 32 | 10.5414/cp202040                | Impact of comorbidities on the treatment of atopic derm      | A. Werner-Bu      | Werner-Busse   | Int. Journal of  | 2014 | Disease Analyzer | Applied studies     | General epidemiologic studies   |
| 33 | 10.1177/1932296817691304        | Risk of Nonfatal Stroke in Type 2 Diabetes Mellitus Patie    | S. Wiefarn; C.    | Wiefarn S      | J Diabetes Sci   | 2017 | Disease Analyzer | Applied studies     | Health Services Research        |
| 34 | 10.1055/s-0043-104267           | Einfluss des Disease-Management-Programms auf den H          | S. Wiefarn; K.    | Wiefarn S      | DMW - Deuts      | 2017 | Disease Analyzer | Applied studies     | Pharmacoeconomics/-epidemiology |
| 35 | 10.1111/ddg.12089               | Prevalence and treatment profile of patients with grass      | M. Worm; H.       | Worm M         | JDDG: Journal    | 2013 | Disease Analyzer | Applied studies     | General epidemiologic studies   |
| 36 | 10.1186/s12931-021-01701-3      | Prevalence of overuse of short-acting beta-2 agonists (S     | H. Worth; C.-F    | Worth H        | Respiratory Re   | 2021 | Disease Analyzer | Applied studies     | Pharmacoeconomics/-epidemiology |
| 37 | 10.1016/j.clinthera.2007.02.012 | Antidiabetic prescriptions and glycemic control in Germ      | N. Yurgin; K. S   | Yurgin N       | Clin Ther        | 2007 | Disease Analyzer | Applied studies     | Pharmacoeconomics/-epidemiology |
| 38 | 10.1016/j.jpap.2013.04.003      | The prescribing of contraceptives for adolescents in Ger     | M. Ziller; A. N   | Ziller M       | J Pediatr Adol   | 2013 | Disease Analyzer | Applied studies     | Pharmacoeconomics/-epidemiology |
| 39 | 10.1007/s00404-013-2983-9       | Risk of venous thrombosis in users of hormonal contrace      | M. Ziller; V. Z   | Ziller M       | Arch Gynecol     | 2014 | Disease Analyzer | Applied studies     | Pharmacoeconomics/-epidemiology |
| 40 | 10.3109/09513590.2013.798274    | Prevalence of female subfertility in German gynecologic      | V. Ziller; P. H   | Ziller V       | Gynecol Endo     | 2013 | Disease Analyzer | Applied studies     | General epidemiologic studies   |
| 41 | 10.1007/s00404-014-3449-4       | Time to pregnancy in subfertile women in German gyne         | V. Ziller; C. H   | Ziller V       | Arch Gynecol     | 2015 | Disease Analyzer | Applied studies     | General epidemiologic studies   |
| 42 | 10.2147/ceor.S23158             | The role of galenic innovation in improving treatment co     | Y. Zoellner; M    | Zoellner Y     | Clinicoecon O    | 2011 | Disease Analyzer | Applied studies     | Pharmacoeconomics/-epidemiology |
| 43 | 10.1007/s00103-023-03691-7      | [BeoNet-Halle—development of a multifunctional datab         | K. Moser; R. M    | Moser K        | Bundesgesund     | 2023 | BeoNet-Halle     | Methodological stud | Database-specific research      |
| 44 |                                 |                                                              |                   |                |                  |      |                  |                     |                                 |
| 45 |                                 |                                                              |                   |                |                  |      |                  |                     |                                 |
| 46 |                                 |                                                              |                   |                |                  |      |                  |                     |                                 |
| 47 |                                 |                                                              |                   |                |                  |      |                  |                     |                                 |
| 48 |                                 |                                                              |                   |                |                  |      |                  |                     |                                 |
| 49 |                                 |                                                              |                   |                |                  |      |                  |                     |                                 |
| 50 |                                 |                                                              |                   |                |                  |      |                  |                     |                                 |
| 51 |                                 |                                                              |                   |                |                  |      |                  |                     |                                 |
| 52 |                                 |                                                              |                   |                |                  |      |                  |                     |                                 |
| 53 |                                 |                                                              |                   |                |                  |      |                  |                     |                                 |
| 54 |                                 |                                                              |                   |                |                  |      |                  |                     |                                 |
| 55 |                                 |                                                              |                   |                |                  |      |                  |                     |                                 |
| 56 |                                 |                                                              |                   |                |                  |      |                  |                     |                                 |
| 57 |                                 |                                                              |                   |                |                  |      |                  |                     |                                 |
| 58 |                                 |                                                              |                   |                |                  |      |                  |                     |                                 |
| 59 |                                 |                                                              |                   |                |                  |      |                  |                     |                                 |
| 60 |                                 |                                                              |                   |                |                  |      |                  |                     |                                 |

| sample of publications      | ICD-10 category                                | main medication          | study design    | control group | other DB included | industry funded | practices total | non-GP included | no. months of follow-up |
|-----------------------------|------------------------------------------------|--------------------------|-----------------|---------------|-------------------|-----------------|-----------------|-----------------|-------------------------|
| Treatment-related Study     | Diseases of the respiratory system             | Budesonide/F             | Cohort          | no            | no                | yes             | unknown         | no              | 49 unknown              |
| Incidence and Prevalence    | Diseases of the musculoskeletal system         | -                        | Cohort          | no            | yes               | yes             | 400             | yes             | 6 yes                   |
| Project Description         | Not Applicable                                 | -                        | Methodologic    | no            | no                | no              | 0               | no              | unknown unknown         |
| Treatment-related Study     | Mental and behavioural disorders               | SSRIs(Escitalopram)      | Case-Control    | yes           | no                | unknown         | unknown         | no              | 60 unknown              |
| EHR Database Validation     | Multiple Diseases                              | -                        | Cohort          | no            | no                | yes             | 1511            | no              | 36 unknown              |
| Prescription Patterns       | Diseases of the respiratory system             | Mometasone               | Retrospective   | no            | no                | unknown         | unknown         | yes             | 55 unknown              |
| Incidence and Prevalence    | Mental and behavioural disorders               | Antipsychotics           | -               | no            | no                | no              | 209             | yes             | 48 yes                  |
| Incidence and Prevalence    | Mental and behavioural disorders               | Anti-Dementia            | Case-Control    | yes           | no                | no              | 203             | yes             | 84 yes                  |
| Incidence and Prevalence    | Mental and behavioural disorders               | -                        | Cohort          | no            | no                | no              | 485             | yes             | 132 unknown             |
| Diagnosis Study             | Mental and behavioural disorders               | -                        | Case-Control    | yes           | no                | no              | 957             | yes             | 24 unknown              |
| Treatment-related Study     | Mental and behavioural disorders               | Neuroleptics             | cohort          | no            | no                | no              | 55              | yes             | 36 unknown              |
| Prescription Patterns       | Mental and behavioural disorders               | -                        | Cohort          | no            | no                | yes             | unknown         | yes             | 240 yes                 |
| Diagnosis Study             | Diseases of the nervous system                 | -                        | Case-Control    | yes           | no                | unknown         | unknown         | no              | unknown unknown         |
| Treatment-related Study     | Mental and behavioural disorders               | Antidepressants          | Cohort          | no            | no                | unknown         | 1412            | yes             | 120 unknown             |
| Risk & Comorbidity Analysis | Mental and behavioural disorders               | -                        | Case-Control    | yes           | no                | no              | unknown         | no              | 60 unknown              |
| Treatment-related Study     | Diseases of the circulatory system             | -                        | Cohort          | no            | no                | yes             | 922             | no              | 12 unknown              |
| Prescription Patterns       | Multiple Diseases                              | Opioids (Codeine)        | Cohort          | no            | yes               | yes             | unknown         | yes             | 60 yes                  |
| Treatment-related Study     | Multiple Diseases                              | -                        | Cross-sectional | no            | no                | unknown         | 800             | yes             | 109 unknown             |
| Treatment-related Study     | Diseases of the circulatory system             | Apixaban                 | Case-Control    | yes           | no                | yes             | unknown         | yes             | 27 yes                  |
| Prescription Patterns       | Diseases of the circulatory system             | Oral Anticoagulants      | Cohort          | no            | no                | yes             | unknown         | no              | 22 unknown              |
| Incidence and Prevalence    | Diseases of the digestive system               | Angiotensin inhibitors   | Cohort          | no            | yes               | yes             | 0               | no              | unknown unknown         |
| Prescription Patterns       | Diseases of the respiratory system             | Macrolide (Azithromycin) | -               | no            | no                | yes             | 156             | yes             | 60 yes                  |
| Risk & Comorbidity Analysis | Diseases of the nervous system                 | -                        | cohort          | yes           | no                | no              | 1274            | no              | 168 unknown             |
| Risk & Comorbidity Analysis | Diseases of the circulatory system             | -                        | cohort          | yes           | no                | no              | 1274            | no              | 168 yes                 |
| Risk & Comorbidity Analysis | Mental and behavioural disorders               | -                        | Case-Control    | yes           | no                | no              | 256             | yes             | 12 unknown              |
| Incidence and Prevalence    | Mental and behavioural disorders               | -                        | Case-Control    | yes           | no                | no              | 1072            | no              | 109 yes                 |
| Prescription Patterns       | Mental and behavioural disorders               | Antidepressants          | Case-Control    | yes           | no                | unknown         | unknown         | no              | 120 yes                 |
| Prescription Patterns       | Diseases of the respiratory system             | -                        | Cohort          | no            | no                | yes             | 1630            | yes             | 24 unknown              |
| Prescription Patterns       | Multiple Diseases                              | Azm (Azilsartan)         | Cohort          | no            | no                | yes             | 1141            | no              | 24 unknown              |
| Prescription Patterns       | Neoplasms                                      | Analgesics And           | Cross-sectional | no            | no                | no              | 31              | no              | 24 yes                  |
| Prescription Patterns       | Diseases of the circulatory system             | Moderate-/High           | cohort          | no            | no                | yes             | unknown         | yes             | 36 yes                  |
| Incidence and Prevalence    | Diseases of the genitourinary system           | -                        | Cross-sectional | no            | no                | no              | 136             | yes             | 120 unknown             |
| Treatment-related Study     | Diseases of the nervous system                 | -                        | cohort          | no            | no                | unknown         | 1218            | yes             | 48 unknown              |
| Risk & Comorbidity Analysis | Diseases of the musculoskeletal system         | Oral Bisphosphonates     | Cohort          | no            | no                | yes             | unknown         | yes             | 36 unknown              |
| Treatment-related Study     | Neoplasms                                      | Tamoxifen (Tamoxifen)    | Cohort          | no            | no                | yes             | 2464            | yes             | 111 unknown             |
| Treatment-related Study     | Neoplasms                                      | Bisphosphonates          | Cohort          | no            | no                | yes             | 2464            | yes             | 120 yes                 |
| Prescription Patterns       | Diseases of the nervous system                 | Antiepileptic Drugs      | Cross-sectional | no            | no                | yes             | unknown         | yes             | 12 unknown              |
| Prescription Patterns       | Diseases of the nervous system                 | Antiepileptic Drugs      | Cross-sectional | no            | no                | no              | 346             | yes             | unknown unknown         |
| Prescription Patterns       | Endocrine, nutritional and metabolic disorders | Dapagliflozin            | Cross-sectional | no            | no                | yes             | 0               | no              | 18 unknown              |
| Prescription Patterns       | Diseases of the circulatory system             | Antihypertensives        | Cohort          | no            | no                | unknown         | 309             | yes             | unknown yes             |
| Health Service Utilization  | Diseases of the respiratory system             | -                        | Cross-sectional | no            | no                | no              | 8               | no              | 13 unknown              |
| Health Service Utilization  | Multiple Diseases                              | -                        | Cross-sectional | no            | no                | no              | 118             | no              | 132 unknown             |
| Health Service Utilization  | Not Applicable                                 | -                        | Cross-sectional | no            | no                | no              | 123             | no              | 121 unknown             |
| Health Service Utilization  | Neoplasms                                      | -                        | Case-Control    | yes           | no                | no              | 153             | no              | 121 unknown             |
| Data Collection Issues      | Not Applicable                                 | -                        | Methodologic    | no            | no                | no              | 0               | no              | unknown unknown         |
| Data Collection Issues      | Not Applicable                                 | -                        | Methodologic    | no            | no                | no              | 0               | no              | unknown unknown         |
| Data Collection Issues      | Not Applicable                                 | -                        | methodologic    | no            | no                | no              | 7               | no              | unknown unknown         |
| Prescription Patterns       | Diseases of the respiratory system             | Antibiotics              | Cohort          | yes           | no                | no              | 48              | yes             | 50 unknown              |
| Prescription Patterns       | Diseases of the respiratory system             | Codeine                  | Cohort          | no            | yes               | no              | 0               | no              | 66 unknown              |

|    |                             |                                          |                 |                 |     |     |         |         |     |                |         |  |
|----|-----------------------------|------------------------------------------|-----------------|-----------------|-----|-----|---------|---------|-----|----------------|---------|--|
| 1  |                             |                                          |                 |                 |     |     |         |         |     |                |         |  |
| 2  | Prescription Patterns       | Symptoms, signs and abnormal             | Tramadol        | Cohort          | no  | yes | no      | 0       | no  | 126            | unknown |  |
| 3  | Risk & Comorbidity Analysis | Diseases of the digestive system         | Metamizole      | cohort          | no  | no  | no      | unknown | yes | 120            | yes     |  |
| 4  | Risk & Comorbidity Analysis | Diseases of the genitourinary            | -               | Case-Control    | yes | no  | unknown | unknown | yes | 120            | unknown |  |
| 5  | Prescription Patterns       | Endocrine, nutritional and metabolic     | Insulin         | Cohort          | no  | no  | no      | 32      | yes | 60             | unknown |  |
| 6  | Prescription Patterns       | Diseases of the genitourinary            | Capnephron      | Cohort          | yes | no  | yes     | unknown | yes | 42             | unknown |  |
| 7  | Data Collection Issues      | Not Applicable                           | -               | Methodologic    | no  | no  | no      | 0       | no  | unknown        | unknown |  |
| 8  | Quality of Care             | Diseases of the circulatory system       | Cardiovascular  | Cross-sectional | no  | no  | no      | 5       | no  | 43             | unknown |  |
| 9  | Prescription Patterns       | Endocrine, nutritional and metabolic     | -               | Case-Control    | yes | no  | no      | 400     | yes | 109            | unknown |  |
| 10 | Prescription Patterns       | Endocrine, nutritional and metabolic     | pentaerythritol | Cohort          | yes | no  | no      | unknown | no  | 61             | unknown |  |
| 11 | Risk & Comorbidity Analysis | Neoplasms                                | -               | Case-Control    | yes | no  | no      | unknown | no  | 60             | unknown |  |
| 12 | Incidence and Prevalence    | Neoplasms                                | -               | Cohort          | no  | no  | unknown | 1202    | no  | 60             | unknown |  |
| 13 | Prescription Patterns       | Mental and behavioural disorders         | SSRIs           | Retrospective   | no  | no  | no      | 223     | yes | 48             | yes     |  |
| 14 | Treatment-related Study     | Neoplasms                                | Metformin       | Cohort          | no  | no  | no      | unknown | no  | 108            | yes     |  |
| 15 | Obstetrics and Gynecology   | Pregnancy, childbirth and the puerperium | -               | Case-Control    | yes | no  | no      | unknown | yes | 48             | unknown |  |
| 16 | Obstetrics and Gynecology   | Pregnancy, childbirth and the puerperium | -               | cohort          | yes | no  | no      | unknown | yes | 168            | yes     |  |
| 17 | Prescription Patterns       | Mental and behavioural disorders         | -               | Cohort          | no  | no  | unknown | unknown | no  | unknown        | unknown |  |
| 18 | Risk & Comorbidity Analysis | Mental and behavioural disorders         | Antidepressants | Cohort          | yes | no  | unknown | unknown | yes | 37             | unknown |  |
| 19 | Incidence and Prevalence    | Diseases of the nervous system           | -               | Case-Control    | yes | no  | no      | unknown | no  | 25             | unknown |  |
| 20 | Treatment-related Study     | Diseases of the musculoskeletal system   | 13 Different B  | Retrospective   | no  | no  | no      | 21      | yes | 108            | yes     |  |
| 21 | Risk & Comorbidity Analysis | Pregnancy, childbirth and the puerperium | -               | Case-Control    | yes | no  | no      | 281     | yes | 60             | unknown |  |
| 22 | Health Service Utilization  | Not Applicable                           | -               |                 | no  | no  | no      | 48      | yes | not applicable | unknown |  |
| 23 | Prescription Patterns       | Diseases of the genitourinary            | Darifenacin, F  | Retrospective   | no  | no  | unknown | 1286    | yes | 96             | yes     |  |
| 24 | Obstetrics and Gynecology   | Neoplasms                                | -               | Retrospective   | no  | no  | unknown | 102     | yes | not applicable | no      |  |
| 25 | Risk & Comorbidity Analysis | Mental and behavioural disorders         | Adh Medication  | Cross-sectional | no  | yes | no      | unknown | yes | 12             | unknown |  |
| 26 | Risk & Comorbidity Analysis | Diseases of the digestive system         | -               | cohort          | yes | no  | no      | 1262    | no  | 192            | yes     |  |
| 27 | Incidence and Prevalence    | Diseases of the respiratory system       | Antibiotics     | Case-Control    | yes | no  | yes     | 1473    | yes | 51             | unknown |  |
| 28 | Data Collection Issues      | Not Applicable                           | -               | Methodologic    | no  | no  | no      | 0       | no  | unknown        | unknown |  |
| 29 | Unified Modeling Language   | Not Applicable                           | -               | Methodologic    | no  | no  | no      | 0       | no  | unknown        | unknown |  |
| 30 | Risk & Comorbidity Analysis | Diseases of the respiratory system       | -               | cross-sectional | no  | no  | no      | unknown | yes | unknown        | yes     |  |
| 31 | Treatment-related Study     | Endocrine, nutritional and metabolic     | Vildagliptin    | Cohort          | no  | no  | yes     | unknown | yes | 84             | unknown |  |
| 32 | Incidence and Prevalence    | Diseases of the circulatory system       | -               | Case-Control    | yes | no  | no      | unknown | no  | 120            | unknown |  |
| 33 | Prescription Patterns       | Mental and behavioural disorders         | SSRI            | Case-Control    | yes | no  | no      | 175     | yes | 120            | unknown |  |
| 34 | Incidence and Prevalence    | Mental and behavioural disorders         | -               | Case-Control    | yes | no  | no      | unknown | no  | 108            | unknown |  |
| 35 | Quality of Care             | Diseases of the circulatory system       | -               | Cross-sectional | no  | no  | no      | 5       | no  | 43             | unknown |  |
| 36 | Treatment-related Study     | Endocrine, nutritional and metabolic     | Basal Support   | Cohort          | no  | no  | no      | 1137    | yes | 204            | unknown |  |
| 37 | Risk & Comorbidity Analysis | Endocrine, nutritional and metabolic     | Insulin Glargin | Cohort          | no  | no  | yes     | 1251    | yes | 87             | unknown |  |
| 38 | Prescription Patterns       | Endocrine, nutritional and metabolic     | Intensified Co  | Cohort          | no  | no  | yes     | unknown | no  | 102            | unknown |  |
| 39 | Treatment-related Study     | Neoplasms                                | Tamoxifen       | Cohort          | no  | no  | unknown | unknown | no  | 48             | yes     |  |
| 40 | Treatment-related Study     | Mental and behavioural disorders         | Antidepressants | Retrospective   | no  | yes | unknown | unknown | yes | 35             | unknown |  |
| 41 | Prescription Patterns       | Endocrine, nutritional and metabolic     | -               | Cohort          | no  | yes | yes     | unknown | no  | 192            | yes     |  |
| 42 | Incidence and Prevalence    | Mental and behavioural disorders         | -               | Case-Control    | yes | no  | no      | unknown | no  | 120            | unknown |  |
| 43 | Prescription Patterns       | Endocrine, nutritional and metabolic     | Metformin       | Cohort          | yes | no  | yes     | 0       | no  | unknown        | unknown |  |
| 44 | Incidence and Prevalence    | Endocrine, nutritional and metabolic     | -               | Cohort          | no  | no  | yes     | 1072    | no  | 12             | unknown |  |
| 45 | Incidence and Prevalence    | Endocrine, nutritional and metabolic     | -               | Cohort          | no  | yes | yes     | unknown | no  | 60             | unknown |  |
| 46 | Epidemiology Adverse Events | Mental and behavioural disorders         | SsrIs           | Retrospective   | no  | yes | no      | 1192    | no  | 48             | yes     |  |
| 47 | Treatment-related Study     | Neoplasms                                | -               | Cohort          | no  | no  | no      | unknown | no  | 132            | unknown |  |
| 48 | Treatment-related Study     | Endocrine, nutritional and metabolic     | Basal Insulin T | Retrospective   | no  | no  | unknown | 1024    | yes | 48             | yes     |  |
| 49 | Incidence and Prevalence    | Endocrine, nutritional and metabolic     | -               | Cohort          | yes | no  | yes     | unknown | no  | 103            | no      |  |
| 50 | Treatment-related Study     | Endocrine, nutritional and metabolic     | Metformin       | Retrospective   | no  | no  | unknown | 842     | yes | 48             | yes     |  |
| 51 | Prescription Patterns       | Neoplasms                                | Opioids         | Cohort          | yes | no  | no      | 1348    | yes | 60             | yes     |  |

|    |                            |                                |                 |               |     |     |         |         |     |         |         |         |
|----|----------------------------|--------------------------------|-----------------|---------------|-----|-----|---------|---------|-----|---------|---------|---------|
| 1  |                            |                                |                 |               |     |     |         |         |     |         |         |         |
| 2  | Incidence and Prevalence   | Endocrine, nutritional and m   | Statin Therapy  | Cross-section | no  | no  | unknown | 1262    | no  |         | 12      | unknown |
| 3  | Treatment-related Study    | Endocrine, nutritional and m   | Dapagliflozin   | Cohort        | yes | no  | yes     | unknown | no  |         | 32      | unknown |
| 4  | Prescription Patterns      | Endocrine, nutritional and m   | Antidiabetic D  | cohort        | yes | no  | no      | unknown | yes |         | 60      | unknown |
| 5  | Prescription Patterns      | Endocrine, nutritional and m   | Basal Insulin S | Cohort        | yes | no  | no      | unknown | no  |         | 24      | unknown |
| 6  | Treatment-related Study    | Multiple Diseases              | -               | Cross-section | no  | no  | unknown | unknown | no  |         | 12      | no      |
| 7  | Incidence and Prevalence   | Mental and behavioural diso    | -               | Cross-section | no  | no  | no      | 168     | yes |         | 21      | unknown |
| 8  | Risk & Comorbidity Analy   | Diseases of the nervous syste  | -               | cohort        | no  | no  | no      | 1182    | no  |         | 108     | yes     |
| 9  | Treatment-related Study    | Diseases of the respiratory sy | Ivy Leaf Dry Ex | Cohort        | yes | no  | yes     | 1032    | no  |         | 48      | unknown |
| 10 | Treatment-related Study    | Diseases of the respiratory sy | Ivy Leaf Dry Ex | Cohort        | yes | no  | yes     | 1032    | no  |         | 48      | unknown |
| 11 | Risk & Comorbidity Analy   | Neoplasms                      | Metformin       | Cohort        | yes | no  | no      | unknown | yes |         | 156     | yes     |
| 12 | Quality of Care            | Endocrine, nutritional and m   | -               |               | no  | no  | no      | 837     | yes |         | 30      | unknown |
| 13 | Incidence and Prevalence   | Mental and behavioural diso    | Antidepressan   | Cohort        | no  | no  | no      | unknown | no  |         | 27      | unknown |
| 14 | Prescription Patterns      | Symptoms, signs and abnorm     | Antibiotics     | Cross-section | no  | no  | no      | 37      | no  |         | 49      | unknown |
| 15 | Treatment-related Study    | Endocrine, nutritional and m   | Insulin Glulisi | Cohort        | yes | no  | unknown | unknown | no  |         | 65      | unknown |
| 16 | Quality of Care            | Diseases of the ear and mast   | -               | Cross-section | no  | no  | no      | 138     | no  |         | 15      | unknown |
| 17 | Health Service Utilization | Multiple Diseases              | -               | Cross-section | no  | no  | no      | 23      | no  |         | 12      | unknown |
| 18 | Prescription Patterns      | Diseases of the nervous syste  | Benzodiazepir   | Cohort        | no  | no  | yes     | 3000    | yes |         | 11      | unknown |
| 19 | Diagnosis Study            | Diseases of the nervous syste  | -               | Case-Control  | yes | no  | yes     | 180     | yes |         | 96      | unknown |
| 20 | Prescription Patterns      | Diseases of the musculoskele   | Teriparatide    | Cohort        | no  | no  | no      | unknown | yes |         | 96      | yes     |
| 21 | Treatment-related Study    | Endocrine, nutritional and m   | Menopausal H    | Retrospective | no  | no  | no      | unknown | yes |         | 120     | yes     |
| 22 | Prescription Patterns      | Endocrine, nutritional and m   | Estrogen Repl   | Retrospective | no  | no  | no      | unknown | yes |         | 120     | yes     |
| 23 | Risk & Comorbidity Analy   | Diseases of the musculoskele   | Dmpa            | Case-Control  | yes | no  | no      | unknown | yes |         | 72      | yes     |
| 24 | Risk & Comorbidity Analy   | Neoplasms                      | Tamoxifen       | cohort        | yes | no  | no      | 196     | yes |         | 252     | yes     |
| 25 | Risk & Comorbidity Analy   | Diseases of the musculoskele   | Progestogen-C   | Case-Control  | yes | no  | no      | 179     | no  |         | 120     | unknown |
| 26 | Risk & Comorbidity Analy   | Diseases of the digestive syst | Proton Pump     | Case-Control  | yes | no  | yes     | unknown | no  |         | 120     | yes     |
| 27 | Risk & Comorbidity Analy   | Diseases of the digestive syst | Proton Pump     | Case-Control  | yes | no  | yes     | 1178    | no  |         | 120     | unknown |
| 28 | Incidence and Prevalence   | Diseases of the digestive syst | -               | Case-Control  | yes | no  | no      | 1262    | no  |         | 192     | yes     |
| 29 | Incidence and Prevalence   | Mental and behavioural diso    | -               | cohort        | yes | no  | yes     | 1262    | no  |         | 192     | yes     |
| 30 | Risk & Comorbidity Analy   | Diseases of the digestive syst | -               | cohort        | yes | no  | yes     | 1034    | yes |         | 168     | yes     |
| 31 | Prescription Patterns      | Diseases of the digestive syst | Diuretics, On-  | Cohort        | no  | no  | no      | unknown | no  |         | 48      | yes     |
| 32 | Prescription Patterns      | Diseases of the nervous syste  | Anti-Seizure D  | Case-Control  | yes | no  | yes     | 236     | yes |         | 96      | unknown |
| 33 | Project Description        | Not Applicable                 | -               | Methodologic  | no  | no  | no      | 0       | no  | unknown | unknown | unknown |
| 34 | Health Service Utilization | Multiple Diseases              | -               | Cross-section | no  | no  | no      | 17      | no  |         | 21      | unknown |
| 35 | Health Service Utilization | Multiple Diseases              | -               | Cross-section | no  | no  | no      | 17      | no  |         | 12      | unknown |
| 36 | Prescription Patterns      | Diseases of the circulatory sy | -               | Cross-section | no  | no  | no      | 22      | no  |         | 12      | unknown |
| 37 | Quality of Care            | Diseases of the circulatory sy | -               |               | no  | no  | no      | unknown | no  | unknown | unknown | unknown |
| 38 | Prescription Patterns      | Endocrine, nutritional and m   | Incretin Mime   | Cross-section | no  | no  | no      | 35      | no  |         | 65      | unknown |
| 39 | Prescription Patterns      | Multiple Diseases              | Phytopharma     | Cross-section | no  | no  | no      | 41      | no  |         | 60      | unknown |
| 40 | Incidence and Prevalence   | Diseases of the blood and bld  | -               | Cross-section | no  | yes | yes     | 4690    | no  |         | 72      | unknown |
| 41 | Project Description        | Not Applicable                 | -               | Methodologic  | no  | no  | no      | 0       | no  | unknown | unknown | unknown |
| 42 | Prescription Patterns      | Diseases of the respiratory sy | Oral Corticost  | Cohort        | no  | no  | yes     | unknown | no  | unknown | unknown | unknown |
| 43 | Incidence and Prevalence   | Diseases of the digestive syst | -               | cohort        | no  | no  | no      | 787     | yes |         | 84      | yes     |
| 44 | Risk & Comorbidity Analy   | Neoplasms                      | -               | cohort        | yes | no  | no      | 1284    | yes |         | 240     | yes     |
| 45 | Risk & Comorbidity Analy   | Neoplasms                      | -               | Case-Control  | yes | no  | no      | 1274    | yes |         | 180     | unknown |
| 46 | Risk & Comorbidity Analy   | Diseases of the digestive syst | -               | cohort        | yes | no  | no      | 1193    | no  |         | 168     | yes     |
| 47 | Risk & Comorbidity Analy   | Diseases of the digestive syst | -               | Case-Control  | yes | no  | yes     | unknown | no  |         | 192     | yes     |
| 48 | Risk & Comorbidity Analy   | Diseases of the circulatory sy | -               | cohort        | yes | no  | no      | 924     | no  |         | 180     | yes     |
| 49 | Epidemiology Adverse Eve   | External causes of morbidity   | Sars-Cov-2 Va   | cohort        | no  | no  | no      | 827     | no  |         | 6       | unknown |
| 50 | Risk & Comorbidity Analy   | Diseases of the respiratory sy | -               | Cross-section | no  | no  | no      | 1056    | no  |         | 13      | unknown |
| 51 | Risk & Comorbidity Analy   | Neoplasms                      | -               | cohort        | yes | no  | no      | 924     | no  |         | 180     | yes     |





|    |                             |                                              |                              |                 |     |     |         |         |     |         |         |
|----|-----------------------------|----------------------------------------------|------------------------------|-----------------|-----|-----|---------|---------|-----|---------|---------|
| 1  |                             |                                              |                              |                 |     |     |         |         |     |         |         |
| 2  | Risk & Comorbidity Analysis | Endocrine, nutritional and metabolic         | -                            | Case-Control    | yes | no  | no      | unknown | yes | unknown | unknown |
| 3  | Prescription Patterns       | Endocrine, nutritional and metabolic         | Insulin Lispro               | Cross-sectional | yes | no  | yes     | unknown | yes | 17      | unknown |
| 4  | Incidence and Prevalence    | Mental and behavioural disorders             | -                            | cohort          | yes | no  | no      | 924     | no  | 180     | yes     |
| 5  | Prescription Patterns       | Multiple Diseases                            | Antiepileptic                | Cross-sectional | yes | no  | no      | unknown | yes | 36      | unknown |
| 6  | Prescription Patterns       | Endocrine, nutritional and metabolic         | Lipid-Lowering               | Cohort          | no  | no  | unknown | 0       | no  | unknown | unknown |
| 7  | Prescription Patterns       | Diseases of the digestive system             | Off-Label Drug               | Cross-sectional | no  | no  | unknown | unknown | no  | unknown | unknown |
| 8  | Incidence and Prevalence    | Diseases of the ear and mastoid              | -                            | Retrospective   | no  | no  | no      | unknown | yes | 216     | yes     |
| 9  | Prescription Patterns       | Mental and behavioural disorders             | Paliperidon ER               | Cohort          | no  | no  | unknown | 997     | yes | unknown | unknown |
| 10 | Prescription Patterns       | Diseases of the nervous system               | Fentanyl (Transdermal)       | Cohort          | yes | no  | unknown | 400     | no  | 36      | unknown |
| 11 | Prescription Patterns       | Multiple Diseases                            | Fentanyl                     | Cohort          | yes | no  | yes     | 400     | yes | 35      | unknown |
| 12 | Prescription Patterns       | Diseases of the nervous system               | Fentanyl (Transdermal)       | Cohort          | yes | no  | unknown | 400     | no  | 36      | unknown |
| 13 | Health Service Utilization  | Multiple Diseases                            | -                            | Cross-sectional | no  | no  | no      | 84      | no  | 97      | unknown |
| 14 | Prescription Patterns       | Multiple Diseases                            | -                            | Cross-sectional | no  | no  | no      | unknown | yes | 12      | unknown |
| 15 | Risk & Comorbidity Analysis | Neoplasms                                    | Anti-Seizure Medication      | Case-Control    | yes | no  | yes     | 1227    | no  | 120     | unknown |
| 16 | Incidence and Prevalence    | Endocrine, nutritional and metabolic         | -                            | Case-Control    | yes | no  | no      | unknown | no  | 192     | yes     |
| 17 | Risk & Comorbidity Analysis | Diseases of the musculoskeletal system       | Aromatase Inhibitors         | Case-Control    | yes | no  | no      | 205     | no  | 132     | yes     |
| 18 | Risk & Comorbidity Analysis | Neoplasms                                    | -                            | Case-Control    | yes | no  | no      | 1262    | no  | 120     | yes     |
| 19 | Incidence and Prevalence    | Diseases of the circulatory system           | -                            | Case-Control    | yes | no  | no      | unknown | no  | 84      | yes     |
| 20 | Incidence and Prevalence    | Injury, poisoning and certain toxic effects  | -                            | Cohort          | yes | no  | no      | unknown | no  | 193     | unknown |
| 21 | Incidence and Prevalence    | Diseases of the respiratory system           | -                            | Cross-sectional | no  | no  | no      | 1186    | yes | 24      | unknown |
| 22 | Risk & Comorbidity Analysis | Mental and behavioural disorders             | -                            | Case-Control    | yes | no  | no      | 185     | yes | 36      | unknown |
| 23 | Risk & Comorbidity Analysis | Diseases of the circulatory system           | Sibutramine                  | Case-Control    | yes | yes | yes     | 0       | no  | 115     | unknown |
| 24 | Prescription Patterns       | Endocrine, nutritional and metabolic         | Blood Glucose                | Cohort          | yes | no  | no      | 323     | yes | 43      | unknown |
| 25 | Incidence and Prevalence    | Endocrine, nutritional and metabolic         | -                            | cohort          | yes | no  | no      | 268     | yes | 60      | yes     |
| 26 | Incidence and Prevalence    | Endocrine, nutritional and metabolic         | -                            | Cross-sectional | no  | no  | no      | 958     | yes | 60      | unknown |
| 27 | Prescription Patterns       | Multiple Diseases                            | -                            | Cross-sectional | no  | yes | no      | unknown | no  | 192     | unknown |
| 28 | Treatment-related Study     | Diseases of the respiratory system           | Novohaler (Ic                | Retrospective   | no  | no  | yes     | unknown | yes | 76      | unknown |
| 29 | Prescription Patterns       | Diseases of the circulatory system           | Sacubitril/Valsartan         | Cohort          | no  | no  | yes     | 1138    | yes | 12      | unknown |
| 30 | Prescription Patterns       | Diseases of the circulatory system           | Sacubitril/Valsartan         | Cohort          | no  | no  | yes     | 1102    | yes | 12      | unknown |
| 31 | Risk & Comorbidity Analysis | Mental and behavioural disorders             | Antihypertensives            | Case-Control    | yes | no  | unknown | 575     | yes | 60      | unknown |
| 32 | Risk & Comorbidity Analysis | Diseases of the skin and subcutaneous tissue | -                            | Cross-sectional | no  | no  | unknown | 1631    | yes | unknown | unknown |
| 33 | Risk & Comorbidity Analysis | Diseases of the circulatory system           | Antihyperglycaemic           | cohort          | no  | no  | no      | unknown | yes | 132     | unknown |
| 34 | Treatment-related Study     | Endocrine, nutritional and metabolic         | -                            | Case-Control    | yes | no  | no      | unknown | yes | unknown | unknown |
| 35 | Incidence and Prevalence    | Diseases of the respiratory system           | -                            | Cross-sectional | no  | no  | no      | 1472    | yes | 12      | unknown |
| 36 | Incidence and Prevalence    | Diseases of the respiratory system           | Short-Acting Beta-2 Agonists | Cross-sectional | no  | no  | yes     | unknown | yes | 12      | unknown |
| 37 | Prescription Patterns       | Endocrine, nutritional and metabolic         | Antidiabetics                | Cohort          | no  | no  | unknown | >400    | no  | 9       | unknown |
| 38 | Prescription Patterns       | Not Applicable                               | Levonorgestrel               | Cohort          | no  | no  | unknown | 164     | yes | 60      | unknown |
| 39 | Risk & Comorbidity Analysis | Diseases of the circulatory system           | Desogestrel, Drospirenone    | Retrospective   | yes | no  | no      | unknown | yes | 72      | yes     |
| 40 | Incidence and Prevalence    | Diseases of the genitourinary system         | -                            | Cross-sectional | yes | no  | no      | 158     | yes | 60      | unknown |
| 41 | Obstetrics and Gynecology   | Endocrine, nutritional and metabolic         | -                            | cohort          | no  | no  | no      | 433     | yes | 144     | unknown |
| 42 | Treatment-related Study     | Multiple Diseases                            | Alendronate Sodium           | Cohort          | no  | yes | yes     | unknown | no  | 60      | yes     |
| 43 | Project Description         | Not Applicable                               | -                            | Methodologic    | no  | no  | no      | 5       | yes | unknown | unknown |
| 44 |                             |                                              |                              |                 |     |     |         |         |     |         |         |
| 45 |                             |                                              |                              |                 |     |     |         |         |     |         |         |
| 46 |                             |                                              |                              |                 |     |     |         |         |     |         |         |
| 47 |                             |                                              |                              |                 |     |     |         |         |     |         |         |
| 48 |                             |                                              |                              |                 |     |     |         |         |     |         |         |
| 49 |                             |                                              |                              |                 |     |     |         |         |     |         |         |
| 50 |                             |                                              |                              |                 |     |     |         |         |     |         |         |
| 51 |                             |                                              |                              |                 |     |     |         |         |     |         |         |
| 52 |                             |                                              |                              |                 |     |     |         |         |     |         |         |
| 53 |                             |                                              |                              |                 |     |     |         |         |     |         |         |
| 54 |                             |                                              |                              |                 |     |     |         |         |     |         |         |
| 55 |                             |                                              |                              |                 |     |     |         |         |     |         |         |
| 56 |                             |                                              |                              |                 |     |     |         |         |     |         |         |
| 57 |                             |                                              |                              |                 |     |     |         |         |     |         |         |
| 58 |                             |                                              |                              |                 |     |     |         |         |     |         |         |
| 59 |                             |                                              |                              |                 |     |     |         |         |     |         |         |
| 60 |                             |                                              |                              |                 |     |     |         |         |     |         |         |

# BMJ Open

## German primary care data collection projects: a scoping review

|                                 |                                                                                                                                                                                                                                                                                                                                                                                                                                                                                                                                                                                                                                                                                                                                                                                                                                                                                                                                                                                                                                                                                                                                                                                                                                                                                                                                                                             |
|---------------------------------|-----------------------------------------------------------------------------------------------------------------------------------------------------------------------------------------------------------------------------------------------------------------------------------------------------------------------------------------------------------------------------------------------------------------------------------------------------------------------------------------------------------------------------------------------------------------------------------------------------------------------------------------------------------------------------------------------------------------------------------------------------------------------------------------------------------------------------------------------------------------------------------------------------------------------------------------------------------------------------------------------------------------------------------------------------------------------------------------------------------------------------------------------------------------------------------------------------------------------------------------------------------------------------------------------------------------------------------------------------------------------------|
| Journal:                        | <i>BMJ Open</i>                                                                                                                                                                                                                                                                                                                                                                                                                                                                                                                                                                                                                                                                                                                                                                                                                                                                                                                                                                                                                                                                                                                                                                                                                                                                                                                                                             |
| Manuscript ID                   | bmjopen-2023-074566.R2                                                                                                                                                                                                                                                                                                                                                                                                                                                                                                                                                                                                                                                                                                                                                                                                                                                                                                                                                                                                                                                                                                                                                                                                                                                                                                                                                      |
| Article Type:                   | Original research                                                                                                                                                                                                                                                                                                                                                                                                                                                                                                                                                                                                                                                                                                                                                                                                                                                                                                                                                                                                                                                                                                                                                                                                                                                                                                                                                           |
| Date Submitted by the Author:   | 12-Jan-2024                                                                                                                                                                                                                                                                                                                                                                                                                                                                                                                                                                                                                                                                                                                                                                                                                                                                                                                                                                                                                                                                                                                                                                                                                                                                                                                                                                 |
| Complete List of Authors:       | <p>Moser, Konstantin; University of Halle Institute of General Practice and Family Medicine, Medical Faculty of the Martin Luther University Halle-Wittenberg; University of Halle Institute of Medical Epidemiology Biometrics and Computer Science, Medical Faculty of the Martin Luther University Halle-Wittenberg</p> <p>Massag, Janka; Institute of Medical Epidemiology, Biometrics, and Informatics, Medical Faculty of the Martin Luther University Halle-Wittenberg</p> <p>Frese, T; Institute of General Practice &amp; Family Medicine, Medical Faculty of the Martin Luther University Halle-Wittenberg</p> <p>Mikolajczyk, Rafael; Institute for Medical Epidemiology, Biometrics and Informatics, Medical Faculty of the Martin Luther University Halle-Wittenberg</p> <p>Christoph, Jan; Junior Research Group (Bio-)Medical Data Science, Medical Faculty of the Martin Luther University Halle-Wittenberg</p> <p>Pushpa, Joshi; Institute of General Practice &amp; Family Medicine, Medical Faculty of the Martin Luther University Halle-Wittenberg</p> <p>Straube, Johanna; Institute of General Practice &amp; Family Medicine, Medical Faculty of the Martin Luther University Halle-Wittenberg</p> <p>Unverzagt, Susanne; Institute of General Practice &amp; Family Medicine, Medical Faculty of the Martin Luther University Halle-Wittenberg</p> |
| <b>Primary Subject Heading</b>: | Health services research                                                                                                                                                                                                                                                                                                                                                                                                                                                                                                                                                                                                                                                                                                                                                                                                                                                                                                                                                                                                                                                                                                                                                                                                                                                                                                                                                    |
| Secondary Subject Heading:      | Health services research, General practice / Family practice, Epidemiology, Health informatics                                                                                                                                                                                                                                                                                                                                                                                                                                                                                                                                                                                                                                                                                                                                                                                                                                                                                                                                                                                                                                                                                                                                                                                                                                                                              |
| Keywords:                       | Primary Care < Primary Health Care, GENERAL MEDICINE (see Internal Medicine), Health informatics < BIOTECHNOLOGY & BIOINFORMATICS                                                                                                                                                                                                                                                                                                                                                                                                                                                                                                                                                                                                                                                                                                                                                                                                                                                                                                                                                                                                                                                                                                                                                                                                                                           |
|                                 |                                                                                                                                                                                                                                                                                                                                                                                                                                                                                                                                                                                                                                                                                                                                                                                                                                                                                                                                                                                                                                                                                                                                                                                                                                                                                                                                                                             |

SCHOLARONE™  
Manuscripts

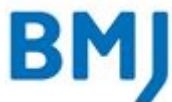

I, the Submitting Author has the right to grant and does grant on behalf of all authors of the Work (as defined in the below author licence), an exclusive licence and/or a non-exclusive licence for contributions from authors who are: i) UK Crown employees; ii) where BMJ has agreed a CC-BY licence shall apply, and/or iii) in accordance with the terms applicable for US Federal Government officers or employees acting as part of their official duties; on a worldwide, perpetual, irrevocable, royalty-free basis to BMJ Publishing Group Ltd ("BMJ") its licensees and where the relevant Journal is co-owned by BMJ to the co-owners of the Journal, to publish the Work in this journal and any other BMJ products and to exploit all rights, as set out in our [licence](#).

The Submitting Author accepts and understands that any supply made under these terms is made by BMJ to the Submitting Author unless you are acting as an employee on behalf of your employer or a postgraduate student of an affiliated institution which is paying any applicable article publishing charge ("APC") for Open Access articles. Where the Submitting Author wishes to make the Work available on an Open Access basis (and intends to pay the relevant APC), the terms of reuse of such Open Access shall be governed by a Creative Commons licence – details of these licences and which [Creative Commons](#) licence will apply to this Work are set out in our licence referred to above.

Other than as permitted in any relevant BMJ Author's Self Archiving Policies, I confirm this Work has not been accepted for publication elsewhere, is not being considered for publication elsewhere and does not duplicate material already published. I confirm all authors consent to publication of this Work and authorise the granting of this licence.

# 1 German primary care data collection projects: a 2 scoping review

3 Konstantin Moser<sup>1,2</sup>, Janka Massag<sup>2</sup>, Thomas Frese<sup>1</sup>, Rafael Mikolajczyk<sup>2</sup>, Jan Christoph<sup>3</sup>, Joshi Pushpa<sup>1</sup>,  
4 Johanna Straube<sup>1</sup>, Susanne Unverzagt<sup>1</sup>

5 <sup>1</sup>Institute of General Practice & Family Medicine, Medical Faculty of the Martin Luther University Halle-Wittenberg, Halle  
6 (Saale), Germany

7 <sup>2</sup>Institute of Medical Epidemiology, Biometrics, and Informatics, Medical Faculty of the Martin Luther University Halle-  
8 Wittenberg, Halle (Saale), Germany

9 <sup>3</sup>Junior Research Group (Bio-)Medical Data Science, Medical Faculty of the Martin Luther University Halle-Wittenberg, Halle  
10 (Saale), Germany

## 11 12 **Corresponding author:**

13 Konstantin Moser (M. Sc.)

14 Institute of General Practice & Family Medicine

15 Magdeburger Str. 8

16 06112, Halle (Saale)

17 Germany

18 konstantin\_moser@web.de

## 19 Abstract

20 **Background:** The widespread use of electronic health records (EHRs) has led to a growing number  
21 of large routine primary care data collection projects globally, making these records a valuable  
22 resource for health services and epidemiological and clinical research. This scoping review aims to  
23 comprehensively assess and compare strengths and limitations of all German primary care data  
24 collection projects and relevant research publications that extract data directly from practice  
25 management systems (PMS).

26 **Methods:** A literature search was conducted in the electronic databases in May 2021 and in June  
27 2022. The search string included terms related to general practice, routine data, and Germany. The  
28 retrieved studies were classified as applied studies and methodological studies, and categorized by  
29 type of research, subject area, sample of publications, disease category, or main medication analyzed.

30 **Results:** A total of 962 references were identified, with 241 studies included from six German  
31 projects in which databases are populated by EHRs from PMS. The projects exhibited significant  
32 heterogeneity in terms of size, data collection methods, and variables collected. The majority of the  
33 applied studies (n = 205, 85%) originated from one database with a primary focus on  
34 pharmacoepidemiologic topics (n = 127, 52%) including prescription patterns (n = 68, 28%) and studies  
35 about treatment outcomes, compliance, and treatment effectiveness (n = 34, 14%). Epidemiologic  
36 studies (n = 77, 32%) mainly focused on incidence and prevalence studies (n = 41, 17%) and risk and  
37 comorbidity analysis studies (n = 31, 12%). Only 10% (n = 23) of studies were in the field of health  
38 services research, such as hospitalization.

39 **Conclusion:** The development and durability of primary care data collection projects in Germany is  
40 hindered by insufficient public funding, technical issues of data extraction, and strict data protection  
41 regulations. There is a need for further research and collaboration to improve the usability of EHRs for  
42 health services and research.

44 **Keywords:** Data collection; Electronic health records; Primary care; Database projects; Routine data;  
45 Scoping review.

47 **Count:** 3902 words

## 48 Strengths and limitations of this study

- 49 • This scoping review is the first in the literature to conduct a comprehensive literature search in  
50 electronic databases, spanning two time points (May 2021 and June 2022). It ensures a thorough  
51 overview of primary care data collection projects and research publications in Germany dedicated  
52 to extracting data from practice management systems.
- 53 • The inclusion of 241 studies from six German projects enabled a detailed analysis, revealing  
54 significant heterogeneity in terms of project size, data collection methods, and variables collected.  
55 This provided valuable insights into the diversity of approaches.
- 56 • The study effectively identifies and discusses key challenges in primary care data collection  
57 projects in Germany, such as the extraction of data from diverse practice management systems,  
58 the lack of standardized interfaces, and issues related to data quality.
- 59 • A limitation of the study is the development of an independent classification system due to the  
60 absence of a common method in the literature. This poses a challenge as some publications may  
61 have been excluded or misclassified, impacting the accuracy of the analysis.

## 62 Introduction

63 Electronic health records (EHRs) serve as a comprehensive record of a patient's health information,  
64 capturing crucial details from each medical visit (1). While originally created for clinical purposes, EHRs  
65 are now widely utilized in epidemiological and clinical research, as well as for improving healthcare  
66 services (2, 3). Currently, about 36 large routine primary care data collection projects exist globally, in  
67 which EHRs are directly collected from practice management systems (PMS). These projects, which  
68 allow millions of patients to anonymously contribute data for health sciences, are mainly carried out  
69 in English-speaking (United Kingdom, USA, and Canada) and European countries. The success and  
70 longevity of these projects is influenced by factors such as strong academic and governmental support  
71 as well as the use of comprehensive technical facilities for data extraction and analysis (4).

72 In Germany, the analysis of EHRs in primary care is largely based on health insurance data rather than  
73 primary care data collection projects (5). However, health insurance data is primarily recorded for  
74 accounting purposes and lacks valuable information such as clinical input data, reasons for encounters,  
75 or diagnostic procedures (6). Additionally, privately insured patients, which account for approximately  
76 13% of the German population, are often not included in such health insurance databases, potentially  
77 leading to selection bias (7).

78 Primary care in Germany is predominantly delivered by general practitioners (GPs) but may also  
79 encompass any outpatient physician accessible without a referral, irrespective of their specialty (8).  
80 Between 2002-2010, the Federal Ministry of Education and Research (Bundesministerium für Bildung  
81 und Forschung [BMBF]) recognized the importance of family medicine in the improvement of  
82 healthcare services and research (9). During this time, the ministry also funded two primary care data  
83 collection projects, MedVip (Medizinische Versorgung in Praxen) and CONTENT (CONTinuous  
84 morbidity registration Epidemiologic NeTwork) (10). However, these projects ended due to limited  
85 funding and technical challenges, and a standardized interface for extracting EHRs is still lacking, even  
86 though there are over 132 different PMS available on the German market (11-13). Despite these  
87 challenges, the use of EHRs in outpatient care continues to grow due to the vast amount of data  
88 available. In 2020, for example, approximately 688 million outpatient cases were treated by 161,400  
89 outpatient physicians in Germany, representing a "real world data treasure" (14).

90 EHRs have evolved from their initial purpose of billing to becoming a valuable tool for epidemiologic  
91 and clinical research (2, 3). The increasing functionality and quality of EHRs have made them an  
92 affordable and accessible data source (15). In clinical research, for example, EHRs can facilitate patient  
93 identification and recruitment, assess study feasibility, and streamline data collection at baseline and  
94 follow-up (15-17).

95 The aim of this scoping review is to identify and describe all primary care data collection projects and  
96 research publications in Germany dedicated to extracting data from PMS. This might facilitate further  
97 research by describing the methodologic problems, amplifying possible solutions, and proposing the  
98 potential of the projects to inform health policy and practice. To this end, we chose to conduct a  
99 scoping review, since our goal is to identify and map study characteristics and not to answer a clinically  
100 meaningful question (18).

## 101 Methods

### 102 Search strategy

103 This scoping review follows the Preferred Reporting Items for Systematic Reviews and Meta-Analyses  
104 extension for Scoping Reviews (PRISMA-ScR) checklist (19). In order to identify studies relevant for our  
105 research question, we explored two electronic databases, Medline (via OVID) and LIVIVO, the latter of  
106 which is a German database for life sciences. The search was conducted in May 2021 and updated in  
107 June 2022, searching for all records until this time point without any time restrictions. The search string  
108 combined the terms "general practice" with synonyms like "family physician" as well as "routine data".  
109 Other terms such as "electronic health record" or "Germany" were included to cover all relevant  
110 aspects of our research questions. For each keyword, relevant Medical Subject Headings (MeSH) terms  
111 were identified for the Medline exploration. The LIVIVO search was conducted in German with the  
112 equivalent terms. When relevant projects were identified, the project names were added to the search  
113 string to find further publications. In addition, we searched the project websites and contacted the  
114 project's principal investigators (PIs) using a comprehensive checklist that included a list of  
115 publications retrieved by the search to identify any missing project information that was not publicly  
116 available. With encouragement from the PI of the IQVIA™ Disease Analyzer, we also conducted a  
117 search on PubMed (National Library of Medicine [NLM]) using the keywords "Disease Analyzer" and  
118 "Germany" to gather all relevant publications from this database, since a considerable number of  
119 publications were identified through the PubMed search which were not previously found through the  
120 Ovid Medline search. The complete search strategy can be found in the supplement (Table S1).

### 121 Inclusion/Exclusion Criteria

122 Abstract, title, and subsequently full-texts were reviewed independently by three researchers (KM, JM,  
123 and JS) and checked for eligibility. All disagreements were resolved through consensus. If no consensus  
124 was reached, a fourth researcher was consulted (SU). We used two online tools for the screening  
125 process. Rayyan (<https://www.rayyan.ai/>) was used for title and abstract screening and Covidence  
126 (<https://www.covidence.org/>) was used for full-text screening. Both tools allow for each reviewer to  
127 decide if the text should be included, excluded or if it is undecided and to add a reason for this decision.  
128 Decisions were blinded until both reviewers were done with the screening. After both reviewers were  
129 able to see if they agreed or disagreed on the inclusion of a text.

130 Studies were eligible if they met the following inclusion criteria: 1) the study population consisted of  
131 patients who received treatment from primary care physicians but could also include patients who  
132 received care from other specialists who were not considered primary care physicians; 2) use of EHR  
133 data that was initially entered into the PMS independently of primary or secondary purpose; 3) EHR  
134 data was extracted from PMS and transferred to a database; 4) studies utilizing data collected as part  
135 of routine clinical practice; and 5) full-text publications in English or German language. The following  
136 were excluded: 1) health research studies using primary data, health insurance data, and data from  
137 disease registries; 2) conference contributions and publications in languages other than English or  
138 German; and 3) studies collecting supplementary data beyond usual care.

### 139 Data management

140 The identified references were downloaded into the reference manager EndNote Version X7.8 where  
141 potential duplicates were identified with the respective tool. Duplicates that were not identified by  
142 the automated tool due to different spelling were removed manually during the review process.



## 143 Data extraction

144 Information from the retrieved publications was extracted by KM, JM, and JS. JM and JS each reviewed  
145 the included publications using a standardized data extraction template created with Microsoft Word.  
146 The data was double checked by KM and entered in Table S2. We extracted information on the  
147 following: German primary care data collection projects including general information, data collection  
148 methods, data evaluation, and recruitment strategies, and classified studies as applied studies and  
149 methodological studies and categorized type of research into subject area, sample of publications,  
150 disease category, or main medication analyzed.

## 151 Patient and Public Involvement

152 None

## 153 Results

154 We identified 962 references, screened a 291 of those as potentially eligible studies, and included 241  
155 studies conducted with data from six German projects in which databases are filled with EHR from PMS  
156 (see Figure 1).

157 **Figure 1: PRISMA 2020 flow diagram for new systematic reviews which included searches of**  
158 **databases only**

## 159 Database characteristics

160 Four out of six primary health care data collection projects are currently active and two have been  
161 completed (Table 1). This overview is sorted by the year in which data collection began.

162 Of the six, the IQVIA™ Disease Analyser (DA) is the only German project out of the six identified by this  
163 review that is exclusively funded by the pharmaceutical sector. It is specialized in  
164 pharmacoepidemiologic research and is used as an information system for federal health monitoring  
165 (20). Currently, it includes patient records from around 2815 practices, mostly general practices but  
166 also including other specialties like cardiology, dermatology, and pediatrics, which are not linked across  
167 practices (21). With approximately 34 million cases included, it is the largest German primary data  
168 collection database and considered to be nationally representative (22).

169 The other five primary care data collection databases are publicly funded and organized by local  
170 academic research groups. Main financiers are the BMBF and the German Research Foundation (DFG).  
171 The MedVip project aimed to realize first solutions for the use of routine data documentation in the  
172 general practice setting. At its peak, a total of 165 practices with approximately 153,000 patient  
173 datasets were extracted from 21 different PMS providers. The CONTENT project was based on the  
174 International Classification of Primary Care (ICPC) of episodes of care as the primary classification  
175 system (23, 24). Up to 23 practices provided data including approximately 200,000 cases. The project  
176 ended because of very high costs and organizational demand. BeoNet (Beobachtungspraxen-  
177 Netzwerk)-Hannover was integrated within the German Center for Lung Research with an initial focus  
178 on lung diseases and collects data from approximately 16 practices. Currently, the database includes  
179 343.796 cases (25). RADARplus (Routine Anonymised Data for Advanced Health Services Research plus)  
180 aims to develop the infrastructure and technologies, including electronic consent management due to  
181 the German data protection regulations, and collects data from seven practices including 100  
182 pseudonymous cases (21). BeoNet-Halle is the most recent database and includes anonymized as well  
183 as linked pseudonymized datasets from general practices and other types of practices in Germany (26).

1  
2  
3 184 The database includes 71,911 anonymized and 471 pseudonymized datasets from five practices in  
4 185 Saxony-Anhalt region.  
5  
6 186 The frequency of data collection by the projects ranges from weekly (BeoNet-Hannover), monthly (DA,  
7 187 BeoNet-Halle), and quarterly (CONTENT), to time points without a fixed interval (MedVip, RADARplus).  
8 188 It is crucial to note that in principle the data export interval can be configured to any desired value,  
9 189 including very short intervals.  
10  
11  
12  
13  
14  
15  
16  
17  
18  
19  
20  
21  
22  
23  
24  
25  
26  
27  
28  
29  
30  
31  
32  
33  
34  
35  
36  
37  
38  
39  
40  
41  
42  
43  
44  
45  
46  
47  
48  
49  
50  
51  
52  
53  
54  
55  
56  
57  
58  
59  
60

For peer review only

190 *Table 1: Overview of German primary care data collection projects*

|                                                                         | <b>IQVIA™ Disease Analyzer (DA)</b>                         | <b>MedVip (not active)</b>                       | <b>CONTENT (not active)</b>                                                                 | <b>BeoNet-Hannover</b>                                                                | <b>RADARplus*</b>                                                                                                                       | <b>BeoNet-Halle</b>                                              |
|-------------------------------------------------------------------------|-------------------------------------------------------------|--------------------------------------------------|---------------------------------------------------------------------------------------------|---------------------------------------------------------------------------------------|-----------------------------------------------------------------------------------------------------------------------------------------|------------------------------------------------------------------|
| Funding sources                                                         | Private                                                     |                                                  |                                                                                             | Public                                                                                |                                                                                                                                         |                                                                  |
| Homepage                                                                | <a href="https://www.iqvia.com/">https://www.iqvia.com/</a> | n.a.                                             | <a href="http://content-info.org/">http://content-info.org/</a>                             | <a href="https://www.mhh.de/forschung/beonet">https://www.mhh.de/forschung/beonet</a> | <a href="https://generalpractice.umg.eu/forschung/projekte/radarplus/">https://generalpractice.umg.eu/forschung/projekte/radarplus/</a> | <a href="http://www.beonet.org">http://www.beonet.org</a>        |
| Research group                                                          | IQVIA™ Commercial GmbH & Co. OHG                            | University Medical Center Goettingen             | Department of general practice and health services research, Heidelberg University Hospital | Hannover Medical School and German Center for Lung Research                           | University Medical Center Goettingen                                                                                                    | Medical Faculty of the Martin Luther University Halle-Wittenberg |
| Period of data collection                                               | Since 1992                                                  | 2002 to 2010                                     | 2003 to 2014                                                                                | Since 2016                                                                            | Since 2016                                                                                                                              | Since 2020                                                       |
| Included region                                                         | Whole Germany                                               | Goettingen and Freiburg                          | Baden-Wuerttemberg, Hessen, Lower Saxony and Rhineland-Palatinate                           | Whole Germany                                                                         | Goettingen                                                                                                                              | Whole Germany                                                    |
| Frequency of transferring data from PMS to central data collection site | Monthly                                                     | No fixed interval (after a practice appointment) | Quarterly                                                                                   | Weekly                                                                                | No fixed interval (after a practice appointment)                                                                                        | Monthly                                                          |
| Total number of practices (physicians) included (n)                     | 2815 (3540) (November 2022)                                 | 165 (n.a.) (May 2008)                            | 23 (41) (March 2014)                                                                        | 16 (27) (March 2023)                                                                  | 7 (n.a.) (February 2022)                                                                                                                | 5 (40) (February 2023)                                           |
| Total number of patients (n) per data category                          | Anonymized data                                             | 34 million                                       | -                                                                                           | -                                                                                     | -                                                                                                                                       | 71.911                                                           |
|                                                                         | Pseudonymized data                                          | -                                                | 153,000                                                                                     | 200,000                                                                               | 343.796**                                                                                                                               | 100                                                              |

The data sources include both published and unpublished sources. \*Data provided refers to the completed project RADAR, as data from the ongoing project RADARplus are not yet available. \*\* The table reflects our findings, although we received contradictory information regarding the process and status of pseudonymization and obtaining the necessary declarations of consent for this project, so the legal status remains unclear.

n: number; n.a.: not available

## 192 Data collection methods

193 Anonymized data is exclusively collected by the DA and BeoNet-Halle, whereas all other projects  
194 except for the DA obtain pseudonymized data. In order to collect pseudonymized data, BeoNet-  
195 Hannover, RADARplus and BeoNet-Halle have instituted informed consent procedures (Table 2).  
196 RADARplus and BeoNet-Halle employ an adapted version of the modular Broad Consent, as per the  
197 template provided by the Medical Informatics Initiative (MII), allowing for the transfer of identifiable  
198 data in compliance with data protection regulations (27). Using Broad Consent, patients have the  
199 option to provide consent for various modules, encompassing data collection, processing, scientific  
200 utilization of their patient data, as well as the transfer and scientific use of their health insurance data,  
201 along with the possibility for further contact. BeoNet-Hannover has introduced a study-specific  
202 consent procedure. The projects exhibit significant heterogeneity in their workflows related to data  
203 collection, transfer, and storage, including the integration of trust offices in the cases of RADARplus  
204 and BeoNet-Halle.

205 Three projects (MedVip, BeoNet-Hannover, RADARplus) extract data using a universal interface  
206 (Behandlungsdatentransfer [BDT]). BDT was implemented by the central institute for statutory health  
207 care to support data exchange between different PMS. The MedVip project has shown the feasibility  
208 of data extraction using BDT with various implementations by different software providers. However,  
209 its use requires partly that PMS providers assist on-site in extracting the requested data. Despite  
210 several updates to the BDT interface, it may still cause inadequate data quality when extracting data  
211 from different PMS. Since June 2021, an “archive and exchange interface” is mandatory in PMS which  
212 shall replace BDT. It is based on the interoperability standard HL7 FHIR (Health Level Seven  
213 International Fast Healthcare Interoperability Resources), which has gained widespread adoption in  
214 the healthcare industry and facilitates interoperability.

215 The other projects (DA, CONTENT, BeoNet-Halle) developed their own software solutions to extract  
216 predefined datasets. The CONTENT project developed a tailored data extraction software and a  
217 modular ICPC software. For BeoNet-Halle, specific exporting modules allow anonymized or  
218 pseudonymized data extraction depending on a patient's consent status.

219 Some projects (DA, CONTENT, BeoNet-Hannover, and BeoNet-Halle) provide training on how to use  
220 the software and others provide on-site support to extract data (MedVip and RADARplus). For most  
221 projects, data can be uploaded manually by the physician or the research team. Some projects  
222 (BeoNet-Hannover and BeoNet-Halle) have also implemented automatic upload to a secure network  
223 within the database location. Data validation and integrity checks are run in all projects before data is  
224 uploaded to the database and subsequently to an analysis server that can be assessed by researchers.  
225 This process is generally facilitated by a database administrator.

## 226 Anonymization and Pseudonymization Processes

227 We could not find publications on specific details of the anonymization process by the DA. In the case  
228 of MedVip, a custom Java program in doctors' offices removes identifiable BDT fields, except for the  
229 patient ID, and encrypts BDT files. For CONTENT, the patient's name is replaced with a unique case  
230 number before export. BeoNet Hannover generates automatic pseudonyms from patient IDs for  
231 studies, and data is pseudonymized again before leaving the practice, with data processing managed  
232 by the data manager. RADARplus follows a privacy-by-design approach, manually documenting  
233 consented patients and separating identifiable and medical data. Identifiable data is encrypted and  
234 replaced by a pseudonym provided by a trusted third party. For anonymized data, BeoNet Halle assigns  
235 unique 35-character keys to patients created from the patient ID which changes from export to export.

1  
2  
3 236 For pseudonymized data, it creates temporary pseudonyms for consenting patients sent to a trusted  
4 237 third party for generating permanent pseudonyms, allowing data linkage across multiple sources.  
5  
6  
7  
8  
9  
10  
11  
12  
13  
14  
15  
16  
17  
18  
19  
20  
21  
22  
23  
24  
25  
26  
27  
28  
29  
30  
31  
32  
33  
34  
35  
36  
37  
38  
39  
40  
41  
42  
43  
44  
45  
46  
47  
48  
49  
50  
51  
52  
53  
54  
55  
56  
57  
58  
59  
60

For peer review only

238

Table 2: Data collection methods

|                                                                                                                                                                                                                                                                       |                                | <b>IQVIA™ Disease Analyzer</b>                                                                                                                                      | <b>MedVip (not active)</b>                        | <b>CONTENT (not active)</b>                                                      | <b>BeoNet-Hannover</b>             | <b>RADARplus</b>                                                          | <b>BeoNet-Halle</b>                                      |
|-----------------------------------------------------------------------------------------------------------------------------------------------------------------------------------------------------------------------------------------------------------------------|--------------------------------|---------------------------------------------------------------------------------------------------------------------------------------------------------------------|---------------------------------------------------|----------------------------------------------------------------------------------|------------------------------------|---------------------------------------------------------------------------|----------------------------------------------------------|
| <b>Export types</b>                                                                                                                                                                                                                                                   | Anonymous                      | ✓                                                                                                                                                                   | -                                                 | -                                                                                | -                                  | -                                                                         | ✓                                                        |
|                                                                                                                                                                                                                                                                       | Pseudonymous                   | -                                                                                                                                                                   | ✓                                                 | ✓                                                                                | ✓ *                                | ✓                                                                         | ✓                                                        |
| <b>Export format</b>                                                                                                                                                                                                                                                  |                                | n.a.                                                                                                                                                                | BDT                                               | XML                                                                              | BDT                                | BDT                                                                       | CSV                                                      |
| <b>Medium used to upload into the central database</b>                                                                                                                                                                                                                |                                | n.a.                                                                                                                                                                | Floppy disc or CD send via mail or on-site export | CD, Disc, DVD, email, direct website upload, digital data transfer using GUS box | Internet and secure HTTPS protocol | Via USB into custom software                                              | Internet and secure HTTPS protocol                       |
| <b>Import to Database</b>                                                                                                                                                                                                                                             |                                | n.a.                                                                                                                                                                | Manual                                            | Manual                                                                           | Automatic                          | Manual                                                                    | Automatic or manual                                      |
| <b>Software Details</b>                                                                                                                                                                                                                                               | Interface                      | Not based on BDT interface                                                                                                                                          | Interface for BDT-data export                     | Modular ICPC classification software                                             | Interface for BDT-data export      | Interface for BDT-data export                                             | Universal interface to create a copy of the PMS database |
|                                                                                                                                                                                                                                                                       | Export from different PMSs (n) | 2                                                                                                                                                                   | PMSs with BDT interface                           | 2                                                                                | 2                                  | PMSs with BDT interface                                                   | >70                                                      |
| <b>Databases details</b>                                                                                                                                                                                                                                              | Location                       | Unknown                                                                                                                                                             | Medical Center Goettingen                         | Heidelberg University Clinic hospital                                            | Hannover Medical School Location   | Medical Center Goettingen                                                 | Martin Luther University Halle-Wittenberg                |
|                                                                                                                                                                                                                                                                       | Database                       | n.a.                                                                                                                                                                | MySQL                                             | n.a.                                                                             | Postgre SQL                        | MySQL                                                                     | Postgre SQL                                              |
|                                                                                                                                                                                                                                                                       | Developer                      | n.a.                                                                                                                                                                | Self                                              | Self                                                                             | MUGS Informationsgesellschaft mbH  | Gesellschaft für wissenschaftliche Datenverarbeitung mbH Göttingen (GWDG) | Self                                                     |
|                                                                                                                                                                                                                                                                       | Graphical user interface       | n.a.                                                                                                                                                                | Perl                                              | n.a.                                                                             | PrimeFaces                         | n.a.                                                                      | -                                                        |
|                                                                                                                                                                                                                                                                       | Operating language             | n.a.                                                                                                                                                                | Java                                              | n.a.                                                                             | Java EE6                           | n.a.                                                                      | Python                                                   |
| <b>Linkage to other databases or death records</b>                                                                                                                                                                                                                    |                                | <ul style="list-style-type: none"> <li>No linkage to other IQVIA™ databases</li> <li>Linkage to death records available in a subgroup of patients (~20%)</li> </ul> | -                                                 | -                                                                                | -                                  | -                                                                         | -                                                        |
| <p><b>The data sources include both published and unpublished sources. *Marks a disagreement between our analysis and the projects principle investigator. The table indicates the statement of the principle investigator.</b></p> <p><b>n.a.: not available</b></p> |                                |                                                                                                                                                                     |                                                   |                                                                                  |                                    |                                                                           |                                                          |

## 240 Collected variables and data quality

241 Most projects collect data that is part of health insurance records, encompassing basic patient  
242 demographics, diagnoses, drug prescriptions, and billing codes (Table S3) (28).

243 Lab tests, such as HbA1c, and health utilization variables like referrals or hospitalizations, are  
244 documented by most projects. Additionally, the majority of ongoing projects (DA, MedVip, BeoNet-  
245 Hannover, BeoNet-Halle) capture essential vital signs, including blood pressure, height, weight, and  
246 Body Mass Index (BMI), as well as lifestyle-related factors such as smoking status and allergies (DA,  
247 BeoNet-Hannover, BeoNet-Halle). Regarding sociodemographic variables (e.g., education, income),  
248 number of children, or substance abuse, these variables are not systematically recorded in German  
249 PMS. These variables may be entered into structured or free text fields. To fill this information gap,  
250 some projects use standardized questionnaires (BeoNet-Hannover, BeoNet-Halle) given out to  
251 patients who consented.

252 As for the extraction of free-text data, limited information is available, except for BeoNet-Halle, which  
253 extracts pseudonymized free text. The MedVip project has partially extracted free-text data due to the  
254 absence of data protection regulations during that period.

255 The CONTENT project can be considered the only project that attempted to improve data quality at  
256 the point of data entry. Several quality circles were implemented and proposed solutions were  
257 discussed on a regular basis including training on ICPC-2 coding.

## 258 Recruitment strategies

259 Strategies to recruit GPs and other specialists comprise various financial and non-financial incentives  
260 (Table S4). The DA provides financial incentives of an undisclosed amount, supports practices by using  
261 the exporting software, and provides quarterly feedback reports. Its popularity further seems to  
262 contribute to its recruitment success.

263 Publicly funded projects use only some of these recruitment strategies along their project trajectories.  
264 Snowball recruitment is usually implemented at the start of the project to get it running. There have  
265 been some “cold” acquisition attempts (MedVip, RADARplus) including the distribution of circulars,  
266 but they were associated with low recruitment rates. Some projects use regular or one-time financial  
267 incentives (MedVip, BeoNet-Halle, and CONTENT) while others claim to support practices with  
268 establishing a research infrastructure (BeoNet-Hannover, BeoNet-Halle, and CONTENT). Regular  
269 feedback reports are provided by some projects (DA, MedVip, CONTENT, and BeoNet-Halle). CONTENT  
270 particularly targeted practices with long-term commitment and willingness to code with ICPC. It is also  
271 the only project that developed a protected access area where the patients’ own data could be  
272 accessed. BeoNet-Halle and RADARplus favor practices that integrate consent management.

## 273 Applications of the databases

274 A total of 241 publications were identified (Table S2). Most articles described applied studies (n = 230,  
275 95%) and 5% (n = 11) of the articles described methods (Figure 2). Methodologic studies mainly deal  
276 with project-specific issues, such as project descriptions or data collection issues. 30% (n = 72) of the  
277 studies were industry-funded while only 9% (n = 21) of the publications used data from more than one  
278 database. The mean time of recruitment varied from study to study. However, the overall mean time  
279 of recruitment across all studies was seven years in the DA, 4.75 years in MedVip, and three years in  
280 CONTENT.

281 **Figure 2: Flow diagram of the extracted articles and their arrangement**

282 Of the 241 publications included, 85% (n = 205) were contributed by the DA (*Figure 2 and Table S2*).  
283 52% (n = 127) of the studies deal with pharmacoepidemiologic topics including prescription patterns  
284 (n = 68, 28%) and studies on treatment outcomes, compliance, and treatment effectiveness (n = 34,  
285 14%). Epidemiologic studies (n = 77, 32%) mainly focused on incidence and prevalence (n = 41, 17%)  
286 along with risk and comorbidity analysis (n = 31, 12%). A small proportion included health services  
287 research studies (n = 10, 4%) with topics such as hospitalization.

## 288 Discussion

289 The findings presented in the results section shed light on the landscape of primary care data collection  
290 projects in Germany, where databases are populated with EHRs from PMS. In this discussion, we delve  
291 into the implications of these findings, drawing comparisons with other countries and addressing key  
292 challenges and potential avenues for improvement.

293 In Germany, one notable challenge arises from the extraction of data from more than 132 different  
294 PMS, which currently hinders the uniform consolidation of data for research purposes (13, 29). Despite  
295 the existence of mandatory exchange interfaces, such as *Behandlungsdatentransfer (BDT)* or the  
296 'archive and exchange' interface, no discernible improvements in the ambulatory sector have  
297 manifested in this regard. In contrast, the hospital sector boasts well-established standardized  
298 interfaces for research (11). The development of standardized interfaces has proven to be a complex  
299 and collaborative effort, engaging various stakeholders, including patients, PMS vendors, standards  
300 organizations, and academic institutions (3, 30). Further complicating the situation is the resistance of  
301 PMS vendors to external software modifications (31).

302 One challenge associated with extracting data from diverse PMS lies in the limited control over the  
303 data collection process, thereby compromising the assurance of data quality (32). To illustrate, data  
304 may be gathered as part of routine patient care, encompassing information inputted by physicians for  
305 primary purposes such as patient care, billing processes, or documentation requirements.  
306 Alternatively, data may be collected supplementary to routine care, serving secondary purposes like  
307 research, quality improvement, or public health initiatives. The differentiation between these  
308 purposes becomes challenging due to the integration of data collected through a complex array of  
309 modules and interfaces from various PMS. This complexity is particularly pronounced in cases involving  
310 industrial funding, which was evident in a significant proportion of studies (n = 72, 30%). It underscores  
311 the critical need for transparency and rigor in such studies to maintain scientific integrity, particularly  
312 in light of the increasing use of real-world evidence in early benefit assessments of novel therapies  
313 (33).

314 Another challenge in data quality is a predominance of free-text entries in PMS, making complete  
315 anonymization a complex task (34). EHRs encompass structured data, which is organized, quantifiable  
316 and easily analyzable due to its mostly standardized format, and unstructured data, including free-text  
317 and images. A comprehensive understanding of a patients' health history necessitates the integration  
318 of both types (3). Collaboration with the MII has introduced a Broad Consent concept that allows  
319 patients to agree to the scientific use of their data, potentially easing the extraction of free-text  
320 information in the future (27). Therefore, informed consent emerges as a vital component for  
321 advancing EHR-based research.

322 The limited progress and short duration of publicly funded projects, as observed in this review, may be  
323 attributed to insufficient funding and inadequate government support. Recent projects have received  
324 notably meager funding, especially when compared to government-supported initiatives in other  
325 nations (4). The initial projects highlighted in this review enjoyed comparatively substantial public



326 funding, indicating the need for sustained investment in healthcare research (9). The private funding  
327 of the DA by pharmaceutical companies appears to be a contributing factor to its success.

328 The results indicate that Germany ranks 16th out of 20 analyzed countries in terms of EHR  
329 implementation. This ranking places Germany behind countries like Sweden, Estonia, and the UK,  
330 which have emerged as pioneers in EHR adoption and integration (35, 36). Therefore we conclude that  
331 the rapid digitalization of healthcare systems has significantly influenced the development of primary  
332 care data collection initiatives (4). It is crucial to examine the reasons behind this disparity in EHR  
333 adoption and its impact on healthcare research.

334 Sweden, for example, has efficiently collected and managed patient data through an integrated system  
335 including a unique personal identity number, focusing on patient consent and supporting research and  
336 quality enhancement (37). Estonia adopted a comprehensive eHealth strategy in 2008, utilizing  
337 incentives and penalties to establish a cohesive eHealth infrastructure (38). The UK's Clinical Practice  
338 Research Datalink stands out as a prominent real-world research service that has contributed data to  
339 over 3,000 publications, surpassing all German projects combined by more than twelvefold (39). The  
340 success of these initiatives can be attributed to factors like opt-out regulations, data quality  
341 improvements, and the engagement of healthcare providers (40).

342 Our findings, as presented in the results section, also hold implications for the use of databases filled  
343 with EHR in healthcare and epidemiological research. The results highlight the versatility of such  
344 databases in addressing a wide range of healthcare-related questions, such as evaluating prescription  
345 patterns, treatment outcomes, and analyzing incidence, prevalence, and comorbidities.

## 346 Limitations

347 One major limitation of this scoping review is incomplete information about some projects. Some  
348 information, especially from the DA, is not publicly available due to company confidentiality reasons.  
349 A second limitation was mainly identified during the phase of classifying the publications. We  
350 developed our own classification system, as we were not able to identify a common classification  
351 method in the literature. Some publications listed by the projects' homepages were not included in  
352 our final analysis, because we were not able to verify that they included data from PMS. Out of the  
353 241 included publications, we retrieved full-text for 210 papers and extracted information from the  
354 abstracts for the remaining 31. Many studies did not describe their study design in detail and might  
355 have been classified wrongly. Finally, we only used three literature databases for our investigation,  
356 including one database (LIVIVO) that also includes gray literature.

## 357 Conclusion

358 The development and sustainability of German primary care data collection projects face several  
359 challenges, including limited funding, technical issues related to data extraction, and stringent data  
360 protection regulations. Interfaces for data exchange and research remain inadequately implemented.  
361 Furthermore, questions regarding data quality and the broad utilization of ambulatory EHRs for  
362 research persist, largely due to the significant amount of information entered in free-text fields. This  
363 data can only be partially extracted with patients' informed consent, thereby constraining the range  
364 of research publications, primarily focusing on (pharmaco-)epidemiologic topics derived from a  
365 privately funded database. As a result, Germany has yet to fully realize the potential for research made  
366 possible by EHRs.

## References

1. (ONC) TOotNCfHIT. FAQ: what is an electronic health record 2023 [Available from: [https://www.healthit.gov/faq/what-electronic-health-record-ehr#:~:text=An%20electronic%20health%20record%20\(EHR\)%20is%20a%20digital%20version%20of, and%20securely%20to%20authorized%20users.](https://www.healthit.gov/faq/what-electronic-health-record-ehr#:~:text=An%20electronic%20health%20record%20(EHR)%20is%20a%20digital%20version%20of, and%20securely%20to%20authorized%20users.)
2. Modi S, Feldman SS. The Value of Electronic Health Records Since the Health Information Technology for Economic and Clinical Health Act: Systematic Review. *JMIR Med Inform.* 2022;10(9):e37283.
3. Nordo AH, Levaux HP, Becnel LB, Galvez J, Rao P, Stem K, et al. Use of EHRs data for clinical research: Historical progress and current applications. *Learn Health Syst.* 2019;3(1):e10076.
4. Gentil ML, Cuggia M, Fiquet L, Hagenbourger C, Le Berre T, Banatre A, et al. Factors influencing the development of primary care data collection projects from electronic health records: a systematic review of the literature. *BMC Med Inform Decis Mak.* 2017;17(1):139.
5. Swart E, Gothe H, Hoffmann F, Ihle P, Schubert I, Stallmann C, et al. Sonderheft Methodische Aspekte der Sekundärdatenanalyse. *Gesundheitswesen.* 2020;82(S 01):S1-S3.
6. Schubert I, Köster I, Küpper-Nybelen J, Ihle P. [Health services research based on routine data generated by the SHI. Potential uses of health insurance fund data in health services research]. *Bundesgesundheitsblatt Gesundheitsforschung Gesundheitsschutz.* 2008;51(10):1095-105.
7. Akmatov MK, Holstiege J, Steffen A, Bätzing J. Utilization of influenza vaccination among chronically ill individuals in Germany: A nationwide claims-based analysis. *Vaccine.* 2021;39(6):952-60.
8. Blümel M, Spranger A, Achstetter K, Maresso A, Busse R. Germany: Health System Review. *Health Syst Transit.* 2020;22(6):1-272.
9. Bundesausschuss G. Innovationsfonds 2022 [Available from: <https://innovationsfonds.g-ba.de/>].
10. Forschung BfBu. Allgemeinmedizin: Liste der abgeschlossenen Vorhaben 2022 [Available from: <https://www.gesundheitsforschung-bmbf.de/de/allgemeinmedizin-2624.php>].
11. Gematik. Informations-technische Systeme im Krankenhaus 2022 [Available from: <https://fachportal.gematik.de/informationen-fuer/isik#c3740>].
12. Mach Sv. Praxis-Software: Leichter zum PVS-Wechsel? : hausarzt.digital; 2021 [Available from: <https://www.hausarzt.digital/praxis/praxisfuehrung/leichter-zum-pvs-wechsel-95031.html>].
13. Bundesvereinigung K. KBV-Installationsstatistik. 2022.
14. Statista. Anzahl ambulanter ärztlicher Behandlungsfälle und behandelter Personen in Deutschland in den Jahren 2004 bis 2020. 2020 [Available from: <https://de.statista.com/statistik/daten/studie/75608/umfrage/von-aerzten-behandelte-personen-und-aerztliche->].
15. Casey JA, Schwartz BS, Stewart WF, Adler NE. Using Electronic Health Records for Population Health Research: A Review of Methods and Applications. *Annu Rev Public Health.* 2016;37:61-81.
16. Kruse CS, Stein A, Thomas H, Kaur H. The use of Electronic Health Records to Support Population Health: A Systematic Review of the Literature. *J Med Syst.* 2018;42(11):214.
17. Cowie MR, Blomster JI, Curtis LH, Duclaux S, Ford I, Fritz F, et al. Electronic health records to facilitate clinical research. *Clin Res Cardiol.* 2017;106(1):1-9.
18. Munn Z, Peters MDJ, Stern C, Tufanaru C, McArthur A, Aromataris E. Systematic review or scoping review? Guidance for authors when choosing between a systematic or scoping review approach. *BMC Med Res Methodol.* 2018;18(1):143.
19. Tricco AC, Lillie E, Zarin W, O'Brien KK, Colquhoun H, Levac D, et al. PRISMA Extension for Scoping Reviews (PRISMA-ScR): Checklist and Explanation. *Ann Intern Med.* 2018;169(7):467-73.
20. Bundesamt S. Datenquelle: IQVIATM Disease Analyzer 2023 [Available from: [https://www.gbe-bund.de/gbe/ergebnisse.prc\\_tab?fid=453&suchstring=&query\\_id=&sprache=D&fund\\_typ=DQ&methode=&vt=&verwandte=1&page\\_ret=0&seite=1&p\\_sprachkz=D&p\\_uid=&p\\_lfd\\_nr=&p\\_news=&p\\_aid=&hlp\\_nr=&p\\_janein=](https://www.gbe-bund.de/gbe/ergebnisse.prc_tab?fid=453&suchstring=&query_id=&sprache=D&fund_typ=DQ&methode=&vt=&verwandte=1&page_ret=0&seite=1&p_sprachkz=D&p_uid=&p_lfd_nr=&p_news=&p_aid=&hlp_nr=&p_janein=)].

- 1  
2  
3 417 21. Bahls T, Pung J, Heinemann S, Hauswaldt J, Demmer I, Blumentritt A, et al. Designing and  
4 418 piloting a generic research architecture and workflows to unlock German primary care data for  
5 419 secondary use. *J Transl Med.* 2020;18(1):394.
- 6 420 22. Becher H, Kostev K, Schroder-Bernhardi D. Validity and representativeness of the "Disease  
7 421 Analyzer" patient database for use in pharmacoepidemiological and pharmaco-economic studies. *Int J*  
8 422 *Clin Pharmacol Ther.* 2009;47(10):617-26.
- 9 423 23. Laux G, Koerner T, Rosemann T, Beyer M, Gilbert K, Szecsenyi J. The CONTENT project: a  
10 424 problem-oriented, episode-based electronic patient record in primary care. *Inform Prim Care.*  
11 425 2005;13(4):249-55.
- 12 426 24. Doctors WOfF. International Classification of Primary Care 2016 [Available from:  
13 427 [https://www.globalfamilydoctor.com/site/DefaultSite/filesystem/documents/Groups/WICC/Internati](https://www.globalfamilydoctor.com/site/DefaultSite/filesystem/documents/Groups/WICC/International%20Classification%20of%20Primary%20Care%20Dec16.pdf)  
14 428 [onal%20Classification%20of%20Primary%20Care%20Dec16.pdf](https://www.globalfamilydoctor.com/site/DefaultSite/filesystem/documents/Groups/WICC/International%20Classification%20of%20Primary%20Care%20Dec16.pdf).]
- 15 429 25. Lingner H, Aumann I, Wacker M, Kreuter M, Leidl R, von der Schulenburg JG, et al. [Health  
16 430 Science Research with Primary Care Routine Data From Electronic Patient Records: the BeoNet  
17 431 Registry]. *Gesundheitswesen.* 2018;80(11):1026-34.
- 18 432 26. Moser K, Mikolajczyk R, Bauer A, Tiller D, Christoph J, Purschke O, et al. [BeoNet-Halle-  
19 433 development of a multifunctional database for the automated extraction of healthcare data from  
20 434 general practitioner and specialist practices]. *Bundesgesundheitsblatt Gesundheitsforschung*  
21 435 *Gesundheitsschutz.* 2023;66(5):569-77.
- 22 436 27. Medizininformatikinitiative. Template text for patient consent forms 2023 [Available from:  
23 437 <https://www.medizininformatik-initiative.de/en/template-text-patient-consent-forms>.]
- 24 438 28. Bundesvereinigung K. IT in der Arztpraxis: Datensatzbeschreibung KVDT 2023 2023 [Available  
25 439 from: [https://update.kbv.de/ita-](https://update.kbv.de/ita-update/Abrechnung/KBV_ITA_VGEX_Datensatzbeschreibung_KVDT.pdf)  
26 440 [update/Abrechnung/KBV\\_ITA\\_VGEX\\_Datensatzbeschreibung\\_KVDT.pdf](https://update.kbv.de/ita-update/Abrechnung/KBV_ITA_VGEX_Datensatzbeschreibung_KVDT.pdf).]
- 27 441 29. Sauer J. Forschung aus der Praxis für die Praxis. *Der Hausarzt.* 2023.
- 28 442 30. Justiz Bd. Integration offener und standardisierter Schnittstellen in informationstechnische  
29 443 Systeme 2022 [Available from: [https://www.gesetze-im-internet.de/sgb\\_5/\\_371.html](https://www.gesetze-im-internet.de/sgb_5/_371.html).]
- 30 444 31. Ayaz M, Pasha MF, Alzahrani MY, Budiarto R, Stiawan D. The Fast Health Interoperability  
31 445 Resources (FHIR) Standard: Systematic Literature Review of Implementations, Applications, Challenges  
32 446 and Opportunities. *JMIR Med Inform.* 2021;9(7):e21929.
- 33 447 32. Swart E, Gothe H, Geyer S, Jaunzeme J, Maier B, Grobe TG, et al. [Good Practice of Secondary  
34 448 Data Analysis (GPS): guidelines and recommendations]. *Gesundheitswesen.* 2015;77(2):120-6.
- 35 449 33. Schad F, Thronicke A. Real-World Evidence-Current Developments and Perspectives. *Int J*  
36 450 *Environ Res Public Health.* 2022;19(16).
- 37 451 34. Martin-Sanchez FJ, Aguiar-Pulido V, Lopez-Campos GH, Peek N, Sacchi L. Secondary Use and  
38 452 Analysis of Big Data Collected for Patient Care. *Yearb Med Inform.* 2017;26(1):28-37.
- 39 453 35. Bertram N, Püschner F, Gonçalves ASO, Binder S, Amelung VE. Einführung einer elektronischen  
40 454 Patientenakte in Deutschland vor dem Hintergrund der internationalen Erfahrungen. In: Klauber J,  
41 455 Geraedts M, Friedrich J, Wasem J, editors. *Krankenhaus-Report 2019: Das digitale Krankenhaus.* Berlin,  
42 456 Heidelberg: Springer Berlin Heidelberg; 2019. p. 3-16.
- 43 457 36. Amelung V BS, Bertram N, Chase DP, Urbanski D. Die elektronische Patientenakte – Fundament  
44 458 einer effektiven und effizienten Gesundheitsversorgung. Heidelberg: medhochzwei Verlag; 2016.
- 45 459 37. Kajbjer K, Nordberg R, Klein GO, editors. *Electronic Health Records in Sweden: From*  
46 460 *Administrative Management to Clinical Decision Support. History of Nordic Computing 3; 2011 2011//;*  
47 461 *Berlin, Heidelberg: Springer Berlin Heidelberg.*
- 48 462 38. World Health Organization. Regional Office for Europe EOoHSaP, Habicht, Triin, Reinap, Marge,  
49 463 Kasekamp, Kaija. et al. Estonia: health system review. . Regional Office for Europe.: World Health  
50 464 Organization.; 2018.
- 51 465 39. CPRD. Clinical Practice Research Datalink 2022 [Available from: <https://cprd.com/>.]
- 52 466 40. Research NifHaC. Safeguarding patient data 2023 [Available from:  
53 467 <https://cprd.com/safeguarding-patient-data>.]

## 468 Abbreviations

469 BDT: Behandlungsdatentransfer; BeoNet: Beobachtungspraxen-Netzwerk; BMBF: Bundesministerium  
470 für Bildung und Forschung (Federal Ministry of Education and Research); BMI: Body Mass Index;  
471 CONTENT: CONTinuous morbidity registration Epidemiologic NeTwork; CPRD: Clinical Practice  
472 Research Datalink; DA: Disease Analyzer; EHR: Electronic Health Record; GP: general practitioner; HL7  
473 FHIR: Health Level 7 Fast Health Interoperability Resource; ICPC: International Classification of Primary  
474 Care; MedVip: Medizinische Versorgung in Praxen; MeSH: Medical Subject Headings; MII: Medical  
475 Informatics Initiative; n. a.: not available; PI: principal investigator; PMS: Practice management system;  
476 PRISMA-ScR: Preferred Reporting Items for Systematic Reviews and Meta-Analyses extension for  
477 Scoping Reviews; RADARplus: Routine Anonymised Data for Advanced Health Services Research plus.

## 478 Supplementary Information

479 Table S1: Search Strings. Table S2: List of included studies. Table S3: Collected Variables. Table S4: Data  
480 evaluation, access, and recruitment.

## 481 Acknowledgements

482 For proofreading we acknowledge Dawn M. Bielawski, PhD.

## 483 Authors' contributions

484 KM, JM, and SU developed the methodological concept. KM, JM, and JS screened study titles and  
485 abstracts and examined the full texts for inclusion. KM, JM, JS, JC, TF and PJ developed the figures and  
486 tables. KM, JM, SU, TF, RM, PJ and JC participated in reading and approving the final manuscript.

## 487 Funding

488 This study received no funding.

## 489 Availability of data and materials

490 All data generated and analyzed by this study are included in this published article.

## 491 Declarations

### 492 Ethics approval and consent to participate

493 Not applicable.

### 494 Consent for publication

495 Not applicable.

### 496 Competing interests

497 The authors have confirmed that we have no competing interests.

1  
2  
3  
4  
5  
6  
7  
8  
9  
10  
11  
12  
13  
14  
15  
16  
17  
18  
19  
20  
21  
22  
23  
24  
25  
26  
27  
28  
29  
30  
31  
32  
33  
34  
35  
36  
37

Identification  
Screening  
Included

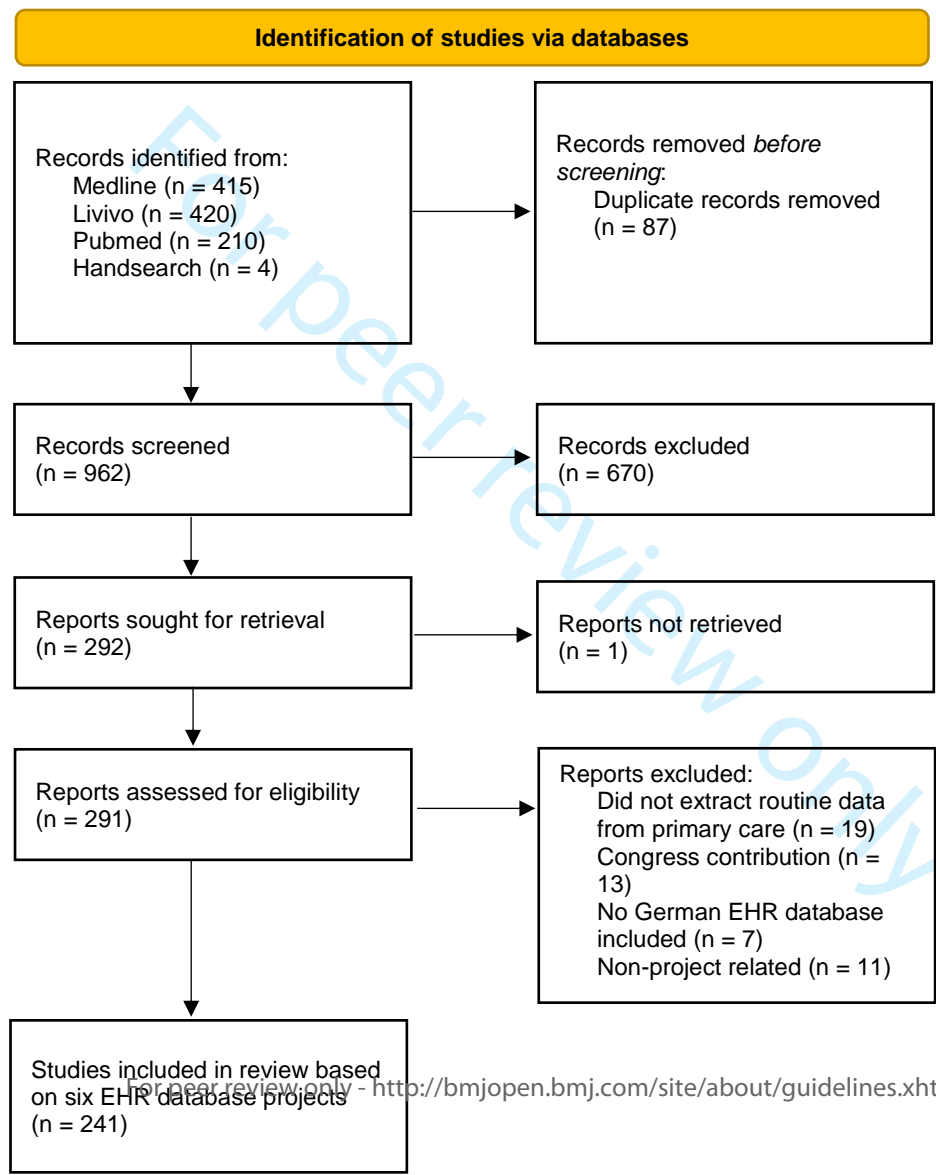

1  
2  
3  
4  
5  
6  
7  
8  
9  
10  
11  
12  
13  
14  
15  
16  
17  
18  
19  
20  
21  
22  
23  
24  
25  
26  
27  
28  
29  
30  
31  
32  
33  
34  
35  
36  
37  
38  
39  
40  
41



Table S1: Search Strategies

Search String for Ovid (June 2022)

| Set | Search Statement                                                           | Results |
|-----|----------------------------------------------------------------------------|---------|
| 1.  | exp Primary Health Care/                                                   |         |
| 2.  | exp General Practice/                                                      |         |
| 3.  | general practitioners/ or physicians, family/ or physicians, primary care/ |         |
| 4.  | general practi*.tw.                                                        |         |
| 5.  | (primary adj3 care).tw.                                                    |         |
| 6.  | (family adj3 (practi* or doctor or physician*)).tw.                        |         |
| 7.  | or/1-6                                                                     |         |
| 8.  | exp medical records/                                                       |         |
| 9.  | exp routinely collected health data/                                       |         |
| 10. | (routine* adj3 (collect* or record* or document*)).tw.                     |         |
| 11. | health servic* research.tw.                                                |         |
| 12. | (electronic adj3 record*).tw.                                              |         |
| 13. | CONTinuous morbidity registration Epidemiologic NeTwork.tw.                |         |
| 14. | Disease Analyzer.tw.                                                       |         |
| 15. | or/8-14                                                                    |         |
| 16. | exp Germany/                                                               |         |
| 17. | German*.tw.                                                                |         |
| 18. | or/16-17                                                                   |         |
| 19. | 7 and 15 and 18                                                            | 415     |

## Search String LIVIVO (June 2022)

| Set | Search Statement              | Results |
|-----|-------------------------------|---------|
| 1   | Haus?rzt                      |         |
| 2   | Primär?rzt*                   |         |
| 3   | Allgemein?rztlich*            |         |
| 4   | Allgemeinmedizin*             |         |
| 5   | Ambulant*                     |         |
| 6   | OR 1-5                        |         |
| 7   | Routinedaten*                 |         |
| 8   | BDT                           |         |
| 9   | Elektronische* Patientenakte* |         |
| 10  | OR 7-9                        |         |
| 11  | 6 AND 10                      | 420     |

## Pubmed (NLM)

Search terms (June 2022):

"Germany"[All Fields] AND "Disease Analyzer"[All Fields]

**210 studies were imported**



Table S3: Collected variables

|                               |                                    | IQVIA™ Disease Analyzer     | MedVip  | CONTENT                      | BeoNet Hannover             | RADARplus                           | BeoNet Halle                |
|-------------------------------|------------------------------------|-----------------------------|---------|------------------------------|-----------------------------|-------------------------------------|-----------------------------|
| <b>Physician types</b>        | All ambulatory                     | ✓                           | -       | -                            | -                           | -                                   | ✓                           |
|                               | General Practitioner               | ✓                           | ✓       | ✓                            | ✓                           | ✓                                   | ✓                           |
|                               | Pneumologists                      | ✓                           | -       | -                            | ✓                           | unknown                             | ✓                           |
|                               | Paediatricians                     | ✓                           | -       | -                            | unknown                     | unknown                             | ✓                           |
|                               | Internists                         | ✓                           | -       | ✓                            | unknown                     | unknown                             | ✓                           |
| <b>Physician demographics</b> | Physician number                   | -                           | unknown | -                            | ✓                           | unknown                             | ✓                           |
|                               | Age                                | ✓                           | -       | ✓                            | unknown                     | -                                   | ✓                           |
|                               | Gender                             | ✓                           | -       | ✓                            | unknown                     | -                                   | ✓                           |
|                               | Years in practice                  | ✓                           | -       | ✓                            | unknown                     | -                                   | ✓                           |
|                               | <b>Practices demographics</b>      | Type                        | ✓       | -                            | ✓                           | ✓                                   | ✓                           |
| Region                        |                                    | ✓                           | ✓       | ✓                            | ✓                           | ✓                                   | ✓                           |
|                               |                                    | east or west                |         | east or west                 |                             |                                     | east or west                |
| Frequency of patients         |                                    | ✓                           | unknown | unknown                      | ✓                           | unknown                             | ✓                           |
| No. of doctors                |                                    | ✓                           | unknown | ✓                            | ✓                           | unknown                             | ✓                           |
| No. of employees              |                                    | ✓                           | unknown | ✓                            | ✓                           | unknown                             | ✓                           |
| <b>Patient demographics</b>   | Age                                | ✓                           | ✓       | ✓                            | ✓                           | ✓                                   | ✓                           |
|                               | Gender                             | ✓                           | ✓       | ✓                            | ✓                           | ✓                                   | ✓                           |
|                               | Patient since                      | -                           | -       | -                            | ✓                           | unknown                             | ✓                           |
|                               | Employment                         | -                           | -       | ✓                            | ✓                           | -                                   | -                           |
|                               | Medical insurance status           | ✓<br>(private or statutory) | -       | ✓<br>(private or statutory)  | ✓<br>(private or statutory) | unknown                             | ✓<br>(private or statutory) |
|                               | Medical insurance provider         | ✓                           | -       | -                            | ✓                           | unknown                             | ✓                           |
|                               | Region                             | ✓                           | -       | ✓                            | ✓                           | unknown                             | ✓                           |
|                               | Nationality                        | east or west<br>unknown     | -       | ✓                            | ✓                           | unknown                             | ✓                           |
| <b>BMI and risk factors</b>   | BMI; smoking and alcohol recording | smoking                     | unknown | BMI, risk factors, allergies | -                           | BMI, BP, HR, allergies, operations, |                             |

|                                                             |                                                                                              |                                                              |                                                                                               |                                                                             |                                                              |                                                                                    |
|-------------------------------------------------------------|----------------------------------------------------------------------------------------------|--------------------------------------------------------------|-----------------------------------------------------------------------------------------------|-----------------------------------------------------------------------------|--------------------------------------------------------------|------------------------------------------------------------------------------------|
|                                                             | rarely documented (~5%)                                                                      |                                                              |                                                                                               |                                                                             |                                                              | smoking status, risk factors                                                       |
| <b>Social history</b>                                       | unknown                                                                                      | -                                                            | unknown                                                                                       | unknown                                                                     | unknown                                                      | -                                                                                  |
| <b>Pregnancy or family status</b>                           | pregnancy, gynecologist records; family data incomplete                                      | -                                                            | unknown                                                                                       | pregnancy, number of children                                               | unknown                                                      | pregnancy, number of children                                                      |
| <b>Diagnosis</b>                                            | diagnosis, ICD 10 codes and original text                                                    | diagnosis, ICD 10 codes and original text, billing codes     | diagnosis, ICD 10 codes, ICPC codes and original text, reasons for encounter, medical history | diagnosis, ICD 10 codes, medical history                                    | diagnosis, ICD 10 codes, medical history                     | diagnosis name, ICD 10 codes, medical history,                                     |
| <b>Billing codes</b>                                        | unknown                                                                                      | yes                                                          | yes                                                                                           | yes                                                                         | unknown                                                      | yes                                                                                |
| <b>procedures, findings, therapies</b>                      | lab test results; other test results variably available or can be requested from paper files | unknown                                                      | lab test results                                                                              | lab and X-ray test results, blood pressure, internal and external findings, | unknown                                                      | lab and X-ray test results, blood pressure, internal and external findings         |
| <b>drug information</b>                                     | drug name, route, dosage, frequency, duration, cost of therapy                               | drug name                                                    | drug name, long term medication, dosage, cost of therapy                                      | drug name and ATC code, (long term) medication, cost of therapy             | drug name, long-term medication, date                        | drug name and ATC code, (long term) medication, dosage, frequency, cost of therapy |
| <b>Healthcare utilization</b>                               | practice visits, referrals, sick leave, hospitalizations                                     | unknown                                                      | practice visits, referrals, sick leave, hospitalizations                                      | practice visits, referrals, sick leave, hospitalizations                    | unknown                                                      | practice visits, referrals, sick leave, hospitalizations                           |
| <b>Images (e.g X-ray)</b>                                   | unknown                                                                                      | no                                                           | no                                                                                            | no                                                                          | no                                                           | no                                                                                 |
| <b>Projects obtaining additional data beyond usual care</b> | yes, Quality of Life questionnaires upon request                                             | yes, study specific                                          | n. a.                                                                                         | yes, study specific                                                         | yes, study specific                                          | yes, study specific                                                                |
| <b>Missing Data</b>                                         | Social and economic data (salary, family status, employment), secondary care data            | social and economic data (salary, family status, employment) | social and economic data (salary, family status, employment), secondary care data,            | social and economic data (salary, family status, employment)                | social and economic data (salary, family status, employment) | social and economic data (salary, family status, employment)                       |

Table S4: Data evaluation and access and recruitment

|                               | <b>IQVIA™ Disease Analyzer</b>  | <b>CONTENT</b>                                                                           | <b>MedVip</b>                              | <b>BeoNet Hannover</b>                          | <b>BeoNet Halle</b>                             | <b>RADARplus</b>                           |                       |
|-------------------------------|---------------------------------|------------------------------------------------------------------------------------------|--------------------------------------------|-------------------------------------------------|-------------------------------------------------|--------------------------------------------|-----------------------|
| In-house data evaluation      | ✓                               | ✓                                                                                        | ✓                                          | ✓                                               | ✓                                               | ✓                                          |                       |
| Feedback reports to practices | ✓                               | ✓                                                                                        | ✓                                          | ✓                                               | ✓                                               | n.a.                                       |                       |
| Interim project reports       | n.a.                            | ✓                                                                                        | ✓                                          | ✓                                               | ✓                                               | n.a.                                       |                       |
| External data access          | ✓                               | -                                                                                        | -                                          | -                                               | n.a.                                            | n.a.                                       |                       |
| Financial incentives          | Yes, but amount unknown         | Quarterly 375 € per practice                                                             | 500 € once per physician                   | -                                               | 2 € per signed broad consent                    | n.a.                                       |                       |
| Type of physician support     | support how to use the software | Training in ICPC coding, hotline for software problems & regular quality circle meetings | On-site support to extract requested data. | establishing a practice research infrastructure | establishing a practice research infrastructure | On-site support to extract requested data. |                       |
| Recruitment Strategy          | Snowball                        | n.a.                                                                                     | -                                          | ✓                                               | ✓                                               | n.a.                                       |                       |
|                               | Presentations                   | n.a.                                                                                     | ✓                                          | n.a.                                            | ✓                                               | ✓                                          |                       |
|                               | Circulars                       | n.a.                                                                                     | ✓                                          | ✓<br>with 2 reminders                           | n.a.                                            | -                                          | ✓<br>E-Mail & written |
|                               | Articles                        | n.a.                                                                                     | ✓                                          | -                                               | ✓                                               | ✓                                          | ✓                     |
|                               | Homepage                        | n.a.                                                                                     | ✓                                          | -                                               | ✓                                               | ✓                                          | ✓                     |
| Patient recruitment through   | -                               | -                                                                                        | Attending physician                        | Attending physician                             | Trusted third party                             | Trusted third party                        |                       |
| n.a.: not available           |                                 |                                                                                          |                                            |                                                 |                                                 |                                            |                       |

1  
2  
3  
4  
5  
6  
7  
8  
9  
10  
11  
12  
13  
14  
15  
16  
17  
18  
19  
20  
21  
22  
23  
24  
25  
26  
27  
28  
29  
30  
31  
32  
33  
34  
35  
36  
37  
38  
39  
40  
41  
42  
43  
44  
45  
46  
47  
48  
49  
50  
51  
52  
53  
54  
55  
56  
57  
58  
59  
60

| DOI                  | Title                     | Authors          | First Author  | Journal           | Publication year |
|----------------------|---------------------------|------------------|---------------|-------------------|------------------|
| 10.1111/j.1742-1241  | A retrospective data      | S. Aballéa; S. C | Aballéa S     | Int J Clin Pract  | 2008             |
| 10.1136/ard.2007.07  | Gout in the UK and G      | L. Annemans;     | Annemans L    | Annals of the     | 2008             |
| 10.1186/s12967-020   | Designing and pilotin     | T. Bahls; J. Pur | Bahls T       | Journal of Tra    | 2020             |
| 10.4088/JCP.19m132   | To Be Continued? Lor      | C. Bartels; M.   | Bartels C     | J Clin Psychiat   | 2020             |
| 10.5414/cpp47617     | Validity and represen     | H. Becher; K. K  | Becher H      | International J   | 2009             |
| 10.5414/cp201756     | Economic prescribing      | B. Becker; S. K  | Becker B      | Int J Clin Pharm  | 2013             |
| 10.1055/s-0043-104   | [High Prevalence of A     | J. Bohlken; A.   | Bohlken J     | Fortschr Neur     | 2017             |
| 10.3233/jad-180567   | Relevance of Coded P      | J. Bohlken; K.   | Bohlken J     | J Alzheimers D    | 2018             |
| 10.3233/jad-181180   | Coded Prevalence of       | J. Bohlken; K.   | Bohlken J     | J Alzheimers D    | 2019             |
| 10.3233/jad-190012   | Diagnostic Behavior f     | J. Bohlken; K.   | Bohlken J     | J Alzheimers D    | 2019             |
| 10.1016/j.psychres.2 | Adherence to neurole      | J. Bohlken; M.   | Bohlken J     | Psychiatry Res    | 2020             |
| 10.3233/jad-215348   | Association Between       | J. Bohlken; O.   | Bohlken J     | J Alzheimers D    | 2022             |
| 10.1159/000520574    | Identification of Prod    | J. Bohlken; A.   | Bohlken J     | Neuroepidem       | 2022             |
| 10.5414/cp202572     | Persistence with anti     | A. Booker; J. B  | Booker A      | Int J Clin Pharm  | 2016             |
| 10.1017/S10416102    | Risk factors for deme     | A. Booker; L. E  | Booker A      | Int Psychoger     | 2016             |
| 10.3111/13696998.2   | Real-life treatment pa    | L. Breitscheide  | Breitscheidel | J Med Econ        | 2012             |
| 10.2217/pmt.14.26    | A description of clinic   | P. Chevalier; N  | Chevalier P   | Pain Manag        | 2014             |
| 10.5414/cp203881     | Prevalence of and rea     | L. Cirkel; M. K  | Cirkel L      | Int J Clin Pharm  | 2021             |
| 10.1016/j.hlc.2017.0 | Comparative Effective     | C. I. Coleman;   | Coleman CI    | Heart Lung Cir    | 2018             |
| 10.1371/journal.pon  | Oral anticoagulant pe     | S. L. Collings;  | Collings SL   | PLoS One          | 2017             |
| 10.1080/14740338.2   | Unspecified intestina     | N. De Bortoli;   | De Bortoli N  | Expert Opin D     | 2017             |
| 10.1016/j.jctube.202 | Real-world treatment      | R. Diel; M. Ob   | Diel R        | J Clin Tuberc C   | 2020             |
| 10.1016/j.yebeh.202  | Epilepsy is associated    | C. Doege; M. L   | Doege C       | Epilepsy Beha     | 2021             |
| 10.1016/j.yebeh.202  | Atrial fibrillation is as | C. Doege; M. L   | Doege C       | Epilepsy Beha     | 2022             |
| 10.1016/j.jpsychires | Factors associated wi     | M. Drewes; M     | Drewes M      | J Psychiatr Res   | 2021             |
| 10.1007/s00198-016   | Depression risk in fen    | J. Drosselmeyer  | Drosselmeyer  | Osteoporos In     | 2016             |
| 10.5414/cp202610     | Prevalence and type       | J. Drosselmeyer  | Drosselmeyer  | Int J Clin Pharm  | 2016             |
| 10.1186/s12889-015   | Cost for physician-dia    | B. Ehlken; A. A  | Ehlken B      | BMC Public He     | 2015             |
| 10.5414/cp203359     | Use of azilsartan med     | B. Ehlken; M. S  | Ehlken B      | International J   | 2019             |
| 10.1007/s00482-016   | [Care of patients with    | P. Engeser; E.   | Engeser P     | Der Schmerz       | 2016             |
| 10.1007/s00392-017   | Treatment patterns a      | K. M. Fox; M. F  | Fox KM        | Clin Res Card     | 2018             |
| 10.22074/ijfs.2021.5 | Germany Endometri         | J. Göhring; M.   | Göhring J     | Int J Fertil Ster | 2022             |
| 10.1212/wnl.000000   | Nonadherence to ant       | S. Gollwitzer;   | Gollwitzer S  | Neurology         | 2016             |
| 10.1007/s00198-011   | GRAND: the German         | P. Hadji; V. Cl  | Hadji P       | Osteoporos In     | 2012             |
| 10.1007/s10549-013   | Persistence in patient    | P. Hadji; V. Zil | Hadji P       | Breast Cancer     | 2013             |
| 10.1007/s00432-013   | Persistence with bisp     | P. Hadji; V. Zil | Hadji P       | J Cancer Res C    | 2013             |
| 10.1007/s00415-012   | Prevalence, utilizatio    | H. M. Hamer;     | Hamer HM      | J Neurol          | 2012             |
| 10.1007/s40263-014   | Sociodemographic di       | H. M. Hamer;     | Hamer HM      | CNS Drugs         | 2014             |
| 10.1016/j.diabres.20 | Early drug use of dap     | M. Hankins; K    | Hankins M     | Diabetes Res C    | 2017             |
| 10.1007/s00228-007   | Persistence with anti     | J. Hasford; D. S | Hasford J     | Eur J Clin Phar   | 2007             |
| 10.1055/s-0030-124   | Influenza-Impfungen       | J. Hauswaldt;    | Hauswaldt J   | Das Gesundhe      | 2010             |
| 10.3238/arztbl.201   | Health service use an     | J. Hauswaldt;    | Hauswaldt J   | Dtsch Arztebl     | 2012             |
| 10.1186/1471-2296-   | The inter-contact inte    | J. Hauswaldt;    | Hauswaldt J   | BMC Family Pe     | 2013             |
| 10.1186/s12875-016   | Does an increase in vi    | J. Hauswaldt;    | Hauswaldt J   | BMC Family Pe     | 2016             |
| 10.1055/a-0668-581   | Hindernisse bei der se    | J. Hauswaldt;    | Hauswaldt J   | Gesundheitsw      | 2018             |
| 10.1016/j.zefq.2020. | [The risk of re-identif   | J. Hauswaldt;    | Hauswaldt J   | Zeitschrift fur   | 2019             |
| 10.1055/a-1676-402   | [Secondary Use of El      | J. Hauswaldt;    | Hauswaldt J   | Gesundheitsw      | 2021             |
| 10.1002/pds.4836     | A European multicent      | K. Hedenmalm;    | Hedenmalm K   | Pharmacoepid      | 2019             |
| 10.1007/s00228-019   | Effect of withdrawal      | K. Hedenmalm;    | Hedenmalm K   | Eur J Clin Phar   | 2019             |

|    |                       |                         |                  |               |                  |
|----|-----------------------|-------------------------|------------------|---------------|------------------|
| 1  |                       |                         |                  |               |                  |
| 2  | 10.1007/s00228-018    | Prescribing patterns of | K. Hedenmalm     | Hedenmalm K   | Eur J Clin Phar  |
| 3  | 10.1007/s40264-021    | Is There an Increased   | K. Hedenmalm     | Hedenmalm K   | Drug Saf         |
| 4  | 10.5414/cp204177      | Association between     | J. Heidemann     | Heidemann J   | Int J Clin Pharr |
| 5  | 10.1111/jog.12384     | Use of antidiabetic ag  | C. Heilmaier     | Heilmaier C   | J Obstet Gyna    |
| 6  | 10.3390/antibiotics1  | Treatment of Urinary    | M. Höller; H. S  | Höller M      | Antibiotics (Ba  |
| 7  | 10.1055/s-2003-376    | Versorgungsforschun     | E. Hummers-P     | Hummer-Prad   | Das Gesundhe     |
| 8  | 10.1055/s-0029-124    | Umsetzung von diagn     | E. Hummers-P     | Hummer-Prad   | Deutsche Mec     |
| 9  | 10.1055/s-2006-924    | Incremental prescrip    | A. Icks; B. Haa  | Icks A        | Exp Clin Endoc   |
| 10 | 10.5414/cpp45516      | Cost comparison anal    | A. Icks; B. Haa  | Icks A        | Int J Clin Pharr |
| 11 | 10.1007/s00432-015    | Cancer is associated    | L. Jacob; K. Ko  | Jacob L       | Journal of can   |
| 12 | 10.1007/s00432-015    | Prevalence of depres    | L. Jacob; L. Ble | Jacob L       | J Cancer Res C   |
| 13 | 10.3205/000229        | Gender-based differ     | L. Jacob; K. Ko  | Jacob L       | Ger Med Sci      |
| 14 | 10.1016/j.jdiacomp    | Impact of metformin     | L. Jacob; K. Ko  | Jacob L       | J Diabetes Cor   |
| 15 | 10.3205/000233        | Impact of caesarean     | L. Jacob; S. Ta  | Jacob L       | Ger Med Sci      |
| 16 | 10.1007/s00404-016    | Caesarean section an    | L. Jacob; K. We  | Jacob L       | Arch Gynecol     |
| 17 | 10.5414/cp202729      | Prescription patterns   | L. Jacob; J. Bo  | Jacob L       | Int. Journal of  |
| 18 | 10.5414/cp202754      | Risk of dementia in G   | L. Jacob; J. Bo  | Jacob L       | Int J Clin Pharr |
| 19 | 10.1016/j.yebeh.201   | Incidence of epilepsy   | L. Jacob; J. Bo  | Jacob L       | Epilepsy &am     |
| 20 | 10.1007/s00296-018    | Persistence with bio    | L. Jacob; T. Ch  | Jacob L       | Rheumatol Int    |
| 21 | 10.1016/j.jad.2019.0  | Association between     | L. Jacob; C. Ge  | Jacob L       | J Affect Disord  |
| 22 | 10.3389/fmed.2021.    | Impact of the COVID-    | M. S. Jördens    | Jördens MS    | Front Med (La    |
| 23 | 10.1097/aog.000000    | Discontinuation of tr   | M. Kalder; K. F  | Kalder M      | Obstet Gynec     |
| 24 | 10.1055/s-0034-139    | Pregnancy after brea    | N. Kalousidou    | Kalousidou N  | Z Geburtshilfe   |
| 25 | 10.1515/jpem-2016     | Prevalence of medica    | T. M. Kapellen   | Kapellen TM   | J Pediatr Endo   |
| 26 | 10.1177/205064062     | Non-alcoholic fatty liv | L. Kaps; C. Lab  | Kaps L        | United Europe    |
| 27 | 10.3390/antibiotics1  | Prevalence of and Fa    | W. V. Kern; K.   | Kern WV       | Antibiotics (Ba  |
| 28 | 10.1055/s-0030-124    | Routinedaten aus ha     | M. Kersting; A.  | Kersting M    | Das Gesundhe     |
| 29 | 10.1055/s-0032-131    | Modellierung von An     | M. Kersting; J.  | Kersting M    | Gesundheitsw     |
| 30 | 10.1038/s41533-022    | Age- and gender-base    | S. J. Kim-Dorn   | Kim-Dorner S  | NPJ Prim Care    |
| 31 | 10.1007/s13300-016    | Microvascular Outco     | W. M. Kolaczy    | Kolaczynski W | Diabetes Ther    |
| 32 | 10.1017/s104161021    | Depression risk in pat  | M. Konrad; J.    | Konrad M      | International E  |
| 33 | 10.5414/cp202591      | Treatment of depress    | M. Konrad; L.    | Konrad M      | Int J Clin Pharr |
| 34 | 10.1016/j.jad.2020.0  | Increased prevalence    | M. Konrad; K.    | Konrad M      | Journal of Affe  |
| 35 | 10.1055/s-0029-124    | Implementation of re    | K. Korb; E. Hu   | Korb K        | Deutsche Mec     |
| 36 | 10.1016/j.pcd.2012.0  | Predictors for the ini  | K. Kostev; F. V  | Kostev K      | Prim Care Dial   |
| 37 | 10.12968/jowc.2012    | Risk of diabetic foot   | K. Kostev; F. V  | Kostev K      | J Wound Care     |
| 38 | 10.1177/193229681     | Resource Consumptio     | K. Kostev; F.-V  | Kostev K      | Journal of Dial  |
| 39 | 10.5414/cp201969      | Adherence in tamoxif    | K. Kostev; U. N  | Kostev K      | Int. Journal of  |
| 40 | 10.5414/cp201912      | Frequency of hospita    | K. Kostev; U. N  | Kostev K      | Int J Clin Pharr |
| 41 | 10.1016/j.pcd.2013.0  | Influence of macro- a   | K. Kostev; W.    | Kostev K      | Primary Care E   |
| 42 | 10.1016/j.jval.2013.0 | Risk of Psychiatric an  | K. Kostev; J. R  | Kostev K      | Value in Healt   |
| 43 | 10.1177/193229681     | Predictors of Insulin   | K. Kostev; F.-V  | Kostev K      | Journal of Dial  |
| 44 | 10.1016/j.pcd.2013.1  | Predictors of hypogly   | K. Kostev; F.-V  | Kostev K      | Primary Care E   |
| 45 | 10.1016/j.pcd.2014.0  | Prevalence and risk fa  | K. Kostev; A. J  | Kostev K      | Primary Care E   |
| 46 | 10.3205/000200        | Which adverse effect    | K. Kostev; J. R  | Kostev K      | Ger Med Sci      |
| 47 | 10.3205/000188        | Physicians' influence   | K. Kostev; L. W  | Kostev K      | Ger Med Sci      |
| 48 | 10.2147/dms0.S768     | Glycemic control afte   | K. Kostev; F. V  | Kostev K      | Diabetes Meta    |
| 49 | 10.3205/000205        | Risk of hypoglycaemi    | K. Kostev; F. V  | Kostev K      | Ger Med Sci      |
| 50 | 10.1016/j.pcd.2014.0  | Effects of selected an  | K. Kostev; J. R  | Kostev K      | Prim Care Dial   |
| 51 | 10.1185/03007995.2    | Persistence with opio   | K. Kostev; F. V  | Kostev K      | Current Medic    |

1  
2  
3  
4  
5  
6  
7  
8  
9  
10  
11  
12  
13  
14  
15  
16  
17  
18  
19  
20  
21  
22  
23  
24  
25  
26  
27  
28  
29  
30  
31  
32  
33  
34  
35  
36  
37  
38  
39  
40  
41  
42  
43  
44  
45  
46  
47  
48  
49  
50  
51  
52  
53  
54  
55  
56  
57  
58  
59  
60

|                      |                         |                  |                |                 |      |
|----------------------|-------------------------|------------------|----------------|-----------------|------|
| 10.1097/xce.000000   | Prevalence of high-risk | K. Kostev; K. G  | Kostev K       | Cardiovasc En   | 2017 |
| 10.1177/1932296816   | Changes in Glycemic     | K. Kostev; S. P  | Kostev K       | Journal of Dial | 2017 |
| 10.1177/1932296816   | Prescription Patterns   | K. Kostev; T. R  | Kostev K       | J Diabetes Sci  | 2018 |
| 10.1177/1932296816   | Time to Insulin Initiat | K. Kostev; S. G  | Kostev K       | Journal of Dial | 2019 |
| 10.5414/cp203851     | Prevalence and assoc    | K. Kostev; M. S  | Kostev K       | Int. Journal of | 2021 |
| 10.1007/s00787-021   | Increase in depressio   | K. Kostev; K. V  | Kostev K       | Eur Child Adol  | 2021 |
| 10.1016/j.yebeh.202  | Predicting the risk of  | K. Kostev; T. V  | Kostev K       | Epilepsy Beha   | 2021 |
| 10.1093/ofid/ofac33  | Prevalence of and Fac   | K. Kostev; L. S  | Kostev K       | Open Forum In   | 2022 |
| 10.1080/00325481.2   | Association between     | K. Kostev; A. V  | Kostev K       | Postgrad Med    | 2022 |
| 10.2337/dc14-0977    | Are Sulfonylurea and    | B. Kowall; W. K  | Kowall B       | Diabetes Care   | 2014 |
| 10.1016/j.diabres.20 | Effects of the COVID-   | B. Kowall; K. K  | Kowall B       | Diabetes Res C  | 2021 |
| 10.1111/dme.14852    | Effects of the COVID-   | B. Kowall; K. K  | Kowall B       | Diabet Med      | 2022 |
| 10.1371/journal.pon  | Antibiotic prescribing  | E. M. Kraus; S.  | Kraus EM       | PLoS ONE [Ele   | 2017 |
| 10.5414/cp201653     | Micro- and macrovas     | S. Kress; K. Ko  | Kress S        | Int. Journal of | 2012 |
| 10.1016/j.zefq.2008  | Diagnosehäufigkeiten    | C. Kruschinski;  | Kruschinski C  | Zeitschrift fur | 2008 |
| 10.1055/s-0029-124   | (Hospital referrals fr  | T. Kuhlein; G.   | Kuhlein T      | Gesundheitsw    | 2011 |
| 10.1517/14656566.2   | Benzodiazepine disco    | D. Kunz; S. Bin  | Kunz D         | Expert Opin P   | 2012 |
| 10.3389/fneur.2021   | Clinical Features Obs   | M. J. Kwasny;    | Kwasny MJ      | Front Neurol    | 2021 |
| 10.1007/s00198-014   | Differences in persist  | I. Kyvernitakis; | Kyvernitakis I | Osteoporosis    | 2014 |
| 10.3109/13697137.2   | Discontinuation rates   | I. Kyvernitakis; | Kyvernitakis I | Climacteric     | 2015 |
| 10.3109/13697137.2   | Persistency with estr   | I. Kyvernitakis; | Kyvernitakis I | Climacteric     | 2015 |
| 10.1007/s00198-016   | The impact of depot     | I. Kyvernitakis; | Kyvernitakis I | Osteoporos In   | 2017 |
| 10.1007/s00198-018   | The tamoxifen parad     | I. Kyvernitakis; | Kyvernitakis I | Osteoporos In   | 2018 |
| 10.1007/s00198-020   | Effect of progestogen   | I. Kyvernitakis; | Kyvernitakis I | Osteoporos In   | 2020 |
| 10.1097/md.000000    | Proton pump inhibit     | C. Labenz; K. K  | Labenz C       | Medicine        | 2020 |
| 10.1111/apt.16008    | Proton pump inhibit     | C. Labenz; M.    | Labenz C       | Aliment Pharm   | 2020 |
| 10.1002/ueg2.12124   | Impact of thyroid dise  | C. Labenz; K. K  | Labenz C       | United Europe   | 2021 |
| 10.1007/s10620-020   | Incident Dementia in    | C. Labenz; K. K  | Labenz C       | Dig Dis Sci     | 2021 |
| 10.1055/a-1378-467   | Impact of Non-Alcoho    | C. Labenz; K. K  | Labenz C       | Exp Clin Endoc  | 2022 |
| 10.1055/a-1676-482   | Prescription rates of   | C. Labenz; K. K  | Labenz C       | Z Gastroenter   | 2022 |
| 10.1016/j.yebeh.202  | Manufacturer switch     | J. D. Lang; K. K | Lang JD        | Epilepsy Beha   | 2021 |
| 10.14236/jhi.v13i4.6 | The CONTENT project     | G. Laux; T. Ko   | Laux G         | Informatics in  | 2005 |
| 10.1055/s-2007-976   | Detailed data collect   | G. Laux; T. Ro   | Laux G         | Gesundheitsw    | 2007 |
| 10.1186/1472-6963-   | Co- and multimorbid     | G. Laux; T. Ku   | Laux G         | BMC Health Se   | 2008 |
| 10.1007/s00063-009   | [Antihypertensive ph    | G. Laux; J. Sze  | Laux G         | Medizinische f  | 2009 |
| 10.1016/j.zefq.2010  | [Using routine data f   | G. Laux; M. Ne   | Laux G         | Zeitschrift fur | 2011 |
| 10.1186/s12875-016   | Prescribing difference  | G. Laux; S. Ber  | Laux G         | BMC Family Pr   | 2016 |
| 10.1371/journal.pon  | Differences between     | G. Laux; B. Mu   | Laux G         | PLoS ONE [Ele   | 2016 |
| 10.1111/ejh.12776    | Epidemiology of iron    | M. Levi; M. Ro   | Levi M         | European Jour   | 2016 |
| 10.1055/s-0043-108   | [Health Science Rese    | H. Lingner; I. A | Lingner H      | Gesundheitsw    | 2018 |
| 10.1016/j.rmed.202   | Oral corticosteroid pr  | M. Lommatzsch    | Lommatzsch M   | Respiratory M   | 2021 |
| 10.1136/bmjdr-202    | Variables associated    | S. H. Loosen;    | Loosen S       | BMJ Open Dia    | 2021 |
| 10.3390/jcm1024591   | Incidence of Cancer i   | S. H. Loosen;    | Loosen S       | J Clin Med      | 2021 |
| 10.1007/s00432-021   | Low blood levels of h   | S. H. Loosen;    | Loosen S       | J Cancer Res C  | 2021 |
| 10.1007/s00384-021   | Diverticular disease i  | S. H. Loosen;    | Loosen S       | Int J Colorecta | 2021 |
| 10.1055/a-1482-923   | Non-alcoholic fatty li  | S. H. Loosen;    | Loosen S       | Z Gastroenter   | 2021 |
| 10.1097/meg.000000   | An elevated FIB-4 sco   | S. Loosen; M.    | Loosen S       | Eur J Gastroen  | 2022 |
| 10.3390/vaccines10   | Factors Associated wi   | S. H. Loosen;    | Loosen S       | Vaccines (Base  | 2022 |
| 10.1007/s15010-022   | Obesity and lipid met   | S. H. Loosen;    | Loosen S       | Infection       | 2022 |
| 10.1016/j.ejca.2022  | An elevated FIB-4 sco   | S. H. Loosen;    | Loosen S       | Eur J Cancer    | 2022 |

|    |                       |                         |                   |               |                  |
|----|-----------------------|-------------------------|-------------------|---------------|------------------|
| 1  |                       |                         |                   |               |                  |
| 2  | 10.1186/s12876-022    | Overlap between irrit   | S. H. Loosen; K   | Loosen S      | BMC Gastroen     |
| 3  | 10.1038/s41598-022    | The spectrum of com     | S. H. Loosen; C   | Loosen S      | Sci Rep          |
| 4  | 10.3390/cancers140    | Overweight and Obes     | S. H. Loosen; C   | Loosen S      | Cancers (Base    |
| 5  | 10.1007/s00296-015    | Treatment persistenc    | R. Lyu; M. Gov    | Lyu R         | Rheumatol Int    |
| 6  | 10.5414/CP202003      | Drug-disease interact   | P. Mand; K. R     | Mand P        | International J  |
| 7  | 10.1080/00325481.2    | Reduced antibiotic us   | D. Martin; M.     | Martin D      | Postgrad Med     |
| 8  | 10.5414/cpp48173      | Relation of the first h | J. Mathes; K. K   | Mathes J      | Int J Clin Pharm |
| 9  | 10.1186/s13223-015    | Allergy immunothera     | A. L. McDonell    | McDonnell AL  | Allergy Asthm    |
| 10 | 10.1007/s15006-017    | Schlaganfallprophyla    | U. Mergentha      | Mergenthaler  | MMW - Fortsc     |
| 11 | 10.1007/s40261-018    | Indications for System  | D. R. Morales;    | Morales DR    | Clinical Drug I  |
| 12 | 10.1007/s40744-016    | Disease Control, Heal   | R. Morlock; P.    | Morlock R     | Rheumatol Th     |
| 13 | 10.1016/j.jpsychires. | Age effects on treatm   | H. Mössinger;     | Mössinger H   | J Psychiatr Res  |
| 14 | 10.1016/j.yebeh.202   | The impact of the cor   | T. M. Mueller;    | Mueller TM    | Epilepsy &am     |
| 15 | 10.1024/0301-1526/    | Increased health care   | U. Muller-Buh     | Muller-Buhl U | Vasa             |
| 16 | 10.1024/0301-1526/    | Varicose veins are a r  | U. Muller-Buh     | Muller-Buhl U | Vasa             |
| 17 | 10.1055/s-0037-162    | Prävalenz, lokale Kon   | U. Müller-Büh     | Muller-Buhl U | Phlebologie      |
| 18 | 10.1111/j.1742-481    | Xpenditure of chron     | U. Muller-Buh     | Muller-Buhl U | International V  |
| 19 | 10.1080/02770903.2    | German regional vari    | C. Nan; O. Sch    | Nan C         | J Asthma         |
| 20 | 10.1007/s12325-016    | Comorbidity Burden      | F. Nyberg; L. H   | Nyberg F      | Adv Ther         |
| 21 | 10.1016/j.zefq.2018.  | [Estimating the incid   | C. Ohlmeier; F.   | Ohlmeier C    | Z Evid Fortbild  |
| 22 | 10.1080/00016489.2    | Current healthcare pa   | J. J.-H. Park; C  | Park JJH      | Acta Oto-Lary    |
| 23 | 10.4193/Rhin18.055    | Medication use in pat   | J. J. H. Park; D  | Park JJH      | Rhinology        |
| 24 | 10.1016/j.jpeds.2008  | Antiemetic medicatio    | N. Pfeil; U. Uh   | Pfeil N       | J Pediatr        |
| 25 | 10.5414/cpp48761      | Different persistence   | M. Pfohl; F. W    | Pfohl M       | Int J Clin Pharm |
| 26 | 10.1002/pds.4575      | Anticholinergic and se  | A. Phillips; R. S | Phillips A    | Pharmacoepid     |
| 27 | 10.1016/j.pcd.2012.   | Amputation rate and     | S. Pscherer; F.   | Pscherer S    | Primary Care E   |
| 28 | 10.1016/j.pcd.2015.   | Treatment persistenc    | S. Pscherer; E.   | Pscherer S    | Primary Care E   |
| 29 | 10.2147/dms0.S1013    | Fracture risk in patie  | S. Pscherer; K.   | Pscherer S    | Diabetes Meta    |
| 30 | 10.1177/193229681     | Treatment Outcomes      | Q. Qiao; K. Jo    | Qiao Q        | Journal of Dial  |
| 31 | 10.1007/s41030-020    | Development and Val     | J. K. Quint; C.   | Quint JK      | Pulm Ther        |
| 32 | 10.1055/s-2007-972    | Prescription of Insulin | W. Rathmann;      | Rathmann W    | Experimental     |
| 33 | 10.1111/dom.12035     | Lower incidence of re   | W. Rathmann;      | Rathmann W    | Diabetes, Obe    |
| 34 | 10.1177/193229681     | Different injection fre | W. Rathmann;      | Rathmann W    | J Diabetes Sci   |
| 35 | 10.1055/s-0033-136    | Macro- and Microvas     | W. Rathmann;      | Rathmann W    | Experimental     |
| 36 | 10.1016/j.jdiacomp.   | Fracture risk in patie  | W. Rathmann;      | Rathmann W    | J Diabetes Cor   |
| 37 | 10.5414/cp202906      | Regional differences    | W. Rathmann;      | Rathmann W    | Int J Clin Pharm |
| 38 | 10.1016/j.jdiacomp.   | Association of dipept   | W. Rathmann;      | Rathmann W    | J Diabetes Cor   |
| 39 | 10.5414/cp203320      | Basic characteristics   | W. Rathmann;      | Rathmann W    | Int. Journal of  |
| 40 | 10.1111/1753-0407.    | Association of charac   | W. Rathmann;      | Rathmann W    | Journal of Dial  |
| 41 | 10.1016/j.psychres.   | Increased depression    | W. Rathmann;      | Rathmann W    | Psychiatry Res   |
| 42 | 10.1080/00325481.2    | Changes in patient ch   | W. Rathmann;      | Rathmann W    | Postgraduate     |
| 43 | 10.1007/s00125-022    | Incidence of newly di   | W. Rathmann;      | Rathmann W    | Diabetologia     |
| 44 | 10.5414/cp202230      | Association of time-t   | J. P. Reese; H.   | Reese JP      | Int J Clin Pharm |
| 45 | 10.1002/pds.2250      | How frequently are c    | U. Richarz; A.    | Richarz U     | Pharmacoepid     |
| 46 | 10.3390/cancers130    | Cancer Patients Have    | C. Roderburg;     | Roderburg C   | Cancers (Base    |
| 47 | 10.1097/meg.00000     | Nonalcoholic fatty liv  | C. Roderburg;     | Roderburg C   | Eur J Gastroen   |
| 48 | 10.1007/s00432-022    | Antibiotic therapy is   | a. C. Roderburg;  | Roderburg C   | J Cancer Res C   |
| 49 | 10.1016/j.jpsychores. | Diagnosing somatisat    | R. Schaefer; C    | Schaefer R    | Journal of Psy   |
| 50 | 19742279 (PMID)       | Psychosocial determi    | M. Scherer; W     | Scheerer MF   | GMS Psycho-S     |
| 51 | 10.2147/dms0.S116     | Changes in HbA1c, bc    | M. F. Scheere     | Scheerer MF   | Diabetes Meta    |

1  
2  
3  
4  
5  
6  
7  
8  
9  
10  
11  
12  
13  
14  
15  
16  
17  
18  
19  
20  
21  
22  
23  
24  
25  
26  
27  
28  
29  
30  
31  
32  
33  
34  
35  
36  
37  
38  
39  
40  
41  
42  
43  
44  
45  
46  
47  
48  
49  
50  
51  
52  
53  
54  
55  
56  
57  
58  
59  
60

|                       |                             |                                 |                |                  |      |
|-----------------------|-----------------------------|---------------------------------|----------------|------------------|------|
| 10.20524/aog.2016.0   | Do patients with lactate... | R. Schiffner; K. Schiffner R    | Schiffner R    | Ann Gastroent    | 2016 |
| 10.1080/03007995.2    | Patient characteristics...  | N. C. Schloot; Schloot NC       | Schloot NC     | Current Medic    | 2020 |
| 10.3390/jcm1108221    | An Elevated FIB-4 Scor...   | D. Schöler; K. Schöler D        | Schöler D      | J Clin Med       | 2022 |
| 10.1016/j.yebeh.202   | Usage of antiepileptic...   | J. Scholten; H. Scholten J      | Scholten J     | Epilepsy &amp    | 2020 |
| 10.5414/cpp40317      | Lipid-lowering therap...    | D. Schroder-B; Schroder-Berr    | Schroder-Berr  | International J  | 2002 |
| 10.5414/cpp42581      | Off-label use of prota...   | D. Schröder-B; Schroder-Berr    | Schroder-Berr  | Int. Journal of  | 2004 |
| 10.1177/014556132     | Incidence of Inner Ea...    | D. U. Seidel; S. Seidel DU      | Seidel DU      | Ear Nose Thro    | 2021 |
| 10.1055/s-0030-124    | [Secondary data for b...    | J. Sindern; D. Sindern J        | Sindern J      | Gesundheitsw     | 2010 |
| 10.1016/j.clinthera.2 | Equipotent doses of t...    | R. Sittl; R. Lika; Sittl R      | Sittl R        | Clin Ther        | 2005 |
| 10.1016/j.clinthera.2 | Changes in the prescr...    | R. Sittl; M. Nu; Sittl R        | Sittl R        | Clin Ther        | 2005 |
| 10.1016/j.clinthera.2 | Patterns of dosage ch...    | R. Sittl; M. Nu; Sittl R        | Sittl R        | Clin Ther        | 2006 |
| 10.1055/s-2007-993    | [Home visits in Germ...     | E. A. Snijder; N. Snijder EA    | Snijder EA     | Gesundheitsw     | 2007 |
| 10.1055/s-0033-134    | Verwendung von Off...       | D. Sonntag; D. Sonntag D        | Sonntag D      | DMW - Deuts      | 2013 |
| 10.1007/s00415-020    | Anti-seizure medicati...    | J. Stritzelberg; Stritzelberger | Stritzelberger | J Neurol         | 2021 |
| 10.1007/s00198-020    | Incidence of fractures...   | U. Stumpf; P. Stumpf U          | Stumpf U       | Osteoporosis     | 2020 |
| 10.1016/j.jbo.2020.1  | Influence of chemoth...     | U. Stumpf; K. Stumpf U          | Stumpf U       | J Bone Oncol     | 2020 |
| 10.1007/s00432-019    | Increased risk for can...   | C. Tanislav; C. Tanislav C      | Tanislav C     | J Cancer Res C   | 2019 |
| 10.1159/000503562     | Late Detection of Atri...   | C. Tanislav; K. Tanislav C      | Tanislav C     | European Neu     | 2019 |
| 10.1007/s00198-020    | Factors associated wi...    | C. Tanislav; K. Tanislav C      | Tanislav C     | Osteoporosis     | 2020 |
| 10.1016/j.puhe.2021   | Investigation of the p...   | C. Tanislav; K. Tanislav C      | Tanislav C     | Public Health    | 2022 |
| 10.1016/j.jad.2021.0  | Association between F...    | F. Teichgräber; Teichgräber F   | Teichgräber F  | J Affect Disord  | 2021 |
| 10.1007/BF0326196     | Safety assessment of J...   | J. E. Tyczynski; Tyczynski JE   | Tyczynski JE   | Drug Safety      | 2012 |
| 10.1111/dom.13977     | Changes in the utilizat...  | L. van den Boe; van den Boom    | van den Boom   | Diabetes, Obe    | 2020 |
| 10.1016/j.pcd.2020.0  | Prevalence of urinary...    | L. van den Boe; van den Boom    | van den Boom   | Prim Care Dial   | 2021 |
| 10.1177/193229682     | Multimorbidity Amon...      | L. van den Boe; van den Boom    | van den Boom   | J Diabetes Sci   | 2022 |
| 10.1186/1471-2458-8   | Drug utilization patte...   | A. Volodina; T. Volodina A      | Volodina A     | BMC Public He    | 2011 |
| 10.5414/cp201665      | A retrospective datab...    | T. Voshaar; K. Voshaar T        | Voshaar T      | Int J Clin Pharm | 2012 |
| 10.1080/00325481.2    | Early insights into the...  | R. Wachter; D. Wachter R        | Wachter R      | Postgraduate     | 2018 |
| 10.1002/ehf2.12768    | Heart failure signs an...   | R. Wachter; S. Wachter R        | Wachter R      | ESC heart failu  | 2020 |
| 10.5414/cp201284      | Antihypertensive treat...   | G. Wagner; A. Wagner G          | Wagner G       | Int. Journal of  | 2012 |
| 10.5414/cp202040      | Impact of comorbidity...    | A. Werner-Bu; Werner-Busse      | Werner-Busse   | Int. Journal of  | 2014 |
| 10.1177/193229681     | Risk of Nonfatal Strok...   | S. Wiefarn; C. Wiefarn S        | Wiefarn S      | J Diabetes Sci   | 2017 |
| 10.1055/s-0043-104    | Einfluss des Disease-S...   | S. Wiefarn; K. Wiefarn S        | Wiefarn S      | DMW - Deuts      | 2017 |
| 10.1111/ddg.12089     | Prevalence and treatm...    | M. Worm; H. Worm M              | Worm M         | JDDG: Journal    | 2013 |
| 10.1186/s12931-021    | Prevalence of overuse...    | H. Worth; C. Worth H            | Worth H        | Respiratory Re   | 2021 |
| 10.1016/j.clinthera.2 | Antidiabetic prescrip...    | N. Yurgin; K. Yurgin N          | Yurgin N       | Clin Ther        | 2007 |
| 10.1016/j.jpag.2013   | The prescribing of co...    | M. Ziller; A. Ziller M          | Ziller M       | J Pediatr Adole  | 2013 |
| 10.1007/s00404-013    | Risk of venous thromb...    | M. Ziller; V. Ziller M          | Ziller M       | Arch Gynecol     | 2014 |
| 10.3109/09513590.2    | Prevalence of female...     | V. Ziller; P. Ziller V          | Ziller V       | Gynecol Endoc    | 2013 |
| 10.1007/s00404-014    | Time to pregnancy in...     | V. Ziller; C. Ziller V          | Ziller V       | Arch Gynecol     | 2015 |
| 10.2147/ceor.S2315    | The role of galenic in...   | Y. Zoellner; M. Zoellner Y      | Zoellner Y     | Clinicoecon O    | 2011 |
| 10.1007/s00103-023    | [BeoNet-Halle—deve...       | K. Moser; R. Moser K            | Moser K        | Bundesgesund     | 2023 |



| project       | type of resear | subject area   | sample of pub  | ICD-10 catego  | main medicati                | study design   |
|---------------|----------------|----------------|----------------|----------------|------------------------------|----------------|
| Disease Analy | Applied studie | Pharmacoecon   | Treatment-re   | Diseases of th | Budesonide/F                 | Cohort         |
| Disease Analy | Applied studie | General epide  | Incidence and  | Diseases of th | -                            | Cohort         |
| RADARplus     | Methodologic   | Database-spe   | Project Descri | Not Applicabl  | -                            | Methodologic   |
| Disease Analy | Applied studie | Pharmacoecon   | Treatment-re   | Mental and be  | SSRIs(Escitalo               | Case-Control   |
| Disease Analy | Applied studie | Validation stu | EHR Database   | Multiple Disea | -                            | Cohort         |
| Disease Analy | Applied studie | Pharmacoecon   | Prescription P | Diseases of th | Mometasone                   | Retrospective  |
| Disease Analy | Applied studie | Pharmacoecon   | Incidence and  | Mental and be  | Antipsychotic                |                |
| Disease Analy | Applied studie | General epide  | Incidence and  | Mental and be  | Anti-Dementia                | Case-Control   |
| Disease Analy | Applied studie | General epide  | Incidence and  | Mental and be  | -                            | Cohort         |
| Disease Analy | Applied studie | General epide  | Diagnosis Stud | Mental and be  | -                            | Case-Control   |
| Disease Analy | Applied studie | Pharmacoecon   | Treatment-re   | Mental and be  | Neuroleptics                 | cohort         |
| Disease Analy | Applied studie | Pharmacoecon   | Prescription P | Mental and be  | -                            | Cohort         |
| Disease Analy | Applied studie | Health Service | Diagnosis Stud | Diseases of th | -                            | Case-Control   |
| Disease Analy | Applied studie | Pharmacoecon   | Treatment-re   | Mental and be  | Antidepressan                | Cohort         |
| Disease Analy | Applied studie | General epide  | Risk & Comor   | Mental and be  | -                            | Case-Control   |
| Disease Analy | Applied studie | Pharmacoecon   | Treatment-re   | Diseases of th | -                            | Cohort         |
| Disease Analy | Applied studie | Pharmacoecon   | Prescription P | Multiple Disea | Opioids (Code                | Cohort         |
| Disease Analy | Applied studie | General epide  | Treatment-re   | Multiple Disea | -                            | Cross-sectiona |
| Disease Analy | Applied studie | Pharmacoecon   | Treatment-re   | Diseases of th | Apixaban                     | Case-Control   |
| Disease Analy | Applied studie | Pharmacoecon   | Prescription P | Diseases of th | Oral Anticoagi               | Cohort         |
| Disease Analy | Applied studie | Pharmacoecon   | Incidence and  | Diseases of th | Angiotensin li               | Cohort         |
| Disease Analy | Applied studie | Pharmacoecon   | Prescription P | Diseases of th | Macrolide (Azi-/ Clarithromy |                |
| Disease Analy | Applied studie | General epide  | Risk & Comor   | Diseases of th | -                            | cohort         |
| Disease Analy | Applied studie | General epide  | Risk & Comor   | Diseases of th | -                            | cohort         |
| Disease Analy | Applied studie | General epide  | Risk & Comor   | Mental and be  | -                            | Case-Control   |
| Disease Analy | Applied studie | General epide  | Incidence and  | Mental and be  | -                            | Case-Control   |
| Disease Analy | Applied studie | Pharmacoecon   | Prescription P | Mental and be  | Antidepressan                | Case-Control   |
| Disease Analy | Applied studie | Pharmacoecon   | Prescription P | Diseases of th | -                            | Cohort         |
| Disease Analy | Applied studie | Pharmacoecon   | Prescription P | Multiple Disea | Azm (Azilsarta               | Cohort         |
| CONTENT       | Applied studie | Pharmacoecon   | Prescription P | Neoplasms      | Analgesics An                | Cross-sectiona |
| Disease Analy | Applied studie | Pharmacoecon   | Prescription P | Diseases of th | Moderate-/Hi                 | cohort         |
| Disease Analy | Applied studie | General epide  | Incidence and  | Diseases of th | -                            | Cross-sectiona |
| Disease Analy | Applied studie | Pharmacoecon   | Treatment-re   | Diseases of th | -                            | cohort         |
| Disease Analy | Applied studie | Pharmacoecon   | Risk & Comor   | Diseases of th | Oral Bisphosp                | Cohort         |
| Disease Analy | Applied studie | Pharmacoecon   | Treatment-re   | Neoplasms      | Tamoxifen (Ta                | Cohort         |
| Disease Analy | Applied studie | Pharmacoecon   | Treatment-re   | Neoplasms      | Bisphosphona                 | Cohort         |
| Disease Analy | Applied studie | Pharmacoecon   | Prescription P | Diseases of th | Antiepileptic                | Cross-sectiona |
| Disease Analy | Applied studie | Pharmacoecon   | Prescription P | Diseases of th | Antiepileptic                | Cross-sectiona |
| Disease Analy | Applied studie | Pharmacoecon   | Prescription P | Endocrine, nu  | Dapagliflozin                | Cross-sectiona |
| Disease Analy | Applied studie | Pharmacoecon   | Prescription P | Diseases of th | Antihypertens                | Cohort         |
| MedVip        | Applied studie | Health service | Health Service | Diseases of th | -                            | Cross-sectiona |
| MedVip        | Applied studie | Health service | Health Service | Multiple Disea | -                            | Cross-sectiona |
| MedVip        | Methodologic   | Generalizable  | Health Service | Not Applicabl  | -                            | Cross-sectiona |
| MedVip        | Applied studie | Health service | Health Service | Neoplasms      | -                            | Case-Control   |
| RADARplus     | Methodologic   | Generalizable  | Data Collectio | Not Applicabl  | -                            | Methodologic   |
| RADARplus     | Methodologic   | Generalizable  | Data Collectio | Not Applicabl  | -                            | Methodologic   |
| RADARplus     | Methodologic   | Database-spe   | Data Collectio | Not Applicabl  | -                            | methodologic   |
| Disease Analy | Applied studie | Pharmacoecon   | Prescription P | Diseases of th | Antibiotics                  | Cohort         |
| Disease Analy | Applied studie | Pharmacoecon   | Prescription P | Diseases of th | Codeine                      | Cohort         |

1

2

3

4

5

6

7

8

9

10

11

12

13

14

15

16

17

18

19

20

21

22

23

24

25

26

27

28

29

30

31

32

33

34

35

36

37

38

39

40

41

42

43

44

45

46

47

48

49

50

51

52

53

54

55

56

57

58

59

60

|               |                |                |                 |                               |                 |                |
|---------------|----------------|----------------|-----------------|-------------------------------|-----------------|----------------|
| Disease Analy | Applied studie | Pharmacoecon   | Prescription P  | Symptoms, sig                 | Tramadol        | Cohort         |
| Disease Analy | Applied studie | Pharmacoecon   | Risk & Comor    | Diseases of th                | Metamizole      | cohort         |
| Disease Analy | Applied studie | Pharmacoecon   | Risk & Comor    | Diseases of th                | -               | Case-Control   |
| Disease Analy | Applied studie | Pharmacoecon   | Prescription P  | Endocrine, nu                 | Insulin         | Cohort         |
| Disease Analy | Applied studie | Pharmacoecon   | Prescription P  | Diseases of th                | Capnephron      | Cohort         |
| MedVip        | Methodologic   | Generalizable  | Data Collectio  | Not Applicabl                 | -               | Methodologic   |
| MedVip        | Applied studie | Health service | Quality of Care | Diseases of th                | Cardiovascula   | Cross-sectiona |
| Disease Analy | Applied studie | Pharmacoecon   | Prescription P  | Endocrine, nu                 | -               | Case-Control   |
| Disease Analy | Applied studie | Pharmacoecon   | Prescription P  | Endocrine, nu                 | pentaerythrit   | Cohort         |
| Disease Analy | Applied studie | General epide  | Risk & Comor    | Neoplasms                     | -               | Case-Control   |
| Disease Analy | Applied studie | General epide  | Incidence and   | Neoplasms                     | -               | Cohort         |
| Disease Analy | Applied studie | Pharmacoecon   | Prescription P  | Mental and be                 | SSRIs           | Retrospective  |
| Disease Analy | Applied studie | Pharmacoecon   | Treatment-re    | Neoplasms                     | Metformin       | Cohort         |
| Disease Analy | Applied studie | Health Service | Obstetrics and  | Pregnancy, ch                 | -               | Case-Control   |
| Disease Analy | Applied studie | Health Service | Obstetrics and  | Pregnancy, ch                 | -               | cohort         |
| Disease Analy | Applied studie | Pharmacoecon   | Prescription P  | Mental and be                 | -               | Cohort         |
| Disease Analy | Applied studie | Pharmacoecon   | Risk & Comor    | Mental and be                 | Antidepressan   | Cohort         |
| Disease Analy | Applied studie | General epide  | Incidence and   | Diseases of th                | -               | Case-Control   |
| Disease Analy | Applied studie | Pharmacoecon   | Treatment-re    | Diseases of th                | 13 Different B  | Retrospective  |
| Disease Analy | Applied studie | General epide  | Risk & Comor    | Pregnancy, ch                 | -               | Case-Control   |
| Disease Analy | Applied studie | Health Service | Health Service  | Not Applicabl                 | -               |                |
| Disease Analy | Applied studie | Pharmacoecon   | Prescription P  | Diseases of th                | Darifenacin, F  | Retrospective  |
| Disease Analy | Applied studie | General epide  | Obstetrics and  | Neoplasms                     | -               | Retrospective  |
| Disease Analy | Applied studie | General epide  | Risk & Comor    | Mental and be                 | Adh Medicatio   | Cross-sectiona |
| Disease Analy | Applied studie | General epide  | Risk & Comor    | Diseases of th                | -               | cohort         |
| Disease Analy | Applied studie | Pharmacoecon   | Incidence and   | Diseases of th                | Antibiotics     | Case-Control   |
| MedVip        | Methodologic   | Generalizable  | Data Collectio  | Not Applicabl                 | -               | Methodologic   |
| BeoNet-Hann   | Methodologic   | Generalizable  | Unified Mode    | Not Applicabl                 | -               | Methodologic   |
| BeoNet-Hann   | Applied studie | General epide  | Risk & Comor    | Diseases of the respiratory s |                 | cross-sectiona |
| Disease Analy | Applied studie | Pharmacoecon   | Treatment-re    | Endocrine, nu                 | Vildagliptin    | Cohort         |
| Disease Analy | Applied studie | General epide  | Incidence and   | Diseases of th                | -               | Case-Control   |
| Disease Analy | Applied studie | Pharmacoecon   | Prescription P  | Mental and be                 | SSRI            | Case-Control   |
| Disease Analy | Applied studie | General epide  | Incidence and   | Mental and be                 | -               | Case-Control   |
| MedVip        | Applied studie | Health service | Quality of Care | Diseases of th                | -               | Cross-sectiona |
| Disease Analy | Applied studie | Pharmacoecon   | Treatment-re    | Endocrine, nu                 | Basal Support   | Cohort         |
| Disease Analy | Applied studie | Pharmacoecon   | Risk & Comor    | Endocrine, nu                 | Insulin Glargin | Cohort         |
| Disease Analy | Applied studie | Pharmacoecon   | Prescription P  | Endocrine, nu                 | Intensified Co  | Cohort         |
| Disease Analy | Applied studie | Pharmacoecon   | Treatment-re    | Neoplasms                     | Tamoxifen       | Cohort         |
| Disease Analy | Applied studie | Health service | Treatment-re    | Mental and be                 | Antidepressan   | Retrospective  |
| Disease Analy | Applied studie | Pharmacoecon   | Prescription P  | Endocrine, nu                 | -               | Cohort         |
| Disease Analy | Applied studie | General epide  | Incidence and   | Mental and be                 | -               | Case-Control   |
| Disease Analy | Applied studie | Pharmacoecon   | Prescription P  | Endocrine, nu                 | Metformin       | Cohort         |
| Disease Analy | Applied studie | General epide  | Incidence and   | Endocrine, nu                 | -               | Cohort         |
| Disease Analy | Applied studie | General epide  | Incidence and   | Endocrine, nu                 | -               | Cohort         |
| Disease Analy | Applied studie | Pharmacoecon   | Epidemiology    | Mental and be                 | Ssris           | Retrospective  |
| Disease Analy | Applied studie | Pharmacoecon   | Treatment-re    | Neoplasms                     | -               | Cohort         |
| Disease Analy | Applied studie | Pharmacoecon   | Treatment-re    | Endocrine, nu                 | Basal Insulin T | Retrospective  |
| Disease Analy | Applied studie | General epide  | Incidence and   | Endocrine, nu                 | -               | Cohort         |
| Disease Analy | Applied studie | Pharmacoecon   | Treatment-re    | Endocrine, nu                 | Metformin       | Retrospective  |
| Disease Analy | Applied studie | Pharmacoecon   | Prescription P  | Neoplasms                     | Opioids         | Cohort         |

|    |               |                |                |                |                |                              |
|----|---------------|----------------|----------------|----------------|----------------|------------------------------|
| 1  |               |                |                |                |                |                              |
| 2  | Disease Analy | Applied studie | General epide  | Incidence and  | Endocrine, nu  | Statin Therapy               |
| 3  | Disease Analy | Applied studie | Pharmacoecon   | Treatment-rel  | Endocrine, nu  | Dapagliflozin Cohort         |
| 4  | Disease Analy | Applied studie | Pharmacoecon   | Prescription P | Endocrine, nu  | Antidiabetic D cohort        |
| 5  | Disease Analy | Applied studie | Pharmacoecon   | Prescription P | Endocrine, nu  | Basal Insulin S Cohort       |
| 6  | Disease Analy | Applied studie | General epide  | Treatment-rel  | Multiple Disea | Cross-sectiona               |
| 7  | Disease Analy | Applied studie | General epide  | Incidence and  | Mental and be  | Cross-sectiona               |
| 8  | Disease Analy | Applied studie | General epide  | Risk & Comor   | Diseases of th | cohort                       |
| 9  | Disease Analy | Applied studie | Pharmacoecon   | Treatment-rel  | Diseases of th | Ivly Leaf Dry Ex Cohort      |
| 10 | Disease Analy | Applied studie | Pharmacoecon   | Treatment-rel  | Diseases of th | Ivly Leaf Dry Ex Cohort      |
| 11 | Disease Analy | Applied studie | Pharmacoecon   | Risk & Comor   | Neoplasms      | Metformin Cohort             |
| 12 | Disease Analy | Applied studie | Health Service | Quality of Car | Endocrine, nu  | -                            |
| 13 | Disease Analy | Applied studie | General epide  | Incidence and  | Mental and be  | Antidepressan Cohort         |
| 14 | CONTENT       | Applied studie | Pharmacoecon   | Prescription P | Symptoms, sig  | Antibiotics Cross-sectiona   |
| 15 | Disease Analy | Applied studie | Pharmacoecon   | Treatment-rel  | Endocrine, nu  | Insulin Glulis Cohort        |
| 16 | MedVip        | Applied studie | Health service | Quality of Car | Diseases of th | - Cross-sectiona             |
| 17 | CONTENT       | Applied studie | Health service | Health Service | Multiple Disea | - Cross-sectiona             |
| 18 | Disease Analy | Applied studie | Pharmacoecon   | Prescription P | Diseases of th | Benzodiazepir Cohort         |
| 19 | Disease Analy | Applied studie | Health Service | Diagnosis Stud | Diseases of th | - Case-Control               |
| 20 | Disease Analy | Applied studie | Pharmacoecon   | Prescription P | Diseases of th | Teriparatide Cohort          |
| 21 | Disease Analy | Applied studie | Pharmacoecon   | Treatment-rel  | Endocrine, nu  | Menopausal H Retrospective   |
| 22 | Disease Analy | Applied studie | Pharmacoecon   | Prescription P | Endocrine, nu  | Estrogen Repl Retrospective  |
| 23 | Disease Analy | Applied studie | Pharmacoecon   | Risk & Comor   | Diseases of th | Dmpa Case-Control            |
| 24 | Disease Analy | Applied studie | Pharmacoecon   | Risk & Comor   | Neoplasms      | Tamoxifen cohort             |
| 25 | Disease Analy | Applied studie | Pharmacoecon   | Risk & Comor   | Diseases of th | Progestogen-C Case-Control   |
| 26 | Disease Analy | Applied studie | Pharmacoecon   | Risk & Comor   | Diseases of th | Proton Pump Case-Control     |
| 27 | Disease Analy | Applied studie | Pharmacoecon   | Risk & Comor   | Diseases of th | Proton Pump Case-Control     |
| 28 | Disease Analy | Applied studie | General epide  | Incidence and  | Diseases of th | - Case-Control               |
| 29 | Disease Analy | Applied studie | General epide  | Incidence and  | Mental and be  | - cohort                     |
| 30 | Disease Analy | Applied studie | General epide  | Risk & Comor   | Diseases of th | - cohort                     |
| 31 | Disease Analy | Applied studie | Pharmacoecon   | Prescription P | Diseases of th | Diuretics, On Cohort         |
| 32 | Disease Analy | Applied studie | Pharmacoecon   | Prescription P | Diseases of th | Anti-Seizure D Case-Control  |
| 33 | CONTENT       | Methodologic   | Database-spe   | Project Descri | Not Applicabl  | - Methodologic               |
| 34 | CONTENT       | Applied studie | Health service | Health Service | Multiple Disea | - Cross-sectiona             |
| 35 | CONTENT       | Applied studie | Health service | Health Service | Multiple Disea | - Cross-sectiona             |
| 36 | CONTENT       | Applied studie | Pharmacoecon   | Prescription P | Diseases of th | - Cross-sectiona             |
| 37 | CONTENT       | Applied studie | Health service | Quality of Car | Diseases of th | -                            |
| 38 | CONTENT       | Applied studie | Pharmacoecon   | Prescription P | Endocrine, nu  | Incretin Mime Cross-sectiona |
| 39 | CONTENT       | Applied studie | Pharmacoecon   | Prescription P | Multiple Disea | Phytopharma Cross-sectiona   |
| 40 | Disease Analy | Applied studie | General epide  | Incidence and  | Diseases of th | - Cross-sectiona             |
| 41 | BeoNet-Hann   | Methodologic   | Database-spe   | Project Descri | Not Applicabl  | - Methodologic               |
| 42 | Disease Analy | Applied studie | Pharmacoecon   | Prescription P | Diseases of th | Oral Corticoste Cohort       |
| 43 | Disease Analy | Applied studie | General epide  | Incidence and  | Diseases of th | - cohort                     |
| 44 | Disease Analy | Applied studie | General epide  | Risk & Comor   | Neoplasms      | - cohort                     |
| 45 | Disease Analy | Applied studie | General epide  | Risk & Comor   | Neoplasms      | - Case-Control               |
| 46 | Disease Analy | Applied studie | General epide  | Risk & Comor   | Diseases of th | - cohort                     |
| 47 | Disease Analy | Applied studie | General epide  | Risk & Comor   | Diseases of th | - Case-Control               |
| 48 | Disease Analy | Applied studie | General epide  | Risk & Comor   | Diseases of th | - cohort                     |
| 49 | Disease Analy | Applied studie | General epide  | Epidemiology   | External cause | Sars-Cov-2 Va cohort         |
| 50 | Disease Analy | Applied studie | General epide  | Risk & Comor   | Diseases of th | - Cross-sectiona             |
| 51 | Disease Analy | Applied studie | General epide  | Risk & Comor   | Neoplasms      | - cohort                     |

1

2

3

4

5

6

7

8

9

10

11

12

13

14

15

16

17

18

19

20

21

22

23

24

25

26

27

28

29

30

31

32

33

34

35

36

37

38

39

40

41

42

43

44

45

46

47

48

49

50

51

52

53

54

55

56

57

58

59

60

|               |                |                |                |                |                  |                |
|---------------|----------------|----------------|----------------|----------------|------------------|----------------|
| Disease Analy | Applied studie | General epide  | Risk & Comor   | Diseases of th | -                | cohort         |
| Disease Analy | Applied studie | General epide  | Risk & Comor   | Diseases of th | -                | Cross-sectiona |
| Disease Analy | Applied studie | General epide  | Risk & Comor   | Neoplasms      | -                | cohort         |
| Disease Analy | Applied studie | Pharmacoeco    | Treatment-re   | Diseases of th | Subcutaneous     | cohort         |
| MedVip        | Applied studie | Pharmacoeco    | Epidemiology   | Multiple Disea | Various Medic    | Cross-sectiona |
| Disease Analy | Applied studie | Pharmacoeco    | Treatment-re   | Diseases of th | Phytopharma      | cohort         |
| Disease Analy | Applied studie | General epide  | Risk & Comor   | Diseases of th | Different Anti   | Cohort         |
| Disease Analy | Applied studie | Pharmacoeco    | Prescription P | Diseases of th | Immunothera      | Cohort         |
| Disease Analy | Applied studie | Pharmacoeco    | Prescription P | Diseases of th | Oral Anticoag    | Cross-sectiona |
| Disease Analy | Applied studie | Pharmacoeco    | Prescription P | Diseases of th | Fluoroquinolo    | Cross-sectiona |
| Disease Analy | Applied studie | Health Service | Quality of Car | Diseases of th | -                | cohort         |
| Disease Analy | Applied studie | Pharmacoeco    | Treatment-re   | Mental and be  | -                | cohort         |
| Disease Analy | Applied studie | Pharmacoeco    | Prescription P | Diseases of th | Anti-Seizure M   | Cross-sectiona |
| CONTENT       | Applied studie | Health service | Health Service | Diseases of th | -                |                |
| CONTENT       | Applied studie | General epide  | Risk & Comor   | Diseases of th | -                | Cohort         |
| CONTENT       | Applied studie | General epide  | Incidence and  | Diseases of th | -                | Cross-sectiona |
| CONTENT       | Applied studie | General epide  | Incidence and  | Diseases of th | -                | Cross-sectiona |
| Disease Analy | Applied studie | Pharmacoeco    | Prescription P | Diseases of th | Oral Corticost   | Cohort         |
| Disease Analy | Applied studie | General epide  | Incidence and  | Diseases of th | -                | cohort         |
| Disease Analy | Applied studie | General epide  | Incidence and  | Diseases of th | -                | methodologic   |
| Disease Analy | Applied studie | General epide  | Incidence and  | Diseases of th | -                | Cross-sectiona |
| Disease Analy | Applied studie | Pharmacoeco    | Prescription P | Diseases of th | Corticosteroid   | Cross-sectiona |
| Disease Analy | Applied studie | Pharmacoeco    | Prescription P | Certain infect | Antiemetic Me    | Cohort         |
| Disease Analy | Applied studie | Pharmacoeco    | Prescription P | Endocrine, nu  | Insulin Glargin  | Cohort         |
| CONTENT       | Applied studie | Pharmacoeco    | Prescription P | Diseases of th | Anticholinerg    | Case-Control   |
| Disease Analy | Applied studie | General epide  | Risk & Comor   | Endocrine, nu  | -                | Cohort         |
| Disease Analy | Applied studie | Pharmacoeco    | Prescription P | Endocrine, nu  | Bot              | Cohort         |
| Disease Analy | Applied studie | Pharmacoeco    | Epidemiology   | Endocrine, nu  | Insulin          | cohort         |
| Disease Analy | Applied studie | Pharmacoeco    | Treatment-re   | Endocrine, nu  | Glp-1 Recepto    | Cohort         |
| Disease Analy | Applied studie | Generalizable  | Method Deve    | Diseases of th | -                | Methodologic   |
| Disease Analy | Applied studie | Pharmacoeco    | Prescription P | Endocrine, nu  | Glargine         | Cross-sectiona |
| Disease Analy | Applied studie | Pharmacoeco    | Treatment-re   | Endocrine, nu  | Insulin Aspart   | Case-Control   |
| Disease Analy | Applied studie | Pharmacoeco    | Treatment-re   | Endocrine, nu  | Basal Insulins   | Retrospective  |
| Disease Analy | Applied studie | Pharmacoeco    | Treatment-re   | Endocrine, nu  | Rapid-Acting     | Cohort         |
| Disease Analy | Applied studie | General epide  | Risk & Comor   | Endocrine, nu  | -                | Case-Control   |
| Disease Analy | Applied studie | Pharmacoeco    | Prescription P | Endocrine, nu  | Insulin (lct, Bo | Cohort         |
| Disease Analy | Applied studie | Pharmacoeco    | Risk & Comor   | Endocrine, nu  | Dpp4l            | cohort         |
| Disease Analy | Applied studie | Validation stu | Ehr Database   | Multiple Disea | -                | Cross-sectiona |
| Disease Analy | Applied studie | General epide  | Risk & Comor   | Mental and be  | -                | Cross-sectiona |
| Disease Analy | Applied studie | General epide  | Incidence and  | Endocrine, nu  | -                | Cross-sectiona |
| Disease Analy | Applied studie | Pharmacoeco    | Treatment-re   | Endocrine, nu  | -                | Cohort         |
| Disease Analy | Applied studie | General epide  | Incidence and  | Endocrine, nu  | -                | cohort         |
| Disease Analy | Applied studie | Pharmacoeco    | Treatment-re   | Diseases of th | Levodopa         | Cohort         |
| Disease Analy | Applied studie | Health service | Prescription P | Diseases of th | Morphine,Hyc     | Cohort         |
| Disease Analy | Applied studie | General epide  | Incidence and  | Mental and be  | -                | cohort         |
| Disease Analy | Applied studie | General epide  | Incidence and  | Diseases of th | -                | cohort         |
| Disease Analy | Applied studie | Pharmacoeco    | Incidence and  | Neoplasms      | Penicillins, Ce  | Case-Control   |
| CONTENT       | Applied studie | General epide  | Incidence and  | Mental and be  | -                | Cross-sectiona |
| Disease Analy | Applied studie | Pharmacoeco    | Treatment-re   | Endocrine, nu  | Dapagliflozin    | cohort         |
| MedVip        | Applied studie | Health service | Health Service | Diseases of th | -                | Cohort         |

|    |               |                |                |                |                |                                |
|----|---------------|----------------|----------------|----------------|----------------|--------------------------------|
| 1  |               |                |                |                |                |                                |
| 2  | Disease Analy | Applied studie | General epide  | Risk & Comor   | Endocrine, nu  | - Case-Control                 |
| 3  | Disease Analy | Applied studie | Pharmacoecon   | Prescription P | Endocrine, nu  | Insulin Lispro Cross-sectiona  |
| 4  | Disease Analy | Applied studie | General epide  | Incidence and  | Mental and be  | - cohort                       |
| 5  | Disease Analy | Applied studie | Pharmacoecon   | Prescription P | Multiple Disea | Antiepileptic E Cross-sectiona |
| 6  | Disease Analy | Applied studie | Pharmacoecon   | Prescription P | Endocrine, nu  | Lipid-Lowering Cohort          |
| 7  | Disease Analy | Applied studie | Pharmacoecon   | Prescription P | Diseases of th | Off-Label Drug Cross-sectiona  |
| 8  | Disease Analy | Applied studie | General epide  | Incidence and  | Diseases of th | - Retrospective                |
| 9  | Disease Analy | Applied studie | Pharmacoecon   | Prescription P | Mental and be  | Paliperidon ER Cohort          |
| 10 | Disease Analy | Applied studie | Pharmacoecon   | Prescription P | Diseases of th | Fentanyl (Tran Cohort          |
| 11 | Disease Analy | Applied studie | Pharmacoecon   | Prescription P | Diseases of th | Fentanyl (Tran Cohort          |
| 12 | Disease Analy | Applied studie | Pharmacoecon   | Prescription P | Multiple Disea | Fentanyl Cohort                |
| 13 | Disease Analy | Applied studie | Pharmacoecon   | Prescription P | Diseases of th | Fentanyl (Tran Cohort          |
| 14 | MedVip        | Applied studie | Health service | Health Service | Multiple Disea | - Cross-sectiona               |
| 15 | Disease Analy | Applied studie | Pharmacoecon   | Prescription P | Multiple Disea | - Cross-sectiona               |
| 16 | Disease Analy | Applied studie | Pharmacoecon   | Risk & Comor   | Neoplasms      | Anti-Seizure M Case-Control    |
| 17 | Disease Analy | Applied studie | General epide  | Incidence and  | Endocrine, nu  | - Case-Control                 |
| 18 | Disease Analy | Applied studie | Pharmacoecon   | Risk & Comor   | Diseases of th | Aromatase Inhib Case-Control   |
| 19 | Disease Analy | Applied studie | General epide  | Risk & Comor   | Neoplasms      | - Case-Control                 |
| 20 | Disease Analy | Applied studie | General epide  | Incidence and  | Diseases of th | - Case-Control                 |
| 21 | Disease Analy | Applied studie | General epide  | Incidence and  | Injury, poison | - Cohort                       |
| 22 | Disease Analy | Applied studie | General epide  | Incidence and  | Diseases of th | - Cross-sectiona               |
| 23 | Disease Analy | Applied studie | General epide  | Risk & Comor   | Mental and be  | - Case-Control                 |
| 24 | Disease Analy | Applied studie | Pharmacoecon   | Risk & Comor   | Diseases of th | Sibutramine Case-Control       |
| 25 | Disease Analy | Applied studie | Pharmacoecon   | Prescription P | Endocrine, nu  | Blood Glucose Cohort           |
| 26 | Disease Analy | Applied studie | General epide  | Incidence and  | Endocrine, nu  | - cohort                       |
| 27 | Disease Analy | Applied studie | General epide  | Incidence and  | Endocrine, nu  | - Cross-sectiona               |
| 28 | Disease Analy | Applied studie | Pharmacoecon   | Prescription P | Multiple Disea | - Cross-sectiona               |
| 29 | Disease Analy | Applied studie | Pharmacoecon   | Treatment-re   | Diseases of th | Novohaler (Ics Retrospective   |
| 30 | Disease Analy | Applied studie | Pharmacoecon   | Prescription P | Diseases of th | Sacubitril/Vals Cohort         |
| 31 | Disease Analy | Applied studie | Pharmacoecon   | Prescription P | Diseases of th | Sacubitril/Vals Cohort         |
| 32 | Disease Analy | Applied studie | General epide  | Risk & Comor   | Mental and be  | Antihypertens Case-Control     |
| 33 | Disease Analy | Applied studie | General epide  | Risk & Comor   | Diseases of th | - Cross-sectiona               |
| 34 | Disease Analy | Applied studie | Health Service | Risk & Comor   | Diseases of th | Antihyperglyc cohort           |
| 35 | Disease Analy | Applied studie | Pharmacoecon   | Treatment-re   | Endocrine, nu  | - Case-Control                 |
| 36 | Disease Analy | Applied studie | General epide  | Incidence and  | Diseases of th | - Cross-sectiona               |
| 37 | Disease Analy | Applied studie | Pharmacoecon   | Incidence and  | Diseases of th | Short-Acting B Cross-sectiona  |
| 38 | Disease Analy | Applied studie | Pharmacoecon   | Prescription P | Endocrine, nu  | Antidiabetics ( Cohort         |
| 39 | Disease Analy | Applied studie | Pharmacoecon   | Prescription P | Not Applicabl  | Levonorgestre Cohort           |
| 40 | Disease Analy | Applied studie | Pharmacoecon   | Risk & Comor   | Diseases of th | Desogestrel, E Retrospective   |
| 41 | Disease Analy | Applied studie | General epide  | Incidence and  | Diseases of th | - Cross-sectiona               |
| 42 | Disease Analy | Applied studie | General epide  | Obstetrics and | Endocrine, nu  | - cohort                       |
| 43 | Disease Analy | Applied studie | Pharmacoecon   | Treatment-re   | Multiple Disea | Alendronate S Cohort           |
| 44 | BeoNet-Halle  | Methodologic   | Database-spec  | Project Descri | Not Applicabl  | - Methodologic                 |
| 45 |               |                |                |                |                |                                |
| 46 |               |                |                |                |                |                                |
| 47 |               |                |                |                |                |                                |
| 48 |               |                |                |                |                |                                |
| 49 |               |                |                |                |                |                                |
| 50 |               |                |                |                |                |                                |
| 51 |               |                |                |                |                |                                |
| 52 |               |                |                |                |                |                                |
| 53 |               |                |                |                |                |                                |
| 54 |               |                |                |                |                |                                |
| 55 |               |                |                |                |                |                                |
| 56 |               |                |                |                |                |                                |
| 57 |               |                |                |                |                |                                |
| 58 |               |                |                |                |                |                                |
| 59 |               |                |                |                |                |                                |
| 60 |               |                |                |                |                |                                |

1  
2  
3  
4  
5  
6  
7  
8  
9  
10  
11  
12  
13  
14  
15  
16  
17  
18  
19  
20  
21  
22  
23  
24  
25  
26  
27  
28  
29  
30  
31  
32  
33  
34  
35  
36  
37  
38  
39  
40  
41  
42  
43  
44  
45  
46  
47  
48  
49  
50  
51  
52  
53  
54  
55  
56  
57  
58  
59  
60

| control | group | other DB | includ  | industry | fundi | practices | total | non-GP | includ | no.     | months of | follow-Up |
|---------|-------|----------|---------|----------|-------|-----------|-------|--------|--------|---------|-----------|-----------|
| no      | no    | yes      | unknown | no       |       |           |       |        |        | 49      | unknown   |           |
| no      | yes   | yes      |         | 400      | yes   |           |       |        |        | 6       | yes       |           |
| no      | no    | no       |         | 0        | no    | unknown   |       |        |        | unknown | unknown   |           |
| yes     | no    | unknown  | unknown |          | no    |           |       |        |        | 60      | unknown   |           |
| no      | no    | yes      |         | 1511     | no    |           |       |        |        | 36      | unknown   |           |
| no      | no    | unknown  | unknown |          | yes   |           |       |        |        | 55      | unknown   |           |
| no      | no    | no       |         | 209      | yes   |           |       |        |        | 48      | yes       |           |
| yes     | no    | no       |         | 203      | yes   |           |       |        |        | 84      | yes       |           |
| no      | no    | no       |         | 485      | yes   |           |       |        |        | 132     | unknown   |           |
| yes     | no    | no       |         | 957      | yes   |           |       |        |        | 24      | unknown   |           |
| no      | no    | no       |         | 55       | yes   |           |       |        |        | 36      | unknown   |           |
| no      | no    | yes      | unknown |          | yes   |           |       |        |        | 240     | yes       |           |
| yes     | no    | unknown  | unknown |          | no    | unknown   |       |        |        | unknown | unknown   |           |
| no      | no    | unknown  |         | 1412     | yes   |           |       |        |        | 120     | unknown   |           |
| yes     | no    | no       | unknown |          | no    |           |       |        |        | 60      | unknown   |           |
| no      | no    | yes      |         | 922      | no    |           |       |        |        | 12      | unknown   |           |
| no      | yes   | yes      | unknown |          | yes   |           |       |        |        | 60      | yes       |           |
| no      | no    | unknown  |         | 800      | yes   |           |       |        |        | 109     | unknown   |           |
| yes     | no    | yes      | unknown |          | yes   |           |       |        |        | 27      | yes       |           |
| no      | no    | yes      | unknown |          | no    |           |       |        |        | 22      | unknown   |           |
| no      | yes   | yes      |         | 0        | no    | unknown   |       |        |        | unknown | unknown   |           |
| no      | no    | yes      |         | 156      | yes   |           |       |        |        | 60      | yes       |           |
| yes     | no    | no       |         | 1274     | no    |           |       |        |        | 168     | unknown   |           |
| yes     | no    | no       |         | 1274     | no    |           |       |        |        | 168     | yes       |           |
| yes     | no    | no       |         | 256      | yes   |           |       |        |        | 12      | unknown   |           |
| yes     | no    | no       |         | 1072     | no    |           |       |        |        | 109     | yes       |           |
| yes     | no    | unknown  | unknown |          | no    |           |       |        |        | 120     | yes       |           |
| no      | no    | yes      |         | 1630     | yes   |           |       |        |        | 24      | unknown   |           |
| no      | no    | yes      |         | 1141     | no    |           |       |        |        | 24      | unknown   |           |
| no      | no    | no       |         | 31       | no    |           |       |        |        | 24      | yes       |           |
| no      | no    | yes      | unknown |          | yes   |           |       |        |        | 36      | yes       |           |
| no      | no    | no       |         | 136      | yes   |           |       |        |        | 120     | unknown   |           |
| no      | no    | unknown  |         | 1218     | yes   |           |       |        |        | 48      | unknown   |           |
| no      | no    | yes      | unknown |          | yes   |           |       |        |        | 36      | unknown   |           |
| no      | no    | yes      |         | 2464     | yes   |           |       |        |        | 111     | unknown   |           |
| no      | no    | yes      |         | 2464     | yes   |           |       |        |        | 120     | yes       |           |
| no      | no    | yes      | unknown |          | yes   |           |       |        |        | 12      | unknown   |           |
| no      | no    | no       |         | 346      | yes   | unknown   |       |        |        | unknown | unknown   |           |
| no      | no    | yes      |         | 0        | no    |           |       |        |        | 18      | unknown   |           |
| no      | no    | unknown  |         | 309      | yes   | unknown   |       |        |        | unknown | yes       |           |
| no      | no    | no       |         | 8        | no    |           |       |        |        | 13      | unknown   |           |
| no      | no    | no       |         | 118      | no    |           |       |        |        | 132     | unknown   |           |
| no      | no    | no       |         | 123      | no    |           |       |        |        | 121     | unknown   |           |
| yes     | no    | no       |         | 153      | no    |           |       |        |        | 121     | unknown   |           |
| no      | no    | no       |         | 0        | no    | unknown   |       |        |        | unknown | unknown   |           |
| no      | no    | no       |         | 0        | no    | unknown   |       |        |        | unknown | unknown   |           |
| no      | no    | no       |         | 7        | no    | unknown   |       |        |        | unknown | unknown   |           |
| yes     | no    | no       |         | 48       | yes   |           |       |        |        | 50      | unknown   |           |
| no      | yes   | no       |         | 0        | no    |           |       |        |        | 66      | unknown   |           |

|    |     |     |         |         |     |                |         |
|----|-----|-----|---------|---------|-----|----------------|---------|
| 1  |     |     |         |         |     |                |         |
| 2  | no  | yes | no      | 0       | no  | 126            | unknown |
| 3  | no  | no  | no      | unknown | yes | 120            | yes     |
| 4  | yes | no  | unknown | unknown | yes | 120            | unknown |
| 5  | no  | no  | no      | 32      | yes | 60             | unknown |
| 6  | yes | no  | yes     | unknown | yes | 42             | unknown |
| 7  | no  | no  | no      | 0       | no  | unknown        | unknown |
| 8  | no  | no  | no      | 5       | no  | 43             | unknown |
| 9  | yes | no  | no      | 400     | yes | 109            | unknown |
| 10 | yes | no  | no      | unknown | no  | 61             | unknown |
| 11 | yes | no  | no      | unknown | no  | 60             | unknown |
| 12 | no  | no  | unknown | 1202    | no  | 60             | unknown |
| 13 | no  | no  | no      | 223     | yes | 48             | yes     |
| 14 | no  | no  | no      | unknown | no  | 108            | yes     |
| 15 | yes | no  | no      | unknown | yes | 48             | unknown |
| 16 | yes | no  | no      | unknown | yes | 168            | yes     |
| 17 | no  | no  | unknown | unknown | no  | unknown        | unknown |
| 18 | yes | no  | unknown | unknown | yes | 37             | unknown |
| 19 | yes | no  | no      | unknown | no  | 25             | unknown |
| 20 | no  | no  | no      | 21      | yes | 108            | yes     |
| 21 | yes | no  | no      | 281     | yes | 60             | unknown |
| 22 | no  | no  | no      | 48      | yes | not applicable | unknown |
| 23 | no  | no  | unknown | 1286    | yes | 96             | yes     |
| 24 | no  | no  | unknown | 102     | yes | not applicable | no      |
| 25 | no  | yes | no      | unknown | yes | 12             | unknown |
| 26 | yes | no  | no      | 1262    | no  | 192            | yes     |
| 27 | yes | no  | yes     | 1473    | yes | 51             | unknown |
| 28 | no  | no  | no      | 0       | no  | unknown        | unknown |
| 29 | no  | no  | no      | 0       | no  | unknown        | unknown |
| 30 | no  | no  | no      | unknown | yes | unknown        | yes     |
| 31 | no  | no  | yes     | unknown | yes | 84             | unknown |
| 32 | yes | no  | no      | unknown | no  | 120            | unknown |
| 33 | yes | no  | no      | 175     | yes | 120            | unknown |
| 34 | yes | no  | no      | unknown | no  | 108            | unknown |
| 35 | no  | no  | no      | 5       | no  | 43             | unknown |
| 36 | no  | no  | no      | 1137    | yes | 204            | unknown |
| 37 | no  | no  | yes     | 1251    | yes | 87             | unknown |
| 38 | no  | no  | yes     | unknown | no  | 102            | unknown |
| 39 | no  | no  | unknown | unknown | no  | 48             | yes     |
| 40 | no  | yes | unknown | unknown | yes | 35             | unknown |
| 41 | no  | yes | yes     | unknown | no  | 192            | yes     |
| 42 | yes | no  | no      | unknown | no  | 120            | unknown |
| 43 | yes | no  | yes     | 0       | no  | unknown        | unknown |
| 44 | no  | no  | yes     | 1072    | no  | 12             | unknown |
| 45 | no  | yes | yes     | unknown | no  | 60             | unknown |
| 46 | no  | yes | no      | 1192    | no  | 48             | yes     |
| 47 | no  | no  | no      | unknown | no  | 132            | unknown |
| 48 | no  | no  | unknown | 1024    | yes | 48             | yes     |
| 49 | yes | no  | yes     | unknown | no  | 103            | no      |
| 50 | no  | no  | unknown | 842     | yes | 48             | yes     |
| 51 | yes | no  | no      | 1348    | yes | 60             | yes     |

1  
2  
3  
4  
5  
6  
7  
8  
9  
10  
11  
12  
13  
14  
15  
16  
17  
18  
19  
20  
21  
22  
23  
24  
25  
26  
27  
28  
29  
30  
31  
32  
33  
34  
35  
36  
37  
38  
39  
40  
41  
42  
43  
44  
45  
46  
47  
48  
49  
50  
51  
52  
53  
54  
55  
56  
57  
58  
59  
60

|     |     |         |         |     |         |         |
|-----|-----|---------|---------|-----|---------|---------|
| no  | no  | unknown | 1262    | no  | 12      | unknown |
| yes | no  | yes     | unknown | no  | 32      | unknown |
| yes | no  | no      | unknown | yes | 60      | unknown |
| yes | no  | no      | unknown | no  | 24      | unknown |
| no  | no  | unknown | unknown | no  | 12      | no      |
| no  | no  | no      | 168     | yes | 21      | unknown |
| no  | no  | no      | 1182    | no  | 108     | yes     |
| yes | no  | yes     | 1032    | no  | 48      | unknown |
| yes | no  | yes     | 1032    | no  | 48      | unknown |
| yes | no  | no      | unknown | yes | 156     | yes     |
| no  | no  | no      | 837     | yes | 30      | unknown |
| no  | no  | no      | unknown | no  | 27      | unknown |
| no  | no  | no      | 37      | no  | 49      | unknown |
| yes | no  | unknown | unknown | no  | 65      | unknown |
| no  | no  | no      | 138     | no  | 15      | unknown |
| no  | no  | no      | 23      | no  | 12      | unknown |
| no  | no  | yes     | 3000    | yes | 11      | unknown |
| yes | no  | yes     | 180     | yes | 96      | unknown |
| no  | no  | no      | unknown | yes | 96      | yes     |
| no  | no  | no      | unknown | yes | 120     | yes     |
| no  | no  | no      | unknown | yes | 120     | yes     |
| yes | no  | no      | unknown | yes | 72      | yes     |
| yes | no  | no      | 196     | yes | 252     | yes     |
| yes | no  | no      | 179     | no  | 120     | unknown |
| yes | no  | yes     | unknown | no  | 120     | yes     |
| yes | no  | yes     | 1178    | no  | 120     | unknown |
| yes | no  | no      | 1262    | no  | 192     | yes     |
| yes | no  | yes     | 1262    | no  | 192     | yes     |
| yes | no  | yes     | 1034    | yes | 168     | yes     |
| no  | no  | no      | unknown | no  | 48      | yes     |
| yes | no  | yes     | 236     | yes | 96      | unknown |
| no  | no  | no      | 0       | no  | unknown | unknown |
| no  | no  | no      | 17      | no  | 21      | unknown |
| no  | no  | no      | 17      | no  | 12      | unknown |
| no  | no  | no      | 22      | no  | 12      | unknown |
| no  | no  | no      | unknown | no  | unknown | unknown |
| no  | no  | no      | 35      | no  | 65      | unknown |
| no  | no  | no      | 41      | no  | 60      | unknown |
| no  | yes | yes     | 4690    | no  | 72      | unknown |
| no  | no  | no      | 0       | no  | unknown | unknown |
| no  | no  | yes     | unknown | no  | unknown | unknown |
| no  | no  | no      | 787     | yes | 84      | yes     |
| yes | no  | no      | 1284    | yes | 240     | yes     |
| yes | no  | no      | 1274    | yes | 180     | unknown |
| yes | no  | no      | 1193    | no  | 168     | yes     |
| yes | no  | yes     | unknown | no  | 192     | yes     |
| yes | no  | no      | 924     | no  | 180     | yes     |
| no  | no  | no      | 827     | no  | 6       | unknown |
| no  | no  | no      | 1056    | no  | 13      | unknown |
| yes | no  | no      | 924     | no  | 180     | yes     |



|    |     |     |         |         |     |                |         |
|----|-----|-----|---------|---------|-----|----------------|---------|
| 1  |     |     |         |         |     |                |         |
| 2  | no  | no  | no      | 1240    | no  | 108            | yes     |
| 3  | yes | no  | no      | 1274    | no  | 180            | unknown |
| 4  | no  | no  | no      | 832     | no  | 120            | yes     |
| 5  | no  | no  | yes     | unknown | yes | 42             | unknown |
| 6  | no  | no  | unknown | 148     | no  | 85             | unknown |
| 7  | yes | no  | yes     | unknown | no  | 51             | unknown |
| 8  | no  | no  | unknown | unknown | no  | unknown        | yes     |
| 9  | no  | no  | yes     | unknown | yes | not applicable | unknown |
| 10 | no  | no  | yes     | unknown | yes | 36             | unknown |
| 11 | no  | yes | no      | unknown | no  | 192            | unknown |
| 12 | no  | yes | yes     | unknown | yes | 36             | unknown |
| 13 | no  | no  | no      | 1188    | no  | 48             | yes     |
| 14 | no  | no  | yes     | unknown | yes | 5              | yes     |
| 15 | yes | no  | unknown | 0       | no  | unknown        | unknown |
| 16 | yes | no  | unknown | 0       | no  | 37             | unknown |
| 17 | no  | no  | unknown | 32      | no  | 36             | unknown |
| 18 | yes | no  | no      | 0       | no  | 36             | unknown |
| 19 | no  | no  | yes     | 1168    | yes | 12             | yes     |
| 20 | no  | yes | yes     | unknown | yes | not applicable | yes     |
| 21 | no  | yes | yes     | unknown | no  | unknown        | unknown |
| 22 | no  | no  | no      | unknown | yes | 12             | no      |
| 23 | no  | no  | no      | 1046    | yes | 12             | unknown |
| 24 | no  | yes | yes     | unknown | no  | 12             | unknown |
| 25 | no  | no  | unknown | unknown | no  | unknown        | unknown |
| 26 | yes | no  | no      | 0       | no  | 60             | unknown |
| 27 | no  | no  | no      | unknown | no  | 60             | yes     |
| 28 | yes | no  | yes     | 918     | no  | 60             | unknown |
| 29 | no  | no  | yes     | 1072    | yes | 168            | unknown |
| 30 | no  | no  | yes     | 323     | yes | 36             | yes     |
| 31 | no  | yes | yes     | unknown | no  | unknown        | unknown |
| 32 | yes | no  | unknown | 277     | yes | 51             | unknown |
| 33 | yes | no  | yes     | unknown | yes | 138            | unknown |
| 34 | no  | no  | yes     | unknown | no  | 36             | unknown |
| 35 | yes | no  | yes     | 2000    | no  | 105            | unknown |
| 36 | yes | no  | no      | 1072    | yes | 168            | yes     |
| 37 | no  | no  | unknown | unknown | no  | unknown        | unknown |
| 38 | yes | no  | yes     | unknown | yes | 84             | yes     |
| 39 | yes | no  | unknown | 2498    | no  | unknown        | unknown |
| 40 | no  | yes | yes     | 108     | yes | 22             | unknown |
| 41 | no  | no  | no      | 939     | yes | 36             | unknown |
| 42 | yes | no  | yes     | 818     | no  | 12             | unknown |
| 43 | yes | no  | no      | 1171    | yes | 11             | yes     |
| 44 | no  | no  | unknown | unknown | no  | 120            | unknown |
| 45 | no  | no  | yes     | unknown | no  | 36             | unknown |
| 46 | yes | no  | no      | 1274    | no  | 228            | yes     |
| 47 | yes | no  | no      | 1262    | no  | 192            | unknown |
| 48 | yes | no  | no      | 983     | no  | 180            | unknown |
| 49 | yes | no  | no      | 22      | no  | 7              | unknown |
| 50 | no  | no  | yes     | 1017    | yes | 23             | yes     |
| 51 | no  | no  | no      | 0       | no  | unknown        | unknown |

|    |     |     |         |         |     |         |         |
|----|-----|-----|---------|---------|-----|---------|---------|
| 1  |     |     |         |         |     |         |         |
| 2  | yes | no  | no      | unknown | yes | unknown | unknown |
| 3  | yes | no  | yes     | unknown | yes | 17      | unknown |
| 4  | yes | no  | no      | 924     | no  | 180     | yes     |
| 5  | yes | no  | no      | unknown | yes | 36      | unknown |
| 6  | no  | no  | unknown | 0       | no  | unknown | unknown |
| 7  | no  | no  | unknown | unknown | no  | unknown | unknown |
| 8  | no  | no  | no      | unknown | yes | 216     | yes     |
| 9  | no  | no  | unknown | 997     | yes | unknown | unknown |
| 10 | yes | no  | unknown | 400     | no  | 36      | unknown |
| 11 | yes | no  | yes     | 400     | yes | 35      | unknown |
| 12 | yes | no  | unknown | 400     | no  | 36      | unknown |
| 13 | no  | no  | no      | 84      | no  | 97      | unknown |
| 14 | no  | no  | no      | unknown | yes | 12      | unknown |
| 15 | yes | no  | yes     | 1227    | no  | 120     | unknown |
| 16 | yes | no  | no      | unknown | no  | 192     | yes     |
| 17 | yes | no  | no      | 205     | no  | 132     | yes     |
| 18 | yes | no  | no      | 1262    | no  | 120     | yes     |
| 19 | yes | no  | no      | unknown | no  | 84      | yes     |
| 20 | yes | no  | no      | unknown | no  | 193     | unknown |
| 21 | no  | no  | no      | 1186    | yes | 24      | unknown |
| 22 | yes | no  | no      | 185     | yes | 36      | unknown |
| 23 | yes | yes | yes     | 0       | no  | 115     | unknown |
| 24 | yes | no  | no      | 323     | yes | 43      | unknown |
| 25 | yes | no  | no      | 268     | yes | 60      | yes     |
| 26 | no  | no  | no      | 958     | yes | 60      | unknown |
| 27 | no  | yes | no      | unknown | no  | 192     | unknown |
| 28 | no  | no  | yes     | unknown | yes | 76      | unknown |
| 29 | no  | no  | yes     | 1138    | yes | 12      | unknown |
| 30 | no  | no  | yes     | 1102    | yes | 12      | unknown |
| 31 | yes | no  | unknown | 575     | yes | 60      | unknown |
| 32 | no  | no  | unknown | 1631    | yes | unknown | unknown |
| 33 | no  | no  | no      | unknown | yes | 132     | unknown |
| 34 | yes | no  | no      | unknown | yes | unknown | unknown |
| 35 | no  | no  | no      | 1472    | yes | 12      | unknown |
| 36 | no  | no  | yes     | unknown | yes | 12      | unknown |
| 37 | no  | no  | unknown | >400    | no  | 9       | unknown |
| 38 | no  | no  | unknown | 164     | yes | 60      | unknown |
| 39 | yes | no  | no      | unknown | yes | 72      | yes     |
| 40 | yes | no  | no      | 158     | yes | 60      | unknown |
| 41 | no  | no  | no      | 433     | yes | 144     | unknown |
| 42 | no  | yes | yes     | unknown | no  | 60      | yes     |
| 43 | no  | no  | no      | 5       | yes | unknown | unknown |
| 44 |     |     |         |         |     |         |         |
| 45 |     |     |         |         |     |         |         |
| 46 |     |     |         |         |     |         |         |
| 47 |     |     |         |         |     |         |         |
| 48 |     |     |         |         |     |         |         |
| 49 |     |     |         |         |     |         |         |
| 50 |     |     |         |         |     |         |         |
| 51 |     |     |         |         |     |         |         |
| 52 |     |     |         |         |     |         |         |
| 53 |     |     |         |         |     |         |         |
| 54 |     |     |         |         |     |         |         |
| 55 |     |     |         |         |     |         |         |
| 56 |     |     |         |         |     |         |         |
| 57 |     |     |         |         |     |         |         |
| 58 |     |     |         |         |     |         |         |
| 59 |     |     |         |         |     |         |         |
| 60 |     |     |         |         |     |         |         |

## Preferred Reporting Items for Systematic reviews and Meta-Analyses extension for Scoping Reviews (PRISMA-ScR) Checklist

| SECTION                                               | ITEM | PRISMA-ScR CHECKLIST ITEM                                                                                                                                                                                                                                                                                  | REPORTED ON PAGE #        |
|-------------------------------------------------------|------|------------------------------------------------------------------------------------------------------------------------------------------------------------------------------------------------------------------------------------------------------------------------------------------------------------|---------------------------|
| <b>TITLE</b>                                          |      |                                                                                                                                                                                                                                                                                                            |                           |
| Title                                                 | 1    | Identify the report as a scoping review.                                                                                                                                                                                                                                                                   | 1                         |
| <b>ABSTRACT</b>                                       |      |                                                                                                                                                                                                                                                                                                            |                           |
| Structured summary                                    | 2    | Provide a structured summary that includes (as applicable): background, objectives, eligibility criteria, sources of evidence, charting methods, results, and conclusions that relate to the review questions and objectives.                                                                              | 2                         |
| <b>INTRODUCTION</b>                                   |      |                                                                                                                                                                                                                                                                                                            |                           |
| Rationale                                             | 3    | Describe the rationale for the review in the context of what is already known. Explain why the review questions/objectives lend themselves to a scoping review approach.                                                                                                                                   | 3                         |
| Objectives                                            | 4    | Provide an explicit statement of the questions and objectives being addressed with reference to their key elements (e.g., population or participants, concepts, and context) or other relevant key elements used to conceptualize the review questions and/or objectives.                                  | 3                         |
| <b>METHODS</b>                                        |      |                                                                                                                                                                                                                                                                                                            |                           |
| Protocol and registration                             | 5    | Indicate whether a review protocol exists; state if and where it can be accessed (e.g., a Web address); and if available, provide registration information, including the registration number.                                                                                                             | No review protocol exists |
| Eligibility criteria                                  | 6    | Specify characteristics of the sources of evidence used as eligibility criteria (e.g., years considered, language, and publication status), and provide a rationale.                                                                                                                                       | 4                         |
| Information sources*                                  | 7    | Describe all information sources in the search (e.g., databases with dates of coverage and contact with authors to identify additional sources), as well as the date the most recent search was executed.                                                                                                  | 3-4                       |
| Search                                                | 8    | Present the full electronic search strategy for at least 1 database, including any limits used, such that it could be repeated.                                                                                                                                                                            | 3-4                       |
| Selection of sources of evidence†                     | 9    | State the process for selecting sources of evidence (i.e., screening and eligibility) included in the scoping review.                                                                                                                                                                                      | 4                         |
| Data charting process‡                                | 10   | Describe the methods of charting data from the included sources of evidence (e.g., calibrated forms or forms that have been tested by the team before their use, and whether data charting was done independently or in duplicate) and any processes for obtaining and confirming data from investigators. | 4                         |
| Data items                                            | 11   | List and define all variables for which data were sought and any assumptions and simplifications made.                                                                                                                                                                                                     | 4                         |
| Critical appraisal of individual sources of evidence§ | 12   | If done, provide a rationale for conducting a critical appraisal of included sources of evidence; describe the methods used and how this information was used in any data synthesis (if appropriate).                                                                                                      | Click here to enter text. |

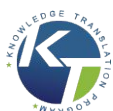

| SECTION                                       | ITEM | PRISMA-ScR CHECKLIST ITEM                                                                                                                                                                       | REPORTED ON PAGE #        |
|-----------------------------------------------|------|-------------------------------------------------------------------------------------------------------------------------------------------------------------------------------------------------|---------------------------|
| Synthesis of results                          | 13   | Describe the methods of handling and summarizing the data that were charted.                                                                                                                    | 4                         |
| <b>RESULTS</b>                                |      |                                                                                                                                                                                                 |                           |
| Selection of sources of evidence              | 14   | Give numbers of sources of evidence screened, assessed for eligibility, and included in the review, with reasons for exclusions at each stage, ideally using a flow diagram.                    | Figure 1, page 5          |
| Characteristics of sources of evidence        | 15   | For each source of evidence, present characteristics for which data were charted and provide the citations.                                                                                     | Table S4                  |
| Critical appraisal within sources of evidence | 16   | If done, present data on critical appraisal of included sources of evidence (see item 12).                                                                                                      | Click here to enter text. |
| Results of individual sources of evidence     | 17   | For each included source of evidence, present the relevant data that were charted that relate to the review questions and objectives.                                                           | Table S4                  |
| Synthesis of results                          | 18   | Summarize and/or present the charting results as they relate to the review questions and objectives.                                                                                            | Figure 2, pages 6 & 8     |
| <b>DISCUSSION</b>                             |      |                                                                                                                                                                                                 |                           |
| Summary of evidence                           | 19   | Summarize the main results (including an overview of concepts, themes, and types of evidence available), link to the review questions and objectives, and consider the relevance to key groups. | 10 -11                    |
| Limitations                                   | 20   | Discuss the limitations of the scoping review process.                                                                                                                                          | 11                        |
| Conclusions                                   | 21   | Provide a general interpretation of the results with respect to the review questions and objectives, as well as potential implications and/or next steps.                                       | 11                        |
| <b>FUNDING</b>                                |      |                                                                                                                                                                                                 |                           |
| Funding                                       | 22   | Describe sources of funding for the included sources of evidence, as well as sources of funding for the scoping review. Describe the role of the funders of the scoping review.                 | 12                        |

JBI = Joanna Briggs Institute; PRISMA-ScR = Preferred Reporting Items for Systematic reviews and Meta-Analyses extension for Scoping Reviews.

\* Where *sources of evidence* (see second footnote) are compiled from, such as bibliographic databases, social media platforms, and Web sites.

† A more inclusive/heterogeneous term used to account for the different types of evidence or data sources (e.g., quantitative and/or qualitative research, expert opinion, and policy documents) that may be eligible in a scoping review as opposed to only studies. This is not to be confused with *information sources* (see first footnote).

‡ The frameworks by Arksey and O'Malley (6) and Levac and colleagues (7) and the JBI guidance (4, 5) refer to the process of data extraction in a scoping review as data charting.

§ The process of systematically examining research evidence to assess its validity, results, and relevance before using it to inform a decision. This term is used for items 12 and 19 instead of "risk of bias" (which is more applicable to systematic reviews of interventions) to include and acknowledge the various sources of evidence that may be used in a scoping review (e.g., quantitative and/or qualitative research, expert opinion, and policy document).

From: Tricco AC, Lillie E, Zarin W, O'Brien KK, Colquhoun H, Levac D, et al. PRISMA Extension for Scoping Reviews (PRISMA-ScR): Checklist and Explanation. *Ann Intern Med.* 2018;169:467–473. doi: 10.7326/M18-0850.

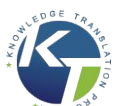

St. Michael's

Inspired Care.  
Inspiring Science.

For peer review only - <http://bmjopen.bmj.com/site/about/guidelines.xhtml>
