# Supplementary material for: German primary care data collection projects: a scoping review
Source: PubMed Central journal article supplement — BMJ Open. 2024 Feb 20;14(2):e074566. doi: 10.1136/bmjopen-2023-074566 (PMC10882319; doi:10.1136/bmjopen-2023-074566), 2024-02-20
Supplement: bmjopen-2023-074566supp001.pdf [file bmjopen-2023-074566supp001.pdf]

Table S1: Search Strategies

Search String for Ovid (June 2022)

| Set | Search Statement                                                           | Results |
|-----|----------------------------------------------------------------------------|---------|
| 1.  | exp Primary Health Care/                                                   |         |
| 2.  | exp General Practice/                                                      |         |
| 3.  | general practitioners/ or physicians, family/ or physicians, primary care/ |         |
| 4.  | general practi*.tw.                                                        |         |
| 5.  | (primary adj3 care).tw.                                                    |         |
| 6.  | (family adj3 (practi* or doctor or physician*)).tw.                        |         |
| 7.  | or/1-6                                                                     |         |
| 8.  | exp medical records/                                                       |         |
| 9.  | exp routinely collected health data/                                       |         |
| 10. | (routine* adj3 (collect* or record* or document*)).tw.                     |         |
| 11. | health servic* research.tw.                                                |         |
| 12. | (electronic adj3 record*).tw.                                              |         |
| 13. | CONTinuous morbidity registration Epidemiologic NeTwork.tw.                |         |
| 14. | Disease Analyzer.tw.                                                       |         |
| 15. | or/8-14                                                                    |         |
| 16. | exp Germany/                                                               |         |
| 17. | German*.tw.                                                                |         |
| 18. | or/16-17                                                                   |         |
| 19. | 7 and 15 and 18                                                            | 415     |

## Search String LIVIVO (June 2022)

| Set | Search Statement              | Results |
|-----|-------------------------------|---------|
| 1   | Haus?rzt                      |         |
| 2   | Primär?rzt*                   |         |
| 3   | Allgemein?rztlich*            |         |
| 4   | Allgemeinmedizin*             |         |
| 5   | Ambulant*                     |         |
| 6   | OR 1-5                        |         |
| 7   | Routinedaten*                 |         |
| 8   | BDT                           |         |
| 9   | Elektronische* Patientenakte* |         |
| 10  | OR 7-9                        |         |
| 11  | 6 AND 10                      | 420     |

## Pubmed (NLM)

Search terms (June 2022):

"Germany"[All Fields] AND "Disease Analyzer"[All Fields]

**210 studies were imported**

Table S3: Collected variables

|                               |                                    | IQVIA™ Disease Analyzer     | MedVip  | CONTENT                     | BeoNet Hannover              | RADARplus | BeoNet Halle                        |
|-------------------------------|------------------------------------|-----------------------------|---------|-----------------------------|------------------------------|-----------|-------------------------------------|
| <b>Physician types</b>        | All ambulatory                     | ✓                           | -       | -                           | -                            | -         | ✓                                   |
|                               | General Practitioner               | ✓                           | ✓       | ✓                           | ✓                            | ✓         | ✓                                   |
|                               | Pneumologists                      | ✓                           | -       | -                           | ✓                            | unknown   | ✓                                   |
|                               | Paediatricians                     | ✓                           | -       | -                           | unknown                      | unknown   | ✓                                   |
|                               | Internists                         | ✓                           | -       | ✓                           | unknown                      | unknown   | ✓                                   |
| <b>Physician demographics</b> | Physician number                   | -                           | unknown | -                           | ✓                            | unknown   | ✓                                   |
|                               | Age                                | ✓                           | -       | ✓                           | unknown                      | -         | ✓                                   |
|                               | Gender                             | ✓                           | -       | ✓                           | unknown                      | -         | ✓                                   |
|                               | Years in practice                  | ✓                           | -       | ✓                           | unknown                      | -         | ✓                                   |
| <b>Practices demographics</b> | Type                               | ✓                           | -       | ✓                           | ✓                            | ✓         | ✓                                   |
|                               | Region                             | ✓                           | ✓       | ✓                           | ✓                            | ✓         | ✓                                   |
|                               |                                    | east or west                |         | east or west                |                              |           | east or west                        |
|                               | Frequency of patients              | ✓                           | unknown | unknown                     | ✓                            | unknown   | ✓                                   |
|                               | No. of doctors                     | ✓                           | unknown | ✓                           | ✓                            | unknown   | ✓                                   |
|                               | No. of employees                   | ✓                           | unknown | ✓                           | ✓                            | unknown   | ✓                                   |
| <b>Patient demographics</b>   | Age                                | ✓                           | ✓       | ✓                           | ✓                            | ✓         | ✓                                   |
|                               | Gender                             | ✓                           | ✓       | ✓                           | ✓                            | ✓         | ✓                                   |
|                               | Patient since                      | -                           | -       | -                           | ✓                            | unknown   | ✓                                   |
|                               | Employment                         | -                           | -       | ✓                           | ✓                            | -         | -                                   |
|                               | Medical insurance status           | ✓<br>(private or statutory) | -       | ✓<br>(private or statutory) | ✓<br>(private or statutory)  | unknown   | ✓<br>(private or statutory)         |
|                               | Medical insurance provider         | ✓                           | -       | -                           | ✓                            | unknown   | ✓                                   |
|                               | Region                             | ✓                           | -       | ✓                           | ✓                            | unknown   | ✓                                   |
|                               | Nationality                        | east or west<br>unknown     | -       | ✓                           | ✓                            | unknown   | ✓                                   |
| <b>BMI and risk factors</b>   | BMI; smoking and alcohol recording |                             | smoking | unknown                     | BMI, risk factors, allergies | -         | BMI, BP, HR, allergies, operations, |

|                                                             |                                                                                              |                                                              |                                                                                               |                                                                             |                                                              |                                                                                    |
|-------------------------------------------------------------|----------------------------------------------------------------------------------------------|--------------------------------------------------------------|-----------------------------------------------------------------------------------------------|-----------------------------------------------------------------------------|--------------------------------------------------------------|------------------------------------------------------------------------------------|
|                                                             | rarely documented (~5%)                                                                      |                                                              |                                                                                               |                                                                             |                                                              | smoking status, risk factors                                                       |
| <b>Social history</b>                                       | unknown                                                                                      | -                                                            | unknown                                                                                       | unknown                                                                     | unknown                                                      | -                                                                                  |
| <b>Pregnancy or family status</b>                           | pregnancy, gynecologist records; family data incomplete                                      | -                                                            | unknown                                                                                       | pregnancy, number of children                                               | unknown                                                      | pregnancy, number of children                                                      |
| <b>Diagnosis</b>                                            | diagnosis, ICD 10 codes and original text                                                    | diagnosis, ICD 10 codes and original text, billing codes     | diagnosis, ICD 10 codes, ICPC codes and original text, reasons for encounter, medical history | diagnosis, ICD 10 codes, medical history                                    | diagnosis, ICD 10 codes, medical history                     | diagnosis name, ICD 10 codes, medical history,                                     |
| <b>Billing codes</b>                                        | unknown                                                                                      | yes                                                          | yes                                                                                           | yes                                                                         | unknown                                                      | yes                                                                                |
| <b>procedures, findings, therapies</b>                      | lab test results; other test results variably available or can be requested from paper files | unknown                                                      | lab test results                                                                              | lab and X-ray test results, blood pressure, internal and external findings, | unknown                                                      | lab and X-ray test results, blood pressure, internal and external findings         |
| <b>drug information</b>                                     | drug name, route, dosage, frequency, duration, cost of therapy                               | drug name                                                    | drug name, long term medication, dosage, cost of therapy                                      | drug name and ATC code, (long term) medication, cost of therapy             | drug name, long-term medication, date                        | drug name and ATC code, (long term) medication, dosage, frequency, cost of therapy |
| <b>Healthcare utilization</b>                               | practice visits, referrals, sick leave, hospitalizations                                     | unknown                                                      | practice visits, referrals, sick leave, hospitalizations                                      | practice visits, referrals, sick leave, hospitalizations                    | unknown                                                      | practice visits, referrals, sick leave, hospitalizations                           |
| <b>Images (e.g X-ray)</b>                                   | unknown                                                                                      | no                                                           | no                                                                                            | no                                                                          | no                                                           | no                                                                                 |
| <b>Projects obtaining additional data beyond usual care</b> | yes, Quality of Life questionnaires upon request                                             | yes, study specific                                          | n. a.                                                                                         | yes, study specific                                                         | yes, study specific                                          | yes, study specific                                                                |
| <b>Missing Data</b>                                         | Social and economic data (salary, family status, employment), secondary care data            | social and economic data (salary, family status, employment) | social and economic data (salary, family status, employment), secondary care data,            | social and economic data (salary, family status, employment)                | social and economic data (salary, family status, employment) | social and economic data (salary, family status, employment)                       |

Table S4: Data evaluation and access and recruitment

|                               | IQVIA™ Disease Analyzer         | CONTENT                                                                                  | MedVip                                     | BeoNet Hannover                                 | BeoNet Halle                                    | RADARplus                                  |                       |
|-------------------------------|---------------------------------|------------------------------------------------------------------------------------------|--------------------------------------------|-------------------------------------------------|-------------------------------------------------|--------------------------------------------|-----------------------|
| In-house data evaluation      | ✓                               | ✓                                                                                        | ✓                                          | ✓                                               | ✓                                               | ✓                                          |                       |
| Feedback reports to practices | ✓                               | ✓                                                                                        | ✓                                          | ✓                                               | ✓                                               | n.a.                                       |                       |
| Interim project reports       | n.a.                            | ✓                                                                                        | ✓                                          | ✓                                               | ✓                                               | n.a.                                       |                       |
| External data access          | ✓                               | -                                                                                        | -                                          | -                                               | n.a.                                            | n.a.                                       |                       |
| Financial incentives          | Yes, but amount unknown         | Quarterly 375 € per practice                                                             | 500 € once per physician                   | -                                               | 2 € per signed broad consent                    | n.a.                                       |                       |
| Type of physician support     | support how to use the software | Training in ICPC coding, hotline for software problems & regular quality circle meetings | On-site support to extract requested data. | establishing a practice research infrastructure | establishing a practice research infrastructure | On-site support to extract requested data. |                       |
| Recruitment Strategy          | Snowball                        | n.a.                                                                                     | -                                          | -                                               | ✓                                               | ✓                                          | n.a.                  |
|                               | Presentations                   | n.a.                                                                                     | ✓                                          | -                                               | n.a.                                            | ✓                                          | ✓                     |
|                               | Circulars                       | n.a.                                                                                     | ✓                                          | ✓<br>with 2 reminders                           | n.a.                                            | -                                          | ✓<br>E-Mail & written |
|                               | Articles                        | n.a.                                                                                     | ✓                                          | -                                               | ✓                                               | ✓                                          | ✓                     |
|                               | Homepage                        | n.a.                                                                                     | ✓                                          | -                                               | ✓                                               | ✓                                          | ✓                     |
| Patient recruitment through   | -                               | -                                                                                        | Attending physician                        | Attending physician                             | Trusted third party                             | Trusted third party                        |                       |
| n.a.: not available           |                                 |                                                                                          |                                            |                                                 |                                                 |                                            |                       |
